# Supplementary material for: An interpretable credit risk assessment model with boundary sample identification
Source: PeerJ Comput Sci. 2025 Jun 30;11:e2988. doi: 10.7717/peerj-cs.2988 (PMC12453813; doi:10.7717/peerj-cs.2988)
Supplement: Supplemental Information 1 — An online personal loan default prediction dataset based on an anonymous online lender in China, which contains 10,000 samples of 30 dimensions, of which 8,317 are non-defaulted and 1,683 are defaulted. The dataset is available at: https://www.datafountain.cn/datasets/6218. Registration and login are required to download it. [file peerj-cs-11-2988-s001.xlsx]

## Sheet: p2p
total_loan	year_of_loan	interest	monthly_payment	house_exist	censor_status	use	post_code	region	debt_loan_ratio	del_in_18month	scoring_low	scoring_high	known_outstanding_loan	known_dero	pub_dero_bankrup	recircle_b	recircle_u	initial_list_status	app_type	title	f0	f1	f2	f3	f4	early_return	early_return_amount	early_return_amount_3mon	label
31818.2	3	11.466	1174.91	0	1	2	193	13	2.43	0	556.364	649.091	3	0	0	7734.23	91.8	0	0	5	1	0	4	5	4	3	9927	0	0
28000	5	16.841	670.69	0	2	0	491	30	11.0045	1	715	893.75	3	0	0	31329	54.8	1	0	40642	7	0	4	45	22	0	0	0	0
17272.7	3	8.9	603.32	1	0	4	459	8	6.40909	0	774.545	903.636	5	0	0	18514	57.6923	1	0	154	6	0	6	28	19	0	0	0	0
20000	3	4.788	602.3	0	1	0	157	8	9.20455	0	750	875	3	0	0	20707	42.6	0	0	0	5	0	10	15	9	0	0	0	0
15272.7	3	12.79	470.31	2	1	0	38	21	15.5782	0	609.091	710.606	15	0	0	14016.2	30.4615	0	0	0	10	0	6	15	4	0	0	0	0
25454.5	3	10.637	899.15	0	1	0	258	8	15.8073	0	636.364	689.394	4	0	0	16084.9	58.8923	0	0	28	6	0	6	20	15	0	0	0	0
9090.91	5	15.741	234.3	1	2	0	58	17	4.24364	1	600	650	9	1	1	1527.08	17.0154	0	0	0	4	0	9	25	6	0	0	0	0
10288.6	3	11.49	414.62	1	1	4	242	8	2.22727	0	690	805	4	0	0	5082	34.7	0	0	4	4	0	0	9	9	0	0	0	0
6818.18	3	20.064	272.05	0	2	0	165	17	22.9309	0	600	750	9	1	1	18810	88.6154	0	0	0	6	0	2	34	22	0	0	0	0
10800	3	14.33	339.95	1	1	0	263	0	21.2236	0	564.545	705.682	8	0	0	3433.85	93.3462	0	0	37768	3	0	15	6	6	0	0	0	0
14727.3	5	12.897	421.92	1	1	0	14	11	24.5	0	636.364	689.394	18	0	0	27758.8	69.1	1	0	35995	4	0	8	11	9	0	0	0	0
6400	3	20.889	234.57	2	2	0	296	5	37.56	1	725.455	906.818	8	0	0	13980	69.5769	1	0	0	3	0	6	16	9	0	0	0	0
29454.5	3	6.489	1115.04	2	1	0	49	12	29.7245	0	668.182	779.545	24	0	0	31375.1	48.3462	0	1	0	8	0	24	30	10	0	0	0	0
1636.36	3	17.091	65.98	1	1	0	255	9	23.14	0	660	770	6	2	0	5049	108.769	0	0	0	3	0	6	4	2	0	0	0	1
20415.9	5	15.291	429.24	0	0	0	408	14	29.4091	0	685	799.167	6	0	0	21566.5	82.3	0	0	0	3	0	10	9	6	0	0	0	0
5500	3	12.62	184.32	1	0	0	549	8	36.7636	1	605.455	706.364	10	0	0	7252	29.2615	0	0	0	4	0	6	9	4	0	0	0	0
35000	5	12.69	790.82	0	2	0	19	14	27.45	0	805	939.167	17	0	0	3976.62	8.61538	0	0	0	3	0	10	18	6	0	0	0	1
7090.91	3	6.615	186.23	0	2	0	616	0	20.7164	0	556.364	602.727	11	0	0	10645	58.2692	0	0	0	8	0	4	14	6	0	0	0	0
20454.5	3	6.291	771.82	0	1	4	89	3	14.9545	0	576.818	672.955	10	1	0	53312	53.0923	0	0	4	8	0	2	19	12	0	0	0	0
8181.82	5	17.171	241.12	1	2	4	95	13	14.1364	1	670	837.5	7	0	0	13693.1	73.9	0	0	4	4	0	5	6	4	0	0	0	1
41363.6	5	15.939	823.31	0	1	4	63	14	12.9927	0	540	675	21	0	0	47656	73.6615	1	0	4	14	0	14	24	11	0	0	0	1
8727.27	3	10.923	257.88	1	0	0	49	12	4.32727	0	600	650	4	0	0	4550	46.5	0	0	0	4	0	1	5	3	0	0	0	0
16363.6	5	14.193	483.93	0	0	0	526	20	16.1782	0	720	780	6	0	0	21223	103.385	1	0	0	4	0	12	7	3	0	0	0	0
21818.2	3	9.99	645.25	0	1	0	232	13	15.6873	0	660	825	7	1	1	6538	41.9	0	0	0	2	0	3	17	12	0	0	0	0
4545.45	3	12.744	171.28	2	0	8	529	23	8.09	0	774.545	839.091	3	0	0	2917.85	49.4769	1	0	9	2	0	1	4	3	0	0	0	0
17727.3	3	17.091	549.77	1	1	4	171	8	22.7782	0	741.818	865.455	9	0	0	11990.5	62.1385	1	0	4	3	0	5	4	3	0	0	0	1
18590.9	5	19.99	541.69	1	1	0	249	36	21.6655	0	695	752.917	10	1	1	2249	26.1923	0	0	0	4	0	9	8	1	0	0	0	0
3636.36	3	13.185	137.98	1	0	0	550	8	29.27	0	660	770	14	1	1	8354	99.3462	1	0	0	9	0	5	13	11	0	0	0	0
27409.1	5	12.591	779.32	0	1	0	29	19	15.85	1	631.818	684.47	8	0	0	13350	98.8846	0	0	0	3	0	5	4	3	0	0	0	1
3220.45	3	10.791	90.5	0	0	0	413	37	10.6818	0	660	770	10	0	0	5507.38	40.3	1	0	0	5	0	12	20	12	0	0	0	0
30000	3	5.841	903.31	0	1	0	54	28	26.47	0	785	915.833	13	0	0	23802.7	29.1923	1	0	0	6	0	9	10	6	0	0	0	0
24818.2	3	14.391	738.2	0	1	0	36	13	15.24	0	589.091	687.273	22	0	0	5449.85	14.8615	0	0	0	8	0	5	30	9	0	0	0	0
35454.5	5	13.49	690.15	0	1	3	340	14	11.41	0	572.727	668.182	10	1	0	17638.9	76.6769	1	0	3	5	0	6	8	6	0	0	0	0
8727.27	3	10.076	255	0	2	2	345	20	20.9864	0	548.182	593.864	17	0	0	28251.9	72.6923	0	0	5	12	0.00142201	12	16	8	0	0	0	0
8181.82	3	8.239	311.02	2	0	0	818	43	15.3818	0	695.455	753.409	11	0	0	4607.31	20.0308	0	0	0	5	0	10	11	8	3	341	68.2	0
15709.1	3	11.691	646.84	1	1	3	715	13	20.8145	0	730	912.5	6	0	0	14237	86.4231	0	0	3	3	0	6	10	4	3	4587	917.4	0
22909.1	5	17.171	506.34	0	2	0	235	8	1.75	0	752.727	878.182	5	0	0	6310.77	76.0308	1	0	0	1	0	2	2	0	0	5417	1083.4	0
28363.6	5	19.327	603.85	0	1	0	451	36	12.96	1	695	810.833	11	1	0	10949.5	49.1077	1	0	0	6	0	5	13	4	5	9268	926.8	0
27272.7	3	12.88	840.91	0	0	0	405	2	11.3455	1	736.364	920.455	6	0	0	14843.2	83.1692	0	0	0	4	0	3	6	2	0	10584	2116.8	0
11345.5	3	13.33	324.99	1	2	0	189	9	14.9545	2	613.636	767.045	11	1	1	2022.46	16.1538	1	0	0	10	0.00142201	2	18	10	3	3880	776	0
16363.6	5	16.77	494.59	0	2	0	499	13	23.04	0	700	875	12	0	0	18492.9	64.6154	1	0	38	5.69049	0.00142201	8.4678	14.659	8.09808	1	2822	0	0
20454.5	3	8.69	782.26	0	1	0	63	14	9.59	0	785.455	916.364	14	0	0	12530.8	20.0308	0	0	0	9	0	8	19	14	3	1656	331.2	0
27181.8	3	11.061	767.12	0	0	4	43	19	5.94	0	710	887.5	9	2	0	16018.8	48	0	0	4	5	0	5	16	12	0	5259	0	0
4090.91	3	10.087	143.46	1	1	0	267	27	10.36	0	540	585	8	2	2	1024	8.07692	0	0	0	3	0	5	15	6	1	1565	469.5	0
6545.45	3	7.89	250.29	1	0	2	167	8	10.9182	1	741.818	927.273	18	0	0	6332	11.1	0	0	5	8	0	7	23	17	3	1645	329	0
20945.5	3	5.841	588.38	0	0	0	812	14	8.64	0	634.091	686.932	11	0	0	37053	46.6154	0	0	0	5	0	2	20	14	3	7692	0	0
5454.55	3	15.378	205.01	0	0	0	72	10	22.0145	0	540	585	6	0	0	9140.77	94.2692	1	0	0	4	0	1	5	3	0	0	0	1
21272.7	5	16.416	497.73	0	2	0	475	37	13.5573	0	785.455	916.364	15	1	1	4690	23.0769	0	0	0	4	0	37	18	8	2	7135	0	0
11818.2	3	11.754	438.4	0	0	0	157	8	18.4091	0	750	937.5	23	0	0	8119.62	21.7538	1	1	0	9	0	3	33	9	3	1680	336	0
15363.6	3	5.852	391.5	0	0	2	230	2	9.97364	0	725	906.25	12	0	0	13018.8	45.5	0	0	5	6	0	4	12	4	3	3602	1080.6	0
10000	3	17.919	353.01	0	1	0	162	2	11.4273	0	690	747.5	5	1	1	2426	65.6	1	0	0	1	0	8	2	1	1	961	0	0
8181.82	3	12.681	342.22	0	0	12	369	21	13.0364	0	568.636	710.795	11	0	0	39175	92.6538	1	0	3284	5.69049	0.00142201	8.4678	14.659	8.09808	3	4627	925.4	0
10909.1	3	12.897	412.06	1	0	4	120	21	15.16	0	685	799.167	10	0	0	18181	54.2769	1	0	22413	6	0	9	17	9	3	5262	0	0
15454.5	5	24.99	498.88	0	1	0	307	14	3.82909	0	564.545	705.682	4	0	0	6909.23	54.6	1	0	0	3	0	0	6	2	0	183	54.9	0
24000	5	14.839	358.3	0	2	2	246	36	18.74	0	597.273	746.591	14	0	0	26859.5	28.9846	1	0	94	5.69049	0.00142201	8.4678	14.659	8.09808	4	7655	765.5	0
10000	3	10.791	365.31	1	1	0	79	2	21.7391	0	780	910	12	0	0	13071	63.1154	1	0	0	8	0	6	19	11	0	1981	396.2	0
21436.4	3	10.791	652.57	1	0	0	184	26	19.5364	0	627.273	731.818	8	0	0	14072.3	61.9	1	0	0	5	0	6	8	4	2	798	239.4	0
11200	3	7.9	350.46	0	2	0	46	27	20.2455	5	613.636	664.773	10	0	0	5155.38	60.7	0	0	38	5	0	10	13	5	1	5124	512.4	0
2100	3	11.44	69.19	0	2	5	124	13	7.79	4	618.182	721.212	20	1	0	6664.62	25.6615	0	0	6	9	0	2	27	8	0	0	0	1
9218.18	3	16.99	301.23	1	2	0	232	13	12.6164	0	640.909	694.318	5	0	0	11884.6	72	0	0	0	3	0	4	7	4	0	0	0	1
8181.82	3	7.371	314.25	1	2	0	111	8	15.74	0	552.273	690.341	14	0	0	15355.8	62	1	0	0	11	0	5	24	12	0	0	0	1
4581.82	3	13.519	140.09	1	1	3	590	8	8.42727	0	680	736.667	9	0	0	4276	48.3462	1	0	3	5	0	5	16	7	2	691	69.1	0
21272.7	5	11.421	406.71	0	0	4	92	18	8.85455	0	548.182	639.545	7	0	0	15071.5	87.4154	0	0	4	4	0	15	4	3	2	7778	777.8	0
10400	5	19.338	261.73	1	2	1	143	8	8.93	0	593.182	741.477	8	1	1	921.846	5.42308	1	0	4663	5.69049	0.00142201	8.4678	14.659	8.09808	0	0	0	1
9818.18	5	13.545	285.8	2	0	3	45	21	2.43818	0	763.636	890.909	6	0	0	552.692	6.46154	0	0	3	4	0	3	9	3	0	0	0	1
9454.55	3	12.99	269.52	1	2	0	261	8	18.72	1	680	793.333	14	0	0	20673.7	62.4231	1	0	28914	8	0	2	14	8	1	1652	330.4	0
7500	3	17.919	264.76	1	0	4	313	43	11.9782	0	747.273	809.545	9	1	1	5123	31.0154	1	0	1158	3	0	2	15	12	0	0	0	1
10000	3	14.421	337.47	1	2	11	187	9	20.1109	0	636.364	742.424	9	0	0	17533.4	84.6923	1	0	58510	5.69049	0.00142201	8.4678	14.659	8.09808	0	4138	1241.4	0
32727.3	3	9.75	964.5	0	1	4	52	19	26.1055	0	720	840	37	0	0	41427.7	46.6	1	0	4	12	0	9	57	26	0	0	0	1
10909.1	3	12.69	335.45	1	2	0	111	8	9.08727	0	560.455	607.159	8	0	0	10902.8	69.8923	1	0	0	5	0	4	8	3	0	0	0	0
20454.5	3	8.789	783.3	1	0	0	107	30	22.5736	0	785.455	916.364	11	0	0	16076.3	41.1	1	0	0	2	0	7	13	7	0	0	0	0
10636.4	3	5.32	271.04	0	0	4	460	27	9.19636	0	796.364	929.091	8	0	0	12051.9	56.2	0	0	4	4	0	6	7	3	0	0	0	0
31818.2	5	24.695	975.64	2	0	0	291	23	35.7455	1	613.636	767.045	20	1	0	24308.3	80.1231	0	0	0	13	0	13	27	17	0	0	0	1
2545.45	3	18.689	99.82	1	2	7	134	8	20.5091	0	752.727	815.455	10	0	0	9998.15	47.1692	0	0	8	3	0	5	7	3	0	0	0	0
35000	5	18.854	872.48	1	2	0	466	36	11.1518	0	700	816.667	11	0	0	42127.4	101.9	0	0	0	3	0	15	14	7	0	0	0	0
27500	5	12.089	597.78	0	2	2	90	21	2.7	0	725.455	906.818	8	1	1	8822	23.8846	0	0	5	5	0	7	14	7	0	0	0	0
12272.7	5	13.67	346.47	0	1	0	404	22	6.31636	0	597.273	696.818	23	1	1	5556	28.1	0	0	0	2	0	26	13	7	0	0	0	1
2863.64	3	11.421	117.41	1	0	1	19	14	8.1	0	736.364	797.727	8	0	0	50	0.6	1	0	3880	5.69049	0.00142201	8.4678	14.659	8.09808	0	0	0	0
14545.5	3	15.389	546.77	1	2	0	107	30	19.8218	0	660	825	13	1	1	16388.6	86.0769	0	0	0	7	0	4	25	8	0	0	0	0
18181.8	3	8.541	640.57	0	0	4	677	13	17.33	0	730	912.5	20	0	0	23210.8	67.2692	1	0	4	11	0	38	22	12	0	0	0	0
10909.1	3	17.99	361.48	1	1	4	343	27	12.0109	0	568.636	710.795	11	0	0	13140	41.5385	1	0	4	4	0	5	9	6	0	0	0	0
32727.3	3	12.582	1025.04	0	2	4	777	8	8.31273	0	556.364	649.091	11	0	0	13504	75.9	1	0	4	3	0	2	21	16	0	0	0	0
35781.8	3	23.298	1238.78	0	2	0	42	26	15.16	1	613.636	664.773	21	0	0	12552.7	19.8462	1	0	0	11	0	6	21	10	0	0	0	0
4545.45	3	12.639	164.86	0	1	0	32	21	20.3909	0	705	763.75	23	0	0	25902.2	25.5	0	0	0	10	0	12	19	10	0	0	0	0
35000	3	17.171	1223.77	0	1	4	104	23	6.78545	0	640.909	747.727	21	0	0	10675	70.1077	1	0	4	4	0	36	6	3	0	0	0	1
21818.2	5	10.736	422.59	2	0	0	245	26	14.6727	0	568.636	663.409	9	0	0	10856.3	71.1846	0	0	0	3	0	7	16	9	0	0	0	0
13090.9	3	12.74	402.83	1	1	0	466	36	14.9318	1	720	780	7	0	0	14148	73.6615	0	0	0	6	0	1	9	7	0	0	0	0
7700	3	12.089	252.06	1	1	4	66	14	12.92	0	660	715	6	1	1	8974.62	67.6	1	0	4	3	0	4	14	9	0	0	0	0
25909.1	5	20.064	727.44	2	1	0	614	3	24.9818	0	780	910	9	0	0	33769	78.1154	1	0	0	7	0	6	20	14	0	0	0	0
20000	3	10.99	654.68	0	1	5	51	13	3.82909	0	654.545	763.636	12	0	0	20000.3	29.1	0	0	6	4	0	4	14	6	0	0	0	0
8400	3	13.779	292.47	1	2	4	379	32	33.6545	0	618.182	721.212	9	1	1	8465.54	41.1	0	0	4	7	0	6	10	6	0	0	0	1
10000	3	9.135	323.38	0	1	0	146	23	26.41	2	544.091	680.114	12	0	0	11406.9	59.6	0	0	0	5	0	4	23	12	0	0	0	1
9090.91	3	10.087	318.79	0	0	4	629	20	15.86	3	675	731.25	19	0	0	9494.77	56.5	0	0	4	13	0	16	21	11	0	0	0	0
9454.55	5	13.44	238.99	2	1	5	17	13	12.8836	0	585	633.75	11	0	0	1668.92	11.8	0	0	6	3	0	7	6	2	0	0	0	0
11818.2	3	16.555	346.9	1	1	0	141	13	10.6036	0	752.727	878.182	11	0	0	5034	85.3846	0	0	0	1	0	7	6	3	0	0	0	1
6000	3	14.661	194.16	0	0	5	342	21	9.70364	0	613.636	767.045	13	0	0	8156.62	32.6308	1	0	6	9	0	0	15	10	0	0	0	1
21818.2	3	6.633	608.72	0	2	0	119	0	21.9	0	568.636	663.409	24	0	0	54313.5	46.6154	1	0	0	10	0	11	38	22	0	0	0	0
23000	3	10.026	754.52	0	1	4	57	9	2.56091	0	705	881.25	13	0	0	24421.8	41.7	1	0	521	8	0	8	25	21	0	0	0	1
23090.9	3	7.26	787.31	1	1	0	17	13	9.84	0	745	869.167	17	1	0	28470	34.4615	0	0	0	4	0	6	14	8	0	0	0	0
22909.1	3	7.667	864.18	0	1	4	62	13	28.8636	0	796.364	929.091	20	0	0	355336	43.5077	0	0	4	11	0	14	31	17	0	0	0	0
27190.9	3	10.503	823.95	1	2	4	390	38	12.5273	0	568.636	710.795	11	0	0	25702.2	31.6615	1	0	4	5	0	1	30	20	0	0	0	0
21818.2	5	18.04	490.63	0	1	0	800	1	11.9909	0	589.091	638.182	22	0	0	19183.8	16.8	1	0	9718	5.69049	0.00142201	8.4678	14.659	8.09808	5	9777	1955.4	0
17454.5	3	5.616	488.5	0	0	4	221	8	7.06	0	617.727	772.159	6	0	0	14143	35.2615	0	0	4	2	0	11	13	7	0	2391	0	0
15409.1	5	18.205	347.64	0	0	4	184	26	30.8273	0	600	700	18	0	0	45828.5	81.5231	1	0	4	13	0	4	25	16	3	1869	560.7	0
9600	3	16.99	342.22	1	2	5	380	26	23.8091	0	763.636	827.273	4	0	0	6959.08	106.154	1	0	6	1	0.00142201	8	23	14	1	526	0	0
4909.09	3	5.32	180.69	0	0	2	290	18	7.57	0	815	950.833	9	0	0	3156	5.81538	0	0	5	3	0	2	13	11	2	1985	595.5	0
4909.09	3	8.253	191.28	0	1	4	617	9	8.86091	0	540	675	7	3	0	17945.8	41.8154	1	0	4	3	0	7	11	6	2	1100	220	0
23181.8	5	16.99	528.01	2	2	2	84	19	15.9545	3	774.545	968.182	16	0	0	2922.46	8.86154	1	0	3921	5	0	16	21	11	0	8078	0	0
5672.73	3	11.997	162.5	1	2	5	261	8	17.8036	1	540	585	11	0	0	6349.54	73.8769	0	0	6	3	0	9	7	4	0	968	0	0
13636.4	3	7.551	472.75	0	2	0	4	3	10.68	0	627.273	679.545	9	0	0	21350	78.1846	0	0	2	6	0	2	17	12	3	2532	506.4	0
34909.1	3	13.959	1073.44	0	2	0	91	7	11.9564	0	700	816.667	7	0	0	35625.7	49.1077	1	0	0	3	0	8	9	5	2	3062	306.2	0
13236.4	3	5.841	343.22	0	1	1	380	26	15.9955	0	700	875	16	0	0	24312	35.1923	0	0	1	3	0	28	21	18	1	2706	541.2	0
13000	3	11.165	420.39	1	2	0	124	13	12.8045	0	725	785.417	8	0	0	4155.85	18	0	0	0	5	0	1	7	4	3	5945	594.5	0
16000	5	10.07	340.51	0	1	2	560	44	10.9182	0	613.636	664.773	10	0	0	6685.54	10.7308	0	0	5	5	0	15	7	6	4	6599	0	0
4909.09	3	7.101	168.95	0	0	0	441	9	24.29	0	680	850	9	0	0	17595.8	67.6308	0	0	0	6	0	25	12	2	3	2199	439.8	0
24545.5	5	18.205	738.34	0	1	0	36	13	25.6173	0	568.636	663.409	22	0	0	45518	49.8462	0	0	0	14	0	5	33	19	2	12968	0	0
15272.7	5	20.405	431.66	2	2	2	36	13	21.78	2	568.636	616.023	8	0	0	5331.85	61.2769	0	0	5	5	0	5	6	4	3	4004	800.8	0
20000	3	13.98	683.36	0	1	0	31	2	26.0427	0	560.455	607.159	25	0	0	26001.2	53.7385	1	0	0	20	0	2	31	16	3	6727	2018.1	0
5318.18	3	15.99	158.19	1	1	5	205	8	21.99	0	752.727	878.182	17	0	0	11560.6	63.6	0	0	6	10	0	6	17	9	0	0	0	1
12272.7	3	7.9	469.36	1	0	0	263	0	21.6982	0	801.818	1002.27	11	0	0	30019.6	65.0462	1	0	25262	4	0	5	18	10	3	5010	1002	0
20681.8	5	21.472	458.99	1	0	4	418	45	13.77	0	627.273	679.545	10	0	0	24620.8	76.2	0	0	4	7	0	5	13	5	0	0	0	1
20454.5	5	14.99	594.62	0	1	0	218	0	12.0636	0	618.182	721.212	13	0	0	23326.2	71.0769	0	0	0	6	0	1	15	7	2	7468	2240.4	0
9454.55	3	16.99	370.74	0	1	2	104	23	30.2073	0	715	834.167	14	0	0	17591	35.6538	0	0	5	5	0	7	14	10	0	0	0	1
7200	3	12.617	237.33	0	0	4	686	37	26.3673	0	785.455	981.818	13	0	0	9593.08	42.4308	0	0	4	8	0	12	10	5	3	3379	337.9	0
4284.09	3	16.875	132.43	0	0	4	434	2	13.8436	0	725.455	785.909	13	0	0	6140	90.8077	1	0	159	12	0	1	32	26	0	0	0	0
16363.6	5	15.61	482.23	0	2	4	19	14	11.3455	0	618.182	772.727	7	1	1	21609.5	59.4	1	0	605	5	0	6	6	2	0	0	0	0
19090.9	3	14.661	741.31	0	0	0	64	14	17.1736	0	752.727	878.182	10	0	0	32989.4	47.8154	0	0	0	5	0	3	16	8	0	0	0	0
11818.2	3	6.92	400.93	1	1	0	289	16	14.7436	0	681.818	795.455	10	0	0	5535.69	16.3846	1	0	38	5.69049	0.00142201	8.4678	14.659	8.09808	0	0	0	0
15000	5	16.99	372.71	2	1	2	244	14	15.6	6	564.545	658.636	13	0	0	1929.23	14	0	0	5	3	0	32	17	9	0	0	0	0
15000	3	8.496	480.08	0	0	5	4	3	27.0909	0	654.545	763.636	13	0	0	40788	73.6615	1	0	6	7	0	7	9	4	0	0	0	0
9900	3	18.75	361.65	0	0	2	215	8	20.0182	2	556.364	695.455	9	0	0	9987.69	75.1692	1	0	289	5	0	3	17	7	0	0	0	1
28636.4	5	25.506	1096.95	0	1	0	465	19	12.1255	0	725.455	785.909	8	2	2	3081.92	18.6308	0	0	0	3	0	8	10	7	0	0	0	1
15709.1	5	15.99	466.81	0	0	0	162	2	29.7909	0	580.909	629.318	17	0	0	46340.8	76.4615	0	0	0	8	0	10	21	12	0	0	0	1
15545.5	3	15.389	649.29	1	2	0	619	11	20.8	0	725.455	846.364	12	0	0	10879.6	50.1923	0	0	0	8	0	15	16	5	0	0	0	1
2727.27	3	18.24	108.82	1	0	10	221	8	17.6091	0	636.364	742.424	10	0	0	8713.38	89.8154	0	0	11	4	0	6	6	4	0	0	0	0
10500	3	22.825	394.25	0	1	2	750	2	11.03	0	572.727	668.182	5	0	0	1063	24.7	1	0	5	2	0	6	3	2	0	0	0	0
23163.6	5	17.568	514.06	0	1	0	237	32	25.55	0	675	731.25	23	0	0	47755.1	80.2308	1	0	0	18	0	18	29	19	0	0	0	1
8272.73	3	11.44	230.64	1	1	0	72	10	12.88	0	580.909	629.318	8	0	0	2957.54	47.1	0	0	0	2	0	2	7	4	0	0	0	0
12000	3	12.837	396.69	1	1	4	4	3	18.4145	0	627.273	679.545	11	0	0	14883	70.2	0	0	4	7	0	4	18	12	0	0	0	0
9927.27	3	12.617	276.88	0	2	2	512	21	34.17	0	736.364	920.455	20	1	0	10147	16.3	0	0	5	7	0	15	22	11	0	0	0	0
8590.91	3	16.797	274.04	1	0	0	136	8	21.9909	0	736.364	920.455	9	0	0	15135	98.7538	1	0	61387	5.69049	0.00142201	8.4678	14.659	8.09808	0	0	0	0
1500	3	7.91	46.95	0	0	2	31	2	0.785455	1	752.727	940.909	10	0	0	2301.92	31.2	0	0	5	2	0	24	8	4	0	0	0	0
7272.73	3	9.99	258.1	0	1	0	213	3	13.1973	0	720	840	7	0	0	8263.38	74.3077	0	0	0	4	0	3	7	2	0	0	0	0
9090.91	3	10.99	327.34	2	0	0	224	3	12.2645	0	758.182	884.545	11	0	0	8166.46	56.3231	1	0	0	8	0	1	11	3	0	0	0	0
21818.2	3	8.19	628.49	1	1	0	202	27	7.76727	0	685	799.167	6	1	1	5030.31	66.7	0	0	0	1	0	6	8	7	0	0	0	0
21272.7	5	8.991	382.36	0	1	4	61	31	21.66	0	564.545	705.682	11	0	0	14471	67.8462	0	0	4	7	0	24	18	7	0	0	0	0
4254.55	3	14.839	122.15	0	1	0	215	8	6.20182	0	769.091	897.273	5	1	1	83	1.29231	1	0	0	2	0	9	9	9	0	0	0	0
17454.5	3	13.545	555.04	0	2	2	104	23	4.18182	0	564.545	611.591	9	0	0	8179.23	58.9	0	0	5	3	0	10	7	4	0	0	0	0
12727.3	3	12.001	457.75	0	1	0	165	17	3.74727	0	665	831.25	8	1	0	7413.23	56.1231	0	0	0	6	0	0	7	4	0	0	0	0
9090.91	3	6	308.23	1	0	4	731	0	20.64	0	631.818	737.121	17	0	0	17036.3	76.7077	0	0	4	6	0	13	11	6	0	0	0	0
10363.6	3	14.33	326.22	0	0	0	435	36	7.29818	3	747.273	871.818	12	0	0	4566.46	66	1	0	50067	6	0	6	14	14	0	0	0	0
12727.3	3	11.997	473.95	0	2	0	176	3	18.5236	0	552.273	598.295	6	0	0	10126.2	66.1846	1	0	0	4	0	18	10	6	0	0	0	0
13090.9	3	15.31	417.81	1	0	4	612	7	21.7	0	622.727	778.409	9	0	0	11015	93.3	1	0	38	6	0	6	10	9	0	0	0	0
22159.1	5	9.99	517.78	1	0	0	172	13	17.0818	0	690.909	748.485	13	0	0	4829	21.7	0	0	0	3	0	16	7	4	0	0	0	0
9200	3	5.32	277.06	0	0	0	480	8	12.7227	0	850.909	1063.64	11	0	0	5718	13.2692	0	0	0	2	0	12	9	5	0	0	0	0
7090.91	3	5.32	180.69	0	0	4	431	20	27.7636	0	705	881.25	22	0	0	34169.7	41.8154	0	0	4	5	0	11	25	16	0	0	0	0
8272.73	3	12.49	234.15	2	0	4	480	8	15.12	0	544.091	680.114	18	0	0	10549.6	32.4923	1	0	4	11	0	3	32	16	0	0	0	0
11818.2	3	10.791	332.1	1	2	0	108	21	20.7164	0	556.364	649.091	11	1	1	7067.85	33.1385	0	0	0	3	0	7	13	6	3	228	68.4	0
27000	5	17.27	824.94	0	2	0	186	9	27.3364	0	685	856.25	23	0	0	42169.1	63.8	1	0	212	7	0	20	16	5	0	8736	873.6	0
12272.7	3	7.092	469.21	0	0	3	165	17	5.94	0	713.636	892.045	6	0	0	17800.4	51.5769	1	0	71	5.69049	0.00142201	8.4678	14.659	8.09808	2	2953	0	0
18909.1	3	13.536	554.96	1	2	4	629	20	18.9818	0	593.182	741.477	7	0	0	4044	23.2	1	0	4	3	0	3	4	3	0	0	0	1
19545.5	3	6.633	654.37	0	2	0	629	20	18.36	0	790	855.833	8	0	0	10362	16.9846	1	0	0	2	0	6	16	12	3	673	67.3	0
9090.91	3	6.864	305.31	1	0	0	480	8	5.4	0	601.364	651.477	11	0	0	7784	19.6	1	0	0	4	0	1	21	16	3	3469	346.9	0
3000	3	12.683	98.98	2	2	0	751	16	31.93	0	834.545	904.091	16	0	0	4571	16.3846	1	0	0	4	0	7	15	12	2	684	205.2	0
13636.4	3	11.421	503.18	1	1	4	230	2	37.5	0	627.273	679.545	21	0	0	16001.5	63.9692	0	0	4	12	0	12	14	9	0	0	0	1
25675	3	7.62	676.99	0	2	5	539	42	14.0273	0	681.818	738.636	9	0	0	1657	15.5769	1	0	56322	5.69049	0.00142201	8.4678	14.659	8.09808	2	6356	0	0
27050	5	10.99	588	0	2	0	172	13	18.26	0	650.455	813.068	8	0	0	623.077	1.73077	0	0	15897	4	0	13	14	8	3	10703	3210.9	0
20000	3	24.74	792.45	1	1	0	300	9	15.2509	0	540	585	6	3	1	23506	84.4308	0	0	0	3	0	5	8	8	3	6991	0	0
9090.91	3	11.53	329.91	1	1	4	185	3	9.73	1	544.091	680.114	8	0	0	9605.77	50.8	1	0	4	2	0	12	8	6	3	3918	1175.4	0
6000	3	11.49	197.83	0	0	4	304	8	13.0364	0	627.273	784.091	8	0	0	16485	80.4231	1	0	4	5	0	5	12	11	2	2062	0	0
21272.7	3	13.67	612.32	0	1	0	245	26	10.3273	0	548.182	685.227	7	1	1	10296.9	72.8	1	0	0	3	0	3	12	10	2	4864	486.4	0
16909.1	5	18.25	474.86	0	2	2	542	14	29.3673	0	609.091	761.364	8	1	1	5914.46	69.2308	0	0	5	5	0.00142201	11	26	19	0	0	0	1
13438.6	5	25.608	465.68	1	2	12	736	31	27.24	0	780	845	10	0	0	15145.4	57.7231	1	0	5289	5	0	3	9	5	4	649	194.7	0
14890.9	3	7.832	389.75	0	0	4	19	14	26.9545	0	796.364	995.455	14	0	0	14003.2	28	0	0	4	3	0	9	20	15	1	1592	159.2	0
4200	3	12.49	140.49	1	0	4	139	8	40.6691	0	650	812.5	18	0	0	11013	34.0615	1	0	4	6	0	10	16	7	3	1792	179.2	0
20000	5	8.253	458.51	0	0	4	162	2	7.91	0	790.909	922.727	10	0	0	12781	16.5231	0	0	4	6	0	5	20	9	0	0	0	0
17727.3	5	13.99	348.95	0	1	4	76	26	15.3	1	665	831.25	16	0	0	12686	50.6769	0	0	4	10	0	13	18	5	0	0	0	0
15000	3	17.82	528.84	0	0	4	512	21	26.31	0	736.364	920.455	6	0	0	14388.5	62.8615	1	0	4	4	0	10	10	4	0	0	0	0
11345.5	3	18.997	343.56	0	1	1	545	19	19.9391	0	609.091	710.606	21	0	0	18035.1	59.7	0	0	1	10	0	15	15	9	0	0	0	0
20568.2	3	6.39	692.31	0	2	0	73	23	12.7818	0	725	785.417	23	0	0	33867.1	56.8615	1	0	0	5	0	42	20	11	0	0	0	0
18181.8	5	10.087	416.82	0	1	4	310	24	19.95	1	668.182	835.227	8	0	0	26648.5	81.4	0	0	4	4	0	8	12	7	0	0	0	0
11515.9	3	11.48	464.04	1	2	0	491	30	14.8455	0	790.909	922.727	10	0	0	21341.5	45.8769	1	0	70	5.69049	0.00142201	8.4678	14.659	8.09808	0	0	0	1
24981.8	3	15.906	787.8	0	0	0	143	8	24.21	0	690	747.5	14	0	0	31121.5	82.5	0	0	0	11	0	4	18	14	0	0	0	1
8213.64	3	15.22	241.68	0	2	2	484	21	31.1564	2	747.273	809.545	9	0	0	2007.69	23.9077	1	0	70	3	0	4	7	3	0	0	0	0
15272.7	3	14.616	493.86	2	1	0	47	17	23.5718	0	552.273	644.318	9	0	0	7189.54	55.3846	1	0	0	6	0	7	7	5	0	0	0	0
10150	3	12.089	332.25	1	0	4	131	6	12.0273	0	548.182	639.545	3	0	0	3059.08	93.9077	0	0	4	2	0	3	11	10	0	0	0	0
11675	3	6.03	355.34	1	0	0	390	13	9.47	0	625.909	730.227	12	0	0	9811.38	18.4154	1	0	0	4	0	13	8	5	0	0	0	0
26529.5	5	16.425	827.8	1	1	0	297	18	17.2182	0	725.455	846.364	11	1	1	14208.9	74.7692	0	0	0	8	0.00142201	12	49	28	0	0	0	0
43636.4	5	21.912	1057.98	0	1	0	75	33	27.16	2	710	887.5	16	0	0	16011.7	34.7	0	1	0	7	0	14	22	8	0	0	0	0
23427.3	5	16.99	533.6	0	1	4	500	27	29.1273	0	580.909	629.318	9	0	0	33602.2	94.3385	1	0	4	5	0	7	9	4	0	0	0	0
9818.18	3	10.076	286.87	0	1	3	204	24	15.1855	0	660	770	6	1	0	4920.92	42.4615	0	0	3	2	0	12	11	6	0	0	0	0
21818.2	3	11.691	673.79	1	2	4	277	8	12.66	0	680	736.667	16	0	0	19853.5	111.231	1	0	4	4	0	9	11	8	0	0	0	0
17454.5	5	15.389	372.21	0	2	4	553	27	28.3964	0	715	893.75	10	0	0	24233	86.3692	1	0	56111	5.69049	0.00142201	8.4678	14.659	8.09808	0	0	0	0
8727.27	3	17.919	282.41	0	0	7	139	8	21.0091	0	572.727	620.455	8	0	0	17179	63.2	1	0	8	4	0	7	7	2	0	0	0	0
11818.2	3	13.882	335.12	1	2	0	141	13	21.1091	3	730.909	913.636	27	0	0	26290.4	62.3	1	0	0	12	0	2	42	11	0	0	0	1
24000	5	10.076	500.07	1	1	0	216	8	16.4073	1	763.636	827.273	8	0	0	18228	50.5846	0	0	0	4	0	2	10	7	0	0	0	0
5454.55	3	12.683	164.96	0	0	7	447	30	20.8	0	650	812.5	10	0	0	48169.7	79.8	1	0	8	7	0	2	15	12	0	0	0	0
5454.55	3	15.05	173.45	1	0	9	547	46	2.16818	0	665	720.417	3	0	0	2349.23	95.3077	0	0	10	2	0	0	2	2	0	0	0	0
7975	3	11.49	262.95	0	0	3	4	3	19.83	0	645.455	699.242	17	0	0	5351.08	35.4231	1	0	3	3	0	15	7	3	0	0	0	1
20945.5	5	11.421	433.82	2	0	4	97	12	20.5	0	670	725.833	13	1	1	8232.69	25.6308	0	0	4	5	0	13	20	6	0	0	0	0
27272.7	3	5.852	903.45	0	1	2	203	30	2.14545	0	625.909	782.386	10	0	0	28527.7	39.6	0	0	5	1	0	6	10	5	0	0	0	0
28800	3	20.31	1074.87	0	2	0	64	14	10.3364	0	685	799.167	16	0	0	20081	62.5846	1	0	36222	10	0	10	19	8	0	0	0	0
10909.1	3	14.895	425.16	0	2	0	535	17	35.92	0	618.182	772.727	21	0	0	30394.2	89	0	0	0	12	0.00142201	10	29	13	0	0	0	0
5890.91	3	12.837	238.01	1	0	0	490	44	24.7364	0	540	675	32	0	0	6443.08	83.1	1	0	0	4	0	45	6	4	0	0	0	0
7272.73	3	10.296	263.58	0	0	0	240	21	7.41818	0	801.818	935.455	4	0	0	7269.23	105.692	1	0	0	2	0	2	3	3	0	0	0	0
13000	3	7.89	406.72	1	0	0	134	8	23.7845	0	627.273	731.818	28	0	0	21600.9	36.4615	0	0	0	11	0	7	36	13	0	0	0	0
8000	3	16.875	292.24	2	0	4	251	8	17.5855	0	548.182	639.545	12	0	0	12382.2	80.4	1	0	28	10	0	4	17	13	0	0	0	1
32025	5	29.689	977.71	1	1	0	205	8	11.0818	0	640.909	747.727	12	3	0	1842.46	5.16923	0	0	0	4	0	5	11	9	0	0	0	0
7854.55	3	7.803	303.81	0	2	4	671	13	19.7564	0	675	787.5	19	1	1	18312	60	1	0	4	12	0	4	26	8	0	1624	162.4	0
23000	5	13.014	540.68	1	2	4	56	8	13.7618	0	695	752.917	8	0	0	17975.1	79.2	0	0	2	6	0	1	10	4	3	1427	285.4	0
21522.7	3	14.663	801.48	1	1	0	143	8	20.9909	0	769.091	897.273	12	0	0	32205.2	91.9615	0	0	0	9	0	3	24	12	3	2319	695.7	0
15272.7	3	9.891	458.28	0	1	0	242	8	5.51818	0	589.091	638.182	15	0	0	31037.5	30.1846	1	0	868	6	0	3	20	11	3	2910	291	0
8272.73	3	13.739	234.15	1	0	0	143	8	23.8582	1	747.273	934.091	16	0	0	13065.2	57.3	1	0	0	12	0	5	30	10	1	1844	553.2	0
15431.8	5	24.99	498.14	1	1	3	365	19	11.11	0	600	750	5	1	1	69.2308	0.9	1	0	3	1	0	6	9	7	0	0	0	1
20681.8	5	21.109	455.8	1	1	0	195	38	21.5455	1	580.909	629.318	4	0	0	3736	29.1846	1	0	0	2	0	3	15	11	0	0	0	1
4363.64	3	12.12	133.09	1	0	2	25	13	19.2545	0	568.636	710.795	6	0	0	4941.92	44.5385	1	0	5	5.69049	0.00142201	8.4678	14.659	8.09808	2	1065	0	0
16250	3	14.96	476.39	1	0	0	391	0	26.3127	0	548.182	593.864	12	0	0	14540.6	58.1538	1	0	71	5.69049	0.00142201	8.4678	14.659	8.09808	3	3125	937.5	0
8181.82	3	21.06	389.19	0	0	2	0	0	25.44	0	725	845.833	11	0	0	24582	63.5	0	0	5	4	0	9	15	9	0	0	0	1
8597.73	3	17.09	259.7	0	1	4	841	42	13.6	0	564.545	705.682	14	1	0	5147.69	31.1538	0	0	4	12	0.00142201	7	13	10	1	3108	0	0
5072.73	3	7.35	192.44	2	1	0	840	22	11.05	0	681.818	795.455	3	0	0	1545	19.8	0	0	0	2	0	3	5	2	0	2716	814.8	0
10909.1	3	15.763	412.06	1	2	0	143	8	7.24364	0	650	758.333	5	0	0	12600	76.3385	0	0	269	4	0	10	14	11	0	0	0	1
21818.2	3	13.849	803.93	0	0	0	418	45	27.04	5	720	900	14	0	0	23666.5	64.1846	0	0	0	10	0	14	16	8	3	1547	154.7	0
14181.8	5	16.555	285.8	1	1	0	127	13	26.24	0	780	975	10	0	0	9523	21.6923	0	0	0	6	0	23	8	6	0	0	0	1
13472.7	5	14.688	279.17	1	2	0	57	9	16.93	0	544.091	634.773	20	0	0	38189	67.9385	1	0	77	5.69049	0.00142201	8.4678	14.659	8.09808	5	886	88.6	0
1363.64	3	18.06	54.28	0	0	3	375	2	18.2291	0	818.182	954.545	7	0	0	4893.46	28.8615	1	0	3	1	0	8	7	2	0	0	0	0
10000	3	9.79	349.29	1	2	4	852	41	20.4436	0	568.636	616.023	9	1	1	11475	85.0385	1	0	4	4	0	9	7	7	0	0	0	0
9818.18	3	10.377	296.92	1	1	5	286	16	17.3291	0	600	650	10	1	0	6477.69	45.9231	0	0	6	7	0	6	14	4	0	0	0	0
22909.1	5	12.87	655.88	0	2	0	178	23	5.94	0	695	810.833	9	0	0	29079.1	65.2615	1	0	28	6	0	9	20	14	0	0	0	0
4545.45	3	7.362	157.1	1	0	0	51	13	4.43455	0	560.455	653.864	3	0	0	8079	79.0462	0	0	0	3	0	5	4	2	0	0	0	0
14127.3	5	20.99	350.27	0	1	0	404	22	14.7273	0	600	700	9	0	0	16153.8	65.9077	0	0	0	7	0	3	13	6	0	0	0	1
12113.6	3	13.032	352.72	1	1	4	4	3	34.3455	0	568.636	616.023	7	0	0	11988.5	79.3692	0	0	4	4	0	25	11	8	0	0	0	0
17454.5	5	11.151	359.08	0	0	0	247	32	10.1	0	564.545	658.636	10	1	1	6631.38	24.5538	0	0	0	4	0	7	6	5	0	0	0	0
1636.36	3	15.73	68.65	0	1	0	238	22	9.16364	0	552.273	644.318	7	0	0	2491	11.9077	1	0	613	5	0	3	5	3	0	0	0	0
8181.82	3	10.251	329.24	1	1	4	359	43	32.9564	0	556.364	695.455	11	5	0	9412.31	65.3692	0	0	4	7	0	9	21	9	0	0	0	0
29645.5	3	16.875	992.7	0	2	4	36	13	23.4491	0	741.818	803.636	13	0	0	15034.9	58.7	1	0	4	6	0	8	11	5	0	0	0	0
15000	3	10.377	494.86	0	0	0	195	38	13.2791	0	675	787.5	12	0	0	11613.5	42.5	1	0	0	3	0	15	24	5	0	0	0	1
23636.4	3	7.21	619.47	1	0	0	157	8	12.17	0	609.545	660.341	17	1	1	11642.3	18.1154	0	0	0	8	0	3	24	16	0	0	0	0
25090.9	3	10.42	746.69	0	1	0	27	12	12.9055	0	812.727	948.182	6	0	0	8145	45.6	1	0	0	2	0	5	7	6	0	0	0	0
19027.3	3	12.303	547.69	1	2	4	17	13	35.44	0	710	828.333	5	0	0	15966	40.4	0	1	4	5	0	0	5	2	0	0	0	0
11020.5	3	21.472	344.28	1	1	0	504	11	13.71	1	725.455	846.364	8	0	0	6064.15	71.3	1	0	0	5	0	2	8	3	0	0	0	0
19090.9	3	7.9	657.1	1	2	0	266	31	24	8	675	843.75	18	0	0	22915.4	81.6308	1	0	191	6	0	24	12	7	0	0	0	0
41363.6	3	20.889	1282.79	0	2	0	152	14	16.6036	0	660	770	7	1	1	6613.38	42.1	0	0	0	2	0	15	11	6	0	0	0	0
2272.73	3	19.99	92.9	1	2	10	193	13	1.35	0	613.636	715.909	1	0	0	350.769	35.0769	0	0	11	1	0	0	9	4	0	0	0	0
20727.3	5	13.18	434.07	0	1	0	397	35	12.3909	0	758.182	947.727	12	0	0	20043	52.1	0	0	0	7	0	4	18	10	0	0	0	0
12272.7	3	8.18	471.3	0	0	0	228	24	12.3	1	568.636	663.409	14	0	0	18268.6	37.1538	0	0	0	9	0	3	19	9	0	0	0	0
17454.5	3	9.945	524.2	1	1	2	31	2	16.7364	0	750	875	6	0	0	1264.31	6.67692	0	0	5	2	0	10	13	8	0	0	0	0
17000	3	9.891	556.48	1	1	4	697	39	21.4282	0	720	840	10	1	0	19532.3	94.3846	0	0	4	9	0	9	14	10	0	0	0	0
30545.5	5	19.789	710.87	0	2	4	89	3	27.5018	0	585	682.5	15	0	0	40783.1	62.4615	0	0	4	7	0	8	16	12	0	0	0	0
8181.82	3	11.49	329.72	0	1	4	80	21	20.1636	0	613.636	664.773	7	0	0	3171.54	42.8615	0	0	4	4	0	6	5	4	0	0	0	1
24545.5	3	15.389	1025.19	1	1	2	89	3	8.61818	1	540	675	8	0	0	5957.54	45.9846	1	0	5	4	0	4	6	3	0	0	0	1
22340.9	3	20.339	894.5	1	2	0	497	8	23.9182	0	736.364	920.455	19	0	0	24646.5	87.1154	1	0	0	14	0	7	26	14	0	0	0	1
15363.6	5	12.204	299.53	0	1	0	297	18	14.7273	0	700	875	7	0	0	27111.7	65.2615	0	0	0	4	0	9	7	2	0	0	0	0
3600	3	15.59	115.36	1	2	3	213	3	12.9182	0	685	856.25	7	1	1	3583.85	40.8154	1	0	3	3	0	20	11	9	0	0	0	0
10909.1	3	9.79	317.54	1	1	1	54	28	16.3555	0	720	780	9	0	0	22575	64.3	1	0	61311	5.69049	0.00142201	8.4678	14.659	8.09808	0	0	0	0
30254.5	3	14.99	887.31	0	1	0	214	41	42.8073	0	576.818	721.023	29	0	0	13947.2	22.1	1	0	0	9	0	25	24	10	0	0	0	0
13950	5	23.298	378.81	0	1	0	330	21	17.67	0	695	810.833	13	0	0	12189.2	111.808	1	0	0	5	0	9	6	2	0	0	0	1
2181.82	3	11.241	66.9	0	0	0	228	24	21.9682	0	636.364	795.455	21	0	0	2079.69	38.7692	0	0	0	4	0	32	11	7	0	0	0	0
13636.4	3	7.614	473.24	2	1	5	4	3	30.3055	0	650	758.333	15	0	0	8119.62	11.7231	1	0	6	6	0	10	21	10	3	5466	1639.8	0
10872.7	3	13.023	316.54	0	1	0	194	38	15.6818	0	618.182	772.727	8	3	3	9920.62	31.9	0	0	0	4	0	2	8	7	0	4580	458	0
9818.18	3	11.14	393.67	1	2	4	141	13	29.5	0	675	731.25	16	0	0	14531	73.7692	1	0	45411	10	0	21	24	14	0	0	0	0
33090.9	5	15.939	658.65	0	0	0	285	14	26.0182	0	710	828.333	9	0	0	37986	89.4462	1	0	0	3	0	28	16	9	0	0	0	0
4500	3	10.47	178.69	0	0	0	507	19	6.77	0	665	831.25	3	1	1	749	18.7	0	0	0	1	0	3	6	3	0	0	0	0
41363.6	5	12.69	790.82	2	1	4	129	30	17.7727	0	613.636	664.773	22	0	0	69695	44.0308	0	0	4	10	0	7	27	19	0	0	0	1
5727.27	3	9.819	228.88	1	0	0	230	2	13.44	0	556.364	649.091	20	0	0	11999.1	28.3231	0	0	0	8	0	7	21	10	0	0	0	0
5909.09	3	12.001	163.49	0	1	0	104	23	6.16909	0	741.818	927.273	4	1	1	3640	47.2769	0	0	0	2	0	2	3	2	0	0	0	1
10636.4	3	9.441	422.48	0	1	2	536	23	6.90545	0	659.091	714.015	12	2	1	8294	19	1	0	5	4	0	4	9	7	0	0	0	0
9090.91	3	9.17	318.79	1	0	4	171	8	8.01818	0	680	850	11	1	1	5569	36.6154	1	0	4	10	0.00142201	5	32	12	0	0	0	0
11227.3	3	6.864	290.05	0	1	0	618	46	7.37273	0	572.727	668.182	6	0	0	14892.9	50.5077	0	0	0	4	0	7	12	7	0	0	0	0
8509.09	3	4.788	216.83	1	0	5	185	3	14.1818	0	796.364	995.455	17	0	0	10148.1	28.7308	0	0	6	7	0	22	8	5	0	0	0	0
5909.09	3	12.001	163.49	0	1	2	253	21	13.0036	0	741.818	865.455	9	0	0	5069.08	45.6923	0	0	5	4	0	7	7	4	0	0	0	1
26181.8	5	15.05	571.59	2	2	4	29	19	23.0155	0	705	763.75	20	2	0	31406.8	40.8	0	0	4	8	0	12	15	9	0	0	0	0
17727.3	5	30.041	460.82	0	2	0	156	18	16.7564	0	685	856.25	11	0	0	19052.3	37.4769	0	0	0	6	0	3	10	5	0	0	0	0
9090.91	5	13.99	232.64	0	0	0	120	21	23.3755	0	552.273	598.295	13	0	0	14561.5	78.2308	1	0	0	6	0	6	20	10	0	0	0	0
16363.6	3	11.49	659.43	2	2	4	32	21	7.38545	0	741.818	803.636	9	0	0	11774.8	22.5	0	0	4	5	0	1	9	7	0	0	0	1
10045.5	3	16.99	303.01	2	1	0	476	5	21.72	0	670	725.833	4	0	0	31283.1	112.385	1	0	0	4	0	1	5	2	0	0	0	0
16363.6	5	12.096	459.58	0	0	4	167	8	16.64	1	736.364	797.727	11	0	0	23502.7	95.4154	0	0	4	3	0	25	16	12	0	0	0	0
5909.09	3	9.44	160.03	2	0	4	134	8	11.9618	0	763.636	954.545	13	0	0	4990	13.9615	1	0	4	5	0	9	20	11	0	0	0	0
4727.27	3	8.991	129.05	1	0	2	51	13	19.9964	0	725.455	785.909	11	1	0	8351	65.5385	1	0	5	8	0	5	17	11	0	0	0	0
26181.8	5	22.429	641.08	0	2	0	184	26	13.5091	0	670	725.833	5	0	0	6154.62	82.0385	0	0	0	3	0	2	7	6	0	0	0	1
7772.73	3	9.17	302.85	1	1	0	160	4	18.16	0	604.545	705.303	13	1	1	18624	50.2923	1	0	0	9	0	11	25	16	0	0	0	1
38181.8	5	20.99	946.68	0	2	0	196	14	18.7527	0	675	731.25	12	0	0	13177	68.2769	0	0	0	7	0	10	9	3	0	0	0	0
17490.9	3	4.788	445.7	0	0	4	146	23	12.05	0	617.727	669.205	12	0	0	17115.5	26.6769	1	0	4	6	0	5	16	8	0	0	0	0
21600	5	15.102	652.99	0	2	0	173	32	16.1427	0	572.727	668.182	13	0	0	18244.6	64.6154	0	0	28	4	0	12	26	16	0	0	0	0
20018.2	5	18.99	475.91	2	1	2	290	18	3.01909	2	540	630	5	0	0	8052.15	64.9385	0	0	5	3	1	9	13	8	0	0	0	0
6000	3	10.332	197.8	0	1	4	112	23	14.9273	0	685	856.25	13	2	1	9738.62	58.9615	0	0	4	6	0	8	15	7	0	0	0	1
1181.82	3	24.5	39.5	1	0	10	123	12	21.7818	0	609.091	761.364	12	0	0	37778.1	92.1231	1	0	11	7	0	17	28	14	0	0	0	0
10636.4	3	8.24	306.62	2	1	0	764	47	14.45	0	665	775.833	16	0	0	16087	39.2	1	0	0	7	0	17	24	13	0	0	0	0
10909.1	3	11.44	329.48	0	1	2	54	28	7.63364	2	690	747.5	8	0	0	3780	74.5	0	0	5	4	0	2	12	8	0	0	0	1
20509.1	3	7.11	588.26	2	2	0	160	4	5.71636	0	750	875	12	0	0	11014.6	15.2923	1	0	21414	4	0	1	27	20	0	0	0	0
8000	3	6.363	247.28	1	0	0	622	7	6.94	1	668.182	835.227	10	0	0	8052	14	0	0	0	7	0	3	22	14	0	0	0	1
27625	5	26.521	673.95	0	1	0	5	4	9.57273	0	710	887.5	15	1	1	14060.3	36.6923	0	0	0	7	0	9	15	9	0	0	0	0
28363.6	3	8.69	750.97	0	2	0	306	26	22.8218	0	585	633.75	14	0	0	21983.1	81.1385	0	0	0	7	0	10	14	11	0	0	0	0
11345.5	3	12.99	323.42	0	1	2	428	9	18.2291	0	552.273	644.318	17	2	1	9511	43.3846	1	0	5	8	0	5	21	13	0	0	0	0
4400	3	17.171	153.85	0	2	0	556	10	24.1909	0	564.545	611.591	12	1	1	7326	39.2	0	0	0	7	0	1	12	9	0	0	0	0
8727.27	3	11.421	268.36	1	1	0	111	8	20.8255	0	544.091	680.114	7	0	0	11480	97.8	1	0	0	3	0	7	13	10	0	0	0	0
11818.2	3	8.091	317.96	0	0	4	464	37	15.3982	0	622.727	726.515	19	0	0	7171	11.3077	1	0	4	11	0	7	30	12	0	0	0	0
12272.7	3	10.341	494.57	0	1	4	78	19	17.5273	0	604.545	654.924	23	1	0	14513.7	47.9231	1	0	4	10	0	7	41	20	0	0	0	0
17018.2	5	20.394	400.74	1	1	0	362	35	18.9	0	670	837.5	26	0	0	10742.8	69.7846	1	0	0	9	0	36	32	15	0	0	0	1
18909.1	3	7.62	498.59	0	2	0	559	17	17.5636	0	769.091	961.364	14	0	0	54474.5	45.9231	1	0	28	5	0	14	14	7	0	0	0	0
8120.45	3	10.99	324.89	0	1	4	29	19	19.0555	0	631.818	737.121	7	0	0	10719.2	74.3077	1	0	4	3	0	11	27	12	0	0	0	0
5727.27	3	11.583	235.44	0	0	5	108	21	19.7345	0	747.273	934.091	9	0	0	89844	84.8	1	0	18136	5.69049	0.00142201	8.4678	14.659	8.09808	0	0	0	0
13177.3	3	14.049	389.86	1	1	0	176	3	22.1636	0	720	840	11	2	1	6723.69	57.5077	1	0	0	7	0	26	9	4	0	0	0	0
9454.55	3	15.61	279.72	0	2	4	682	2	43.1455	0	660	825	27	1	1	30239	79	1	0	4	17	0.00142201	12	25	7	0	0	0	0
29900	5	20.466	709.45	1	1	0	166	8	21.5636	0	785.455	981.818	8	0	0	12745.4	36.1846	0	0	0	6	0	2	7	5	0	0	0	0
8181.82	5	10.251	219.38	0	0	0	139	8	8.4	0	747.273	934.091	10	0	0	9284	59.5385	0	0	0	6	0	8	18	4	0	0	0	0
2000	3	14.971	67.98	1	2	0	0	0	8.32	0	640.909	694.318	3	0	0	4952.31	105.346	1	0	13887	5.69049	0.00142201	8.4678	14.659	8.09808	0	0	0	0
22454.5	5	17.86	481.03	1	1	0	51	13	11.93	0	680	736.667	5	0	0	5874.62	50.3077	1	0	0	4	0	5	7	7	0	0	0	0
9818.18	3	11.396	389.24	1	2	0	777	8	14.44	0	763.636	954.545	12	0	0	46198.8	100.846	1	0	11810	5.69049	0.00142201	8.4678	14.659	8.09808	0	0	0	0
8181.82	3	7.39	310.56	1	1	4	703	8	26.71	0	650	812.5	5	0	0	9679.38	66.3385	0	0	4	4	0	2	4	2	0	0	0	1
19636.4	3	9.229	756.4	0	1	0	514	13	15.0818	0	585	682.5	16	0	0	28001	49.8	1	0	0	9	0	12	22	11	0	0	0	0
8181.82	3	15.291	356.48	1	1	6	255	9	13.0091	0	609.091	659.848	9	0	0	14578	47.1923	0	0	7	6	0	0	12	10	0	0	0	1
4581.82	3	18.205	198.41	1	1	0	124	13	17.19	0	609.091	659.848	12	0	0	15582.7	33.2308	1	0	0	9	0	8	10	7	0	0	0	0
14890.9	5	11.165	268.65	0	0	0	95	13	16.75	0	801.818	1002.27	16	0	0	20013.5	33.8154	0	0	0	7	0	15	17	9	0	0	0	0
26181.8	5	16.641	615.86	1	2	0	111	8	36.3927	2	564.545	705.682	9	0	0	10095	43.7	0	0	0	5	0	15	8	3	0	0	0	1
13090.9	3	10.681	514.1	0	0	0	113	22	15.8182	0	572.727	715.909	7	0	0	11028.8	64.8	0	0	0	4	0	10	8	4	0	0	0	0
22690.9	3	11.49	633.05	1	1	0	32	21	15.58	0	710	769.167	16	0	0	11995.4	39.9	1	0	2	8	0	1	15	10	0	0	0	0
19500	3	5.616	503.76	1	0	0	188	23	14.9818	0	780	975	11	0	0	8617.54	50.4231	1	0	0	4	0	18	7	4	0	0	0	0
32727.3	3	19.03	1100.14	1	1	4	225	18	5.53091	0	645.455	806.818	5	0	0	4119.69	38.1923	0	0	4	4	0	0	6	2	0	0	0	1
28363.6	5	11.511	543.5	1	1	1	185	3	18.8836	0	807.273	874.545	11	0	0	7223.08	13.7	0	0	1	1	0	26	15	8	0	0	0	1
5909.09	3	7.89	156.43	0	1	2	512	21	23	0	560.455	653.864	17	0	0	40871.5	71.0769	0	0	5	9	0	9	19	11	0	0	0	0
5454.55	3	10.341	197.83	1	2	0	492	36	31.8436	0	556.364	602.727	12	0	0	7987	69.5	0	0	0	4	0	10	9	5	0	0	0	0
29545.5	3	4.788	752.87	1	1	0	459	8	22.5455	0	685	799.167	10	8	0	26273	65.2	0	0	0	6	0	2	13	11	0	0	0	0
10909.1	5	16.074	303.81	0	2	0	792	13	35.4	0	544.091	634.773	8	1	1	3360	34.1538	0	0	0	5	0	12	13	10	0	0	0	1
21600	3	15.99	759.29	1	1	0	34	18	26.3345	0	741.818	865.455	24	0	0	31100	64.1	0	0	0	12	0	12	17	10	0	0	0	0
24545.5	3	16.841	1044.52	1	2	0	876	38	26.4818	0	730.909	791.818	14	0	0	24809.1	62.3	1	0	0	6	0	17	10	7	0	0	0	1
5454.55	3	11.825	195.73	1	2	5	99	8	20.51	0	613.636	767.045	7	2	2	4713	20.3538	0	0	6	4	0	4	8	5	3	1153	230.6	0
9225	3	11.44	303.95	2	2	4	449	43	9.87273	0	660	770	6	1	1	2056.92	51.8769	0	0	4	3	0	19	9	4	3	3810	0	0
12354.5	3	17.77	408.13	1	2	0	194	38	27.2364	0	600	750	8	0	0	6702.77	36.8308	1	0	70	5	0	4	22	13	3	276	82.8	0
41363.6	3	18.997	1252.56	0	2	0	182	8	7.48182	0	774.545	968.182	11	0	0	17459.1	61.8462	1	0	32374	5.69049	0.00142201	8.4678	14.659	8.09808	3	7410	1482	0
18490.9	3	10.16	548.21	0	2	0	131	6	15.6927	0	654.545	763.636	11	0	0	39156.9	65.1692	0	0	0	5	0	2	21	17	2	1153	230.6	0
7356.82	3	17.171	217.66	2	2	0	520	24	24.8236	0	730.909	913.636	8	0	0	12676.6	75.4154	1	0	0	7	0	16	12	4	3	2078	623.4	0
4090.91	3	8.496	144.03	1	0	0	222	12	10.7264	1	560.455	607.159	12	0	0	11042.3	26.7	1	0	0	4	0	9	8	7	1	795	159	0
10636.4	3	8.49	284.07	1	2	0	41	25	27.36	0	601.364	751.705	12	0	0	12640	19.3846	1	0	1172	5.69049	0.00142201	8.4678	14.659	8.09808	3	861	0	0
5454.55	3	22.2	191.47	1	0	12	277	8	17.8527	0	636.364	795.455	16	0	0	3717	16	1	0	1365	4	0	8	17	8	3	58	5.8	0
25438.6	3	19.327	773.55	1	2	0	255	9	7.40909	1	670	725.833	9	0	0	14931.9	50.8308	1	0	0	8	0	3	10	7	2	8272	827.2	0
17181.8	5	10.99	456.49	2	0	4	197	4	18.51	0	758.182	947.727	19	0	0	49889	83	0	0	4	13	0	5	22	11	0	0	0	1
2454.55	3	12.12	99.82	2	1	4	681	10	13.0091	0	741.818	803.636	6	0	0	17352.5	94.3385	1	0	4	4	0	1	8	6	0	0	0	1
5613.64	3	19.53	180.67	0	2	5	98	19	25.42	0	720	900	7	3	2	3004.62	62.6	1	0	6	4	0	7	10	4	0	0	0	1
25000	3	7.26	774.91	0	1	4	11	5	15.6873	0	560.455	653.864	9	0	0	21230.8	78.1846	0	0	4	6	0	1	10	8	0	5731	1719.3	0
10909.1	3	10.251	329.24	1	1	2	277	8	11.2	0	752.727	815.455	6	0	0	3834.92	39.1154	0	0	5	3	0	4	7	2	0	0	0	1
9000	3	13.67	374.2	0	0	0	261	8	22.09	0	675	843.75	13	1	1	21721.5	65.8154	0	0	0	9	0	5	13	5	0	3514	351.4	0
30522.7	5	26.95	975.66	0	2	0	98	19	14.6091	0	618.182	669.697	7	1	0	8024.31	80.2154	1	0	0	2	0	13	3	2	3	2408	481.6	0
4090.91	3	7.89	156.43	0	1	3	237	32	10.1891	0	796.364	995.455	7	0	0	462	3	0	0	3	1	0	9	10	7	3	1175	117.5	0
31818.2	5	10.791	778.38	0	2	4	107	30	6.85091	0	642.273	802.841	22	0	0	22076	21.5769	0	0	4	10	0	4	31	16	1	14677	1467.7	0
14545.5	3	14.65	551.91	1	0	0	235	8	12.3218	1	675	787.5	9	0	0	13247.1	29.2923	1	0	0	2	1	6	14	8	0	0	0	1
18938.6	3	27.489	637.07	1	2	0	8	6	26.43	0	544.091	680.114	9	1	0	8765.77	80.8	1	0	0	5	0	11	9	6	0	0	0	1
5454.55	3	13.11	202.49	0	0	2	710	45	31.6255	0	556.364	649.091	8	0	0	33642.5	85.5692	0	0	48658	5	0	4	15	8	0	0	0	1
27272.7	3	13.959	1006.35	1	2	0	459	8	20.3564	0	609.091	761.364	14	0	0	28765	73.7308	0	0	0	8	0	9	12	7	2	10027	2005.4	0
15709.1	3	8.39	453.84	1	1	0	99	8	11.52	0	675	787.5	10	1	1	12266.5	73.8462	0	0	0	5	0	7	9	2	3	6234	0	0
11906.8	3	13.332	335.22	2	2	4	284	13	31.9527	0	690	862.5	11	0	0	22050.5	75.6	1	0	2455	10	0	0	19	13	3	508	50.8	0
5454.55	3	10.503	198.35	0	2	2	56	8	9.2	0	618.182	669.697	11	0	0	5123.08	36.1154	0	0	5	6	0	6	12	8	3	1029	308.7	0
1590.91	3	12.837	57.85	2	2	0	320	13	3.65727	0	675	787.5	9	1	1	2036.54	13.5	1	0	0	3	0	2	14	8	0	852	170.4	0
20454.5	5	20.075	638.25	0	0	0	19	14	26.4818	2	730.909	852.727	7	0	0	3243.69	86.1	0	0	0	1	0	12	10	1	4	11955	2391	0
15454.5	5	11.691	386.72	0	0	5	438	9	30.0764	0	769.091	833.182	30	0	0	44408.3	37.6615	0	0	6	20	0	14	42	18	4	747	224.1	0
27000	3	10.49	1072.43	0	1	0	4	3	16.68	0	780	845	15	0	0	17170.5	25.5231	1	0	0	5	0	4	17	8	1	5966	0	0
12272.7	3	13.189	498.15	0	0	0	129	30	14.19	2	720	780	7	0	0	7582	60.2	0	0	0	4	0	6	16	7	0	0	0	1
33090.9	5	7.89	566.27	0	2	0	324	10	10.4891	0	705	881.25	32	0	0	11498	38.5846	0	0	0	3	0	59	28	14	1	9201	2760.3	0
7000	3	8.703	224.79	1	0	4	109	21	12.23	0	705	881.25	8	1	1	3648.92	44.3077	1	0	4	4	0	1	18	17	0	1403	420.9	0
35000	5	26.213	1003.43	1	2	4	321	1	18.8591	1	618.182	772.727	12	0	0	24572.2	55.5	1	0	4	6	0	7	32	14	0	0	0	1
24545.5	5	9.675	648.54	0	2	0	152	14	28.42	0	654.545	709.091	14	0	0	45571.1	54	0	0	0	5	0	13	29	18	5	5944	1188.8	0
12272.7	3	7.11	422.42	0	0	0	342	21	24.38	0	548.182	685.227	9	0	0	13662	59.7692	1	0	0	6	0	4	10	5	3	4526	452.6	0
38181.8	3	12.69	1174.07	0	2	0	72	10	25.76	6	560.455	607.159	11	0	0	44048.3	88.6154	0	0	0	5	0	12	11	7	3	2006	401.2	0
12272.7	3	13.739	501.74	1	1	0	204	24	14.5855	0	685	856.25	8	0	0	10283.1	36.6154	0	0	0	5	0.00142201	3	11	9	0	1655	0	0
16000	3	26.389	627.65	1	2	0	140	8	29.3909	1	660	770	9	0	0	9578.77	76.5692	1	0	0	6	0	6	8	3	0	5483	0	0
28636.4	3	11.99	1162.34	1	1	0	54	28	13.9636	0	812.727	880.455	10	0	0	23368.2	50.4	0	0	26302	6	0	7	10	9	0	0	0	1
15454.5	3	11.67	561.97	2	1	3	13	10	8.13818	0	685	799.167	13	0	0	15982.6	95.7385	0	0	3	3	0	9	4	3	0	7412	2223.6	0
18327.3	5	11.466	380.02	1	0	4	53	19	10.5873	0	568.636	710.795	11	0	0	18572.3	41.5385	0	0	4	3	0	8	14	6	0	1395	139.5	0
18000	3	9.135	582.08	1	0	4	484	21	9.85	0	572.727	668.182	5	0	0	15373.8	40.3385	1	0	4	3	0	0	6	4	3	4432	443.2	0
10909.1	3	12.29	333.53	1	0	0	660	23	16.1782	0	654.545	709.091	7	0	0	5068	43.3846	1	0	0	3	0	13	8	0	1	3210	321	0
10909.1	3	15.49	418.87	1	2	1	109	21	18.5155	0	540	585	9	0	0	6095.38	45.7846	0	0	1	7	0	6	11	3	3	521	52.1	0
11818.2	5	19.062	271.55	2	1	0	235	8	16.0118	3	593.182	692.045	10	0	0	1069.62	7.38462	0	0	0	3	0	5	38	20	0	0	0	0
14181.8	3	6.651	372.67	0	0	4	19	14	9.61364	0	645.455	753.03	26	0	0	17837.5	15.0769	0	0	4	10	0	18	32	18	0	0	0	0
7636.36	3	11.39	230.47	0	1	2	689	2	13.6909	0	675	731.25	15	0	0	12120.9	32.0308	0	0	5	5	0	4	27	11	0	0	0	0
22727.3	3	18.205	885.73	1	0	0	92	18	27.24	0	660	770	16	0	0	21309.2	78.3	1	0	0	6	0	17	20	12	0	0	0	0
19636.4	3	9.889	763.09	0	2	2	171	8	9.20455	0	763.636	954.545	13	0	0	10054.2	30.4615	1	0	5	10	0.00142201	8	15	8	0	0	0	1
16363.6	3	9.064	566.05	0	1	0	587	42	12.2636	0	568.636	616.023	7	0	0	15302.3	60.6	1	0	0	2	0	18	10	1	0	0	0	0
9090.91	3	9.79	317.54	1	1	0	324	10	7.74545	0	720	900	7	0	0	5713.85	45.6	1	0	2389	5.69049	0.00142201	8.4678	14.659	8.09808	0	0	0	0
27272.7	5	8.253	521.03	0	2	4	56	8	14.8582	0	572.727	668.182	6	0	0	30545.5	63.9692	0	0	4	3	0	5	8	7	0	0	0	0
10909.1	3	9.441	389.98	0	0	0	214	41	19.9727	0	564.545	658.636	12	0	0	19186	56.6	1	0	0	5	0	5	20	6	0	0	0	0
7545.45	3	13.519	276.83	0	1	0	171	8	16.7482	0	552.273	644.318	14	0	0	27796.6	78.5077	0	0	0	7	0	21	19	11	0	0	0	0
19636.4	3	9.79	571.56	0	0	4	387	19	12.1	0	609.545	711.136	7	0	0	21625.4	64.9615	0	0	454	2	0	9	13	7	0	0	0	0
25000	3	15.291	891.2	0	0	0	185	3	13.39	0	685	742.083	6	0	0	13934.8	87.8	1	0	0	5	0	3	10	7	0	0	0	0
23400	3	11.47	652.65	0	1	0	19	14	17.4764	0	725.455	785.909	11	0	0	15355	80.4923	0	0	0	4	0	17	14	10	0	0	0	0
6363.64	3	6.615	217.27	0	2	0	45	21	32.3	0	677.273	790.152	25	0	0	9069.85	13.1385	1	0	0	9	0	12	18	12	0	0	0	0
16545.5	3	12.582	478.36	1	1	9	469	27	35.5418	1	675	731.25	13	0	0	31011.1	92.6154	1	0	10	8	0	9	19	3	0	0	0	1
1090.91	3	10.341	32.98	1	2	5	439	0	11.4545	0	730.909	852.727	4	1	0	1911.69	65.9077	1	0	6	1	0	8	3	1	0	0	0	0
3636.36	3	13.67	136.08	1	0	8	253	21	12.7273	0	720	900	9	0	0	6481.15	87.8	1	0	20046	5.69049	0.00142201	8.4678	14.659	8.09808	0	0	0	1
13090.9	3	10.41	389.53	1	1	4	215	8	24.5636	0	645.455	699.242	19	0	0	12964.6	27.9	0	0	4	7	0	13	27	10	0	0	0	0
21818.2	5	20.075	510.6	0	1	0	138	0	31.1545	2	600	750	13	0	0	18680.8	43.4769	0	0	0	6	0	6	13	4	0	0	0	1
18000	3	15.499	615.99	0	2	0	274	8	10.0182	0	685	856.25	6	0	0	7955	96.1154	1	0	3675	5	0	1	10	10	0	0	0	0
4000	3	11.997	135.42	0	0	2	441	9	30.31	0	580.909	726.136	23	0	0	39566.2	69.5	0	0	5	20	0	21	40	20	0	0	0	0
4909.09	3	16.841	208.91	1	2	4	196	14	12.32	0	613.636	715.909	6	0	0	7399.62	54.8077	1	0	22424	5.69049	0.00142201	8.4678	14.659	8.09808	0	0	0	0
17727.3	3	13.189	498.15	1	1	0	351	3	15.9055	1	752.727	815.455	10	0	0	20347.4	74.8846	1	0	0	4	0	5	23	10	0	0	0	0
2540.91	3	17.091	78.8	0	2	0	275	8	31.3636	1	645.455	699.242	14	0	0	10490.8	38.0154	1	0	0	7	0	11	11	8	0	0	0	0
3000	3	15.763	103.02	1	0	0	29	19	29.83	0	552.273	690.341	10	1	1	5012	50.8615	1	0	259	8	0	3	10	6	0	0	0	0
22909.1	5	15.026	581.93	1	2	0	495	14	26.9345	2	618.182	772.727	11	0	0	11368	49.2923	0	0	0	4	0	8	11	4	0	0	0	1
26727.3	3	9.79	933.55	1	1	0	275	8	19.8982	0	780	845	10	0	0	8340	69.4615	1	0	0	3	0	30	20	12	0	0	0	0
2954.55	3	10.087	79.7	0	1	0	145	8	29.35	0	690	805	17	0	0	29826	71	1	0	0	9	0	5	16	8	0	0	0	0
13636.4	5	20.064	382.87	0	2	0	33	22	12.5591	0	609.091	710.606	20	1	1	19055.8	44.4	0	0	0	6	0	8	23	6	0	0	0	1
28363.6	3	10.736	771.72	1	1	0	134	8	12.8091	0	752.727	815.455	8	0	0	41795.8	76.3846	0	0	0	4	0	3	8	5	0	0	0	0
8863.64	3	8.18	235.65	1	2	4	277	8	21.8182	0	627.273	731.818	10	0	0	6304.62	54.8308	0	0	4	2	0	8	6	4	0	0	0	0
8590.91	3	12.582	322.89	1	0	4	275	8	25.1	0	725.455	906.818	16	0	0	7666.15	39.7385	0	0	4	10	0	5	29	15	0	0	0	0
9454.55	3	6.741	248.82	2	0	7	31	2	13.5273	0	820	888.333	8	0	0	4076.54	6.6	1	0	8	3	0	1	9	6	0	0	0	0
6000	3	8.679	187.72	1	1	0	253	21	12.4364	0	622.727	674.621	10	0	0	10120.9	36.9385	0	0	0	4	0	20	12	8	3	325	97.5	0
6545.45	3	14.3	274.59	0	2	0	505	10	22.3	0	675	843.75	9	0	0	7164.23	39.3077	1	0	22303	4	0	7	10	4	0	0	0	1
13438.6	5	25.83	490.13	0	1	0	170	23	25.5182	0	670	837.5	10	0	0	7616.31	91.7	1	0	28	5	0	12	18	16	0	0	0	1
28000	3	16.489	970.5	1	2	4	204	24	37.4618	0	710	828.333	18	0	0	43440.9	93.0462	1	0	4	11	0	7	27	15	2	1032	309.6	0
11345.5	3	8.253	306.04	0	1	0	2	2	11.8473	0	609.091	659.848	18	1	1	11759.1	66.2308	1	0	0	11	0	9	24	12	1	2296	459.2	0
8509.09	3	14.049	272.73	0	1	0	680	16	15.6655	0	548.182	639.545	8	1	1	4057.85	48.3538	1	0	0	5	0	21	19	8	3	3491	0	0
6363.64	3	14.663	236.98	0	1	0	314	0	36.2182	0	604.545	705.303	15	0	0	14865.8	55.2	1	0	0	12	0	10	12	7	1	901	270.3	0
10909.1	5	15.99	243.13	1	2	0	808	4	15.8182	0	690	747.5	5	0	0	9437.54	88.0923	0	0	0	2	0	15	5	2	0	2900	290	0
16404.5	3	10.175	639.93	0	2	0	597	11	25.8327	0	785.455	916.364	13	0	0	32893	73.3846	1	0	1188	5	0	10	24	17	0	2310	231	0
13636.4	3	8.18	471.3	1	0	0	115	8	7.48636	0	769.091	961.364	11	0	0	14606	31.5538	1	0	0	4	0	3	9	5	2	1609	482.7	0
10909.1	3	6.201	308.27	1	1	4	102	26	18.0082	1	752.727	878.182	15	0	0	8646.62	27.1	0	0	4	5	0	8	16	9	1	1434	143.4	0
3636.36	3	14.289	134.76	0	1	5	751	16	2.28	0	640.909	747.727	9	0	0	13944	56.8	1	0	6	9	0	0	10	5	0	0	0	1
23636.4	3	12.99	673.79	2	0	5	342	21	10.0455	1	665	831.25	13	1	1	7065	69.6923	0	0	6	9	0	1	14	5	3	6820	682	0
6000	3	10.296	181.22	0	0	4	95	13	12.0655	0	680	850	8	1	1	3328.77	17.5385	1	0	4	3	0	13	18	11	1	512	51.2	0
9409.09	3	10.791	381.91	1	0	0	134	8	14.8473	0	741.818	865.455	7	0	0	4890	16.6154	0	0	0	2	0	13	12	5	2	4524	1357.2	0
9000	3	11.39	296.32	0	0	0	134	8	18.55	2	627.273	784.091	16	0	0	13550	37.0462	0	0	0	7	0	4	19	12	3	2584	0	0
5643.18	3	14.049	166.96	0	2	1	260	21	29.3564	0	720	840	10	0	0	5259.69	51.8	0	0	1	4	0	8	13	9	0	126	25.2	0
8481.82	3	15.813	279.42	1	0	6	92	18	15.6636	0	747.273	809.545	16	1	1	1952.31	40.9231	1	0	7	5	0.00142201	14	12	4	3	3751	375.1	0
21272.7	5	15.58	433.72	2	1	0	240	21	17.6073	0	576.818	672.955	13	0	0	111857	50.0308	1	0	13963	5.69049	0.00142201	8.4678	14.659	8.09808	0	0	0	1
5000	3	15.037	170.09	1	1	0	99	8	3.14182	0	572.727	668.182	10	0	0	1001.54	18.6	0	0	0	1	0	7	3	2	1	1687	506.1	0
14850	5	19.19	386.78	1	1	0	709	27	18.6182	0	544.091	680.114	7	1	1	3691.15	33.9692	0	0	0	2	0	20	11	4	0	0	0	1
20000	3	10.791	664.2	1	0	4	193	13	18.12	1	540	675	8	0	0	5783	97.3538	0	0	4	7	0	1	13	7	0	0	0	1
6136.36	3	13.11	253.11	1	2	5	31	2	4.35273	0	613.636	664.773	9	0	0	23246.5	51.4769	0	0	43007	5	0	4	10	7	3	649	194.7	0
5909.09	3	8.01	158.77	1	0	4	19	14	12.24	0	576.818	624.886	11	0	0	6265.38	27.9692	1	0	239	4	0	6	8	3	3	963	192.6	0
13409.1	3	15.291	525.81	0	2	4	432	10	25.3855	0	572.727	620.455	14	0	0	3763.38	87.1154	1	0	4	3	0	23	7	4	3	3790	1137	0
23636.4	3	16.49	707.99	0	2	0	97	12	21.0764	3	736.364	859.091	31	1	0	12696	22.7077	1	0	0	13	0	4	35	12	0	0	0	1
10227.3	5	16.489	297.31	0	1	0	358	21	12.32	0	618.182	721.212	11	0	0	11766.5	88.6154	0	0	0	7	0	8	12	6	0	0	0	1
18386.4	5	14.661	494.96	2	2	4	517	14	27.84	0	705	881.25	10	0	0	22133.5	48.5538	1	0	21461	6	0	10	16	9	0	0	0	1
27838.6	5	12.62	767.58	2	0	0	305	15	16.1182	0	735	857.5	11	0	0	20171.5	51.7	0	0	0	3	0	11	8	7	0	0	0	1
6618.18	3	16.965	204.85	0	0	3	253	21	20.69	1	763.636	890.909	14	0	0	7929.23	45.6	1	0	1207	6	0	9	25	14	3	730	146	0
24000	5	8.091	498.09	0	1	0	390	13	7.07	1	705	822.5	15	0	0	19167	36.2	0	0	0	9	0	9	24	9	5	3701	0	0
20000	3	6.72	614.99	0	2	0	89	3	22.1455	0	609.545	711.136	20	0	0	31504.6	26.3077	0	0	0	11	0	2	26	15	3	3830	0	0
15272.7	3	10.087	446.31	1	0	4	489	30	5.5	0	725.455	906.818	5	0	0	7241.54	72.6923	0	0	4	4	0	4	10	10	2	4375	875	0
12000	3	8.382	373.94	0	2	4	2	2	14.9273	1	580.909	726.136	16	0	0	11309.5	38.6615	0	0	26	5	0	7	17	10	3	2903	870.9	0
3200	3	14.49	110.14	1	0	5	855	40	23.49	0	720	780	10	0	0	6705	89.7231	1	0	6	5	0	8	9	4	1	1043	312.9	0
909.091	3	15.05	34.69	0	0	5	405	2	20.7164	0	704.545	821.97	12	0	0	7648.85	20.1231	0	0	6	4	0	8	7	3	2	482	144.6	0
18204.5	5	16.29	544.52	1	2	4	111	8	26.7273	0	631.818	684.47	8	1	1	19496.6	83.5385	1	0	25207	6	0	4	11	8	1	6435	643.5	0
10472.7	3	7.62	398.87	1	1	4	9	7	23.64	1	659.091	768.939	10	0	0	18886.2	29.9385	0	0	4	6	0	2	13	8	3	5489	548.9	0
33600	5	18.99	798.8	0	2	0	19	14	27.0218	0	585	682.5	11	0	0	13846.2	37.5	0	0	0	5	0	14	7	3	1	13074	2614.8	0
31818.2	3	16.425	1269.73	2	2	5	389	8	5.1	0	752.727	940.909	15	1	1	17417.5	67.1	1	0	6	8	0	6	15	9	2	274	27.4	0
4909.09	3	12.837	198.35	1	0	0	108	21	25.08	0	812.727	880.455	20	0	0	7008	10.9846	1	0	0	9	0	2	37	21	3	2214	664.2	0
28000	3	18.689	998.14	0	0	0	477	7	17.25	1	670	725.833	6	0	0	13789	113.654	0	0	0	2	0	5	4	4	0	11174	1117.4	0
14181.8	3	15.037	408.22	1	0	0	194	38	19.04	1	675	787.5	10	0	0	10211	52.8769	1	0	299	6	0	3	12	5	2	4127	1238.1	0
10472.7	3	8.18	301.63	0	1	0	232	13	29.2545	0	745	807.083	10	0	0	10109.1	61.1538	1	0	0	4	0	23	15	9	3	917	91.7	0
10000	3	13.189	332.1	1	0	0	480	8	9.8	1	613.636	664.773	22	0	0	3851.54	36.2769	0	0	0	5	0	35	5	2	1	1323	264.6	0
11781.8	3	13.189	478.22	0	0	4	19	14	13.2436	0	544.091	680.114	14	0	0	41348.1	68.4	1	0	4	11	0	2	15	9	3	4157	415.7	0
41363.6	5	20.99	946.68	0	2	0	474	14	26.77	1	665	831.25	18	0	0	46893.5	91.5	0	0	0	11	0	27	15	11	0	0	0	1
4909.09	3	15.61	209.79	0	2	7	32	21	24.2509	0	600	700	9	1	1	6897.69	55.3846	0	0	8	7	0.00142201	5	26	14	3	583	58.3	0
8727.27	3	11.99	265.68	1	1	0	190	17	20.3091	0	568.636	710.795	16	0	0	6671.08	22.3	0	0	0	9	0	9	21	7	2	2923	876.9	0
6145.45	3	15.22	180.83	1	2	3	230	2	11.8064	0	600	750	6	3	3	4161.23	52.4308	1	0	3	4	0	5	9	5	2	1469	440.7	0
7090.91	3	9.891	196.41	0	2	0	189	9	17.9091	1	725.455	906.818	11	1	0	5538.46	67.6	0	0	0	5	0	25	8	5	3	1560	0	0
21302.3	3	27.711	773.01	0	0	0	145	8	18.81	1	725.455	906.818	17	1	1	11271.1	53.6538	0	0	0	4	0	31	12	4	3	7693	0	0
11200	3	14.616	395.09	1	2	5	196	14	28.7182	1	660	715	15	0	0	12515	52.4462	1	0	6	9	0	9	19	12	0	0	0	1
18909.1	3	18.25	580.45	0	1	4	116	14	8.90182	0	564.545	658.636	10	0	0	21067	94.8769	1	0	106	7	0	5	10	3	2	1368	410.4	0
26000	3	10.989	709.78	0	1	0	310	24	33.9055	0	763.636	827.273	20	0	0	22345.4	38.3	0	0	0	8	0	17	38	15	1	7923	792.3	0
3054.55	3	6.858	87.26	1	2	8	479	8	21.3491	0	681.818	795.455	4	0	0	2871.69	30.5	1	0	28341	1	0	1	15	10	1	1187	237.4	0
4581.82	3	14.46	144.49	0	1	4	5	4	11.3127	1	752.727	878.182	7	0	0	3583.85	51.9231	0	0	2	3	0	3	4	1	1	438	0	0
5825	3	21.989	216.45	0	1	0	588	4	18.0736	0	763.636	827.273	5	0	0	3385.85	60.7385	1	0	0	3	0	2	4	2	0	0	0	1
1963.64	3	12.69	60.39	1	1	8	104	23	2.47091	0	663.636	829.545	5	0	0	5178.46	6	1	0	9	3	0	0	5	5	0	0	0	1
5909.09	3	19.341	189.64	1	2	2	67	19	27.4	1	604.545	705.303	10	2	0	13763.1	64.8	1	0	5	3	0	8	16	10	3	1656	0	0
13090.9	5	17.57	362.31	1	1	0	410	8	20.98	0	665	720.417	9	0	0	9497.38	70.1538	1	0	0	5	0	3	10	4	0	0	0	1
5022.73	3	12.231	144.42	0	0	0	48	10	9.02182	0	796.364	929.091	10	0	0	17642.2	32.3077	0	0	0	5	0	5	9	5	0	1398	0	0
31818.2	3	22.74	1350.11	0	2	7	474	14	22.16	0	665	831.25	17	0	0	27679	69	1	0	8	10	0.00142201	19	19	11	0	0	0	1
28636.4	5	23.298	950.42	0	1	0	116	14	24.9927	0	636.364	795.455	6	0	0	38337	69.7846	0	0	0	4	0	11	10	4	0	0	0	1
9763.64	3	21.087	348.47	1	1	0	191	5	25.9	0	730.909	913.636	7	0	0	4601.54	41.5	1	0	0	4	0	4	7	2	1	1583	0	0
13177.3	3	9.99	359.73	0	0	0	542	14	13.2909	0	695	810.833	10	0	0	15776.9	46.2692	0	0	0	8	0	11	18	4	2	5129	1025.8	0
38586.4	3	16.695	1189.41	0	1	0	79	2	11.2364	0	741.818	927.273	7	0	0	8532.92	61.6154	1	0	0	3	0	4	9	4	1	7355	735.5	0
6545.45	3	9.99	232.29	1	2	0	0	0	9.77	0	665	720.417	16	1	1	6787	38.7692	1	0	0	5	0	8	34	22	0	0	0	1
10909.1	5	17.589	243.13	1	2	4	253	21	27.8945	0	695	810.833	4	0	0	3260.92	94.3846	0	0	4	2	0	6	8	4	4	2107	632.1	0
5890.91	3	11.691	242.57	1	1	4	109	21	10.91	0	700	758.333	9	0	0	6752.31	70.9615	0	0	4	3	0	6	6	4	3	1827	365.4	0
18181.8	3	6.408	618.64	1	1	0	410	8	28.0964	0	589.091	736.364	14	0	0	11747.1	36	0	0	0	4	0	14	17	11	2	1520	304	0
27272.7	3	10.725	964.5	0	2	0	78	19	34.1236	0	618.182	772.727	24	0	0	50903.1	75.3846	0	0	0	17	0.00142201	18	23	10	2	10640	0	0
9218.18	3	17.919	275.35	1	1	0	54	28	21.71	0	741.818	865.455	8	0	0	26115	112.038	1	0	4142	5.69049	0.00142201	8.4678	14.659	8.09808	3	3478	695.6	0
37818.2	3	9.17	1020.13	1	2	0	185	3	14.69	0	640.909	801.136	5	0	0	30915	77.9692	1	0	0	3	0	4	9	7	3	12079	3623.7	0
5454.55	3	12.015	169.32	0	0	0	33	22	18.7182	2	675	787.5	14	0	0	6602.31	36.7231	0	0	0	4	0	7	15	7	0	1672	334.4	0
3000	3	12.79	110.86	0	1	0	143	8	10.53	1	556.364	602.727	9	0	0	40458.5	115.731	0	0	0	3	0	10	9	9	3	873	174.6	0
12272.7	5	13.255	334.05	1	0	4	588	4	21.1527	0	601.364	751.705	15	0	0	11970	20.8615	0	0	4	10	0	11	17	7	0	4559	455.9	0
32727.3	3	10.845	997.15	1	1	0	167	8	16.5364	1	640.909	747.727	18	0	0	10030	14.4923	0	0	0	10	0	8	14	10	0	0	0	1
5909.09	3	16.841	174.09	1	1	7	8	6	14.0727	0	670	725.833	4	0	0	5183.08	108	0	0	8	3	0	1	7	5	0	0	0	1
14181.8	5	12.897	281.28	1	2	0	64	14	12.49	0	622.727	726.515	10	0	0	13471	75.6	0	0	28	6	0	2	14	10	0	0	0	1
1818.18	3	12.683	65.99	0	0	0	592	23	5.20364	0	741.818	865.455	5	1	1	3033.46	31.6154	0	0	0	4	0	1	5	4	3	684	136.8	0
8181.82	3	12.639	329.72	0	1	0	512	21	14.4818	0	758.182	821.364	10	2	0	9356.31	30.6	0	0	0	3	0	3	9	7	3	2201	0	0
16363.6	5	13.06	410.11	2	1	0	292	17	11.9864	1	613.636	767.045	5	0	0	10366.2	46.5231	0	0	0	2	0	4	4	2	3	5164	1549.2	0
3927.27	3	4.878	108.58	0	1	3	209	21	17.81	0	867.273	939.545	14	0	0	13548	25.1538	1	0	9533	5.69049	0.00142201	8.4678	14.659	8.09808	3	472	141.6	0
5454.55	3	13.189	166.05	0	1	5	213	3	11.0509	1	715	893.75	14	0	0	18225.2	37.7	0	0	6	8	0	6	23	15	3	1483	148.3	0
24250	5	17.09	664.24	2	0	3	204	24	21.9182	0	622.727	778.409	20	0	0	16247.5	41.3	0	0	3	5	0	24	8	6	4	13013	2602.6	0
24000	3	12.089	785.62	0	2	0	371	7	20.8636	0	544.091	634.773	12	0	0	25982.9	68.7	1	0	0	6	0	4	9	6	0	0	0	1
28636.4	3	10.377	1154.66	0	2	2	386	19	19.9527	1	640.909	694.318	12	0	0	28815	46.3846	0	0	5	7	0	11	16	7	0	6830	1366	0
17454.5	3	12.29	533.65	0	0	0	349	44	24.3	0	654.545	818.182	12	1	1	12700.6	45.3231	0	0	0	6	0	7	13	3	2	7022	1404.4	0
23772.7	3	13.519	872.19	0	2	0	121	14	14.8827	0	650	704.167	20	0	0	32445.2	50.1923	1	0	0	8	0	8	18	8	0	8370	0	0
10909.1	5	13.185	283.28	0	2	0	184	26	20.9364	0	631.818	684.47	10	0	0	9753.46	97.5	0	0	0	4	0	7	10	5	0	0	0	1
13000	3	12.089	425.55	1	0	0	275	8	20.2009	0	556.364	649.091	9	0	0	11131	63.7846	1	0	24935	5	0	6	12	7	0	0	0	0
13561.4	5	11.691	377.05	0	0	0	552	0	16.4782	0	710	828.333	8	0	0	17876	82.5231	1	0	0	3	0	3	18	13	0	0	0	1
9454.55	3	15.389	273.39	1	1	0	72	10	20.6273	0	604.545	654.924	14	0	0	7381	51.5769	0	0	0	10	0	9	11	7	0	0	0	0
14181.8	3	5.32	391.5	2	0	4	79	2	9.09818	1	796.364	862.727	15	0	0	10855.4	16.3846	0	0	4	9	0	3	18	10	0	0	0	0
13090.9	3	9.75	385.8	1	1	0	3	0	32.8255	0	544.091	634.773	12	0	0	13300	69.2462	0	0	0	7	0	13	35	21	0	0	0	0
9454.55	3	14.31	274.63	0	2	4	324	10	20.88	0	600	700	30	0	0	22602	75.5769	1	0	4	12	0	18	28	7	0	0	0	1
4545.45	3	8.701	156.48	1	1	7	51	13	18.96	0	681.818	738.636	8	0	0	28148.3	116.077	0	0	8	2	0	12	7	6	0	0	0	0
17290.9	5	23.99	455.89	0	1	0	619	11	15.2836	0	680	793.333	6	0	0	18096.9	91.7538	1	0	2	5	0	1	14	8	0	0	0	1
24054.5	3	19.327	1056.55	1	1	0	406	8	21.4727	0	725.455	906.818	9	0	0	42760.3	90.5769	1	0	0	8	0	5	19	9	0	0	0	0
8181.82	3	20.39	373.63	2	2	0	131	6	7.92818	0	556.364	695.455	6	0	0	624.615	14.4923	1	0	0	2	0	5	2	0	0	0	0	0
2000	3	13.849	67	0	1	5	265	7	5.62727	0	720	780	5	0	0	33722.8	100.385	0	0	6	3	0	12	13	6	0	0	0	0
13181.8	3	15.33	505.02	1	0	0	31	2	17.4355	0	618.182	721.212	6	0	0	25945	97.9	1	0	16053	5.69049	0.00142201	8.4678	14.659	8.09808	0	0	0	0
5909.09	3	11.792	163.04	0	1	5	19	14	17.7	0	654.545	763.636	13	0	0	8037.08	18.8462	0	0	6	5	0	13	12	3	0	0	0	0
6000	3	14.289	202.14	1	1	5	197	4	13.6145	0	675	787.5	7	0	0	994.154	25	0	0	6	3	0	6	9	3	0	0	0	1
8727.27	3	9.44	256.04	1	1	0	290	18	28.7018	0	580.909	629.318	8	0	0	3777.69	23.8	0	0	0	2	0	15	6	2	0	0	0	0
16000	3	11.691	539.03	0	2	4	296	5	14.2282	0	560.455	607.159	10	0	0	19368.5	97	0	0	4	7	0	7	13	13	0	0	0	0
35000	5	12.62	789.57	0	2	0	648	13	8.04	0	758.182	947.727	12	1	1	20539.4	39.1154	0	0	0	5	0	3	12	9	0	0	0	0
20454.5	5	13.65	577.18	0	1	0	0	0	19.9909	2	758.182	884.545	20	0	0	28250.9	29.0769	1	0	0	7	0	5	38	21	0	0	0	0
4000	3	20.933	146.69	0	0	0	230	2	17.1982	0	589.091	736.364	22	0	0	18327.7	15.7846	0	0	0	7	0	7	23	11	0	0	0	0
30000	3	17.271	1102.57	0	2	0	841	42	28.9882	0	636.364	742.424	12	0	0	16705.2	95.7692	0	0	0	6	0	17	11	9	0	0	0	0
4090.91	3	7.99	156.66	1	1	4	515	47	24.6545	0	740	863.333	22	0	0	6349.54	10.6615	0	0	4	9	0	7	26	12	0	0	0	0
8272.73	3	7.551	220.62	0	1	0	278	24	13.97	0	604.545	654.924	6	1	1	3932.31	63.3231	0	0	0	2	0	5	12	7	0	0	0	0
7000	3	13.35	237.04	1	1	5	52	19	19.82	0	695	868.75	8	0	0	2832	17.5385	0	0	6	5	0	7	7	5	0	0	0	0
12000	3	15.389	410.08	1	0	0	62	13	19.07	0	710	828.333	9	0	0	10792.9	82.8	1	0	0	3	0	11	5	5	0	0	0	0
5909.09	3	10.99	212.78	1	1	4	10	8	6.58182	0	675	787.5	8	0	0	11996	74.8615	0	0	4	5	0	3	9	5	0	0	0	0
7281.82	3	8.775	286.14	1	0	4	162	2	27.2182	0	622.727	778.409	9	0	0	8967.69	55.3846	0	0	4	7	0	4	9	3	0	0	0	0
10000	3	13.779	348.18	1	0	0	90	21	9.11818	0	627.273	679.545	4	0	0	8376	85.4769	1	0	53326	4	0	1	8	8	0	0	0	0
18909.1	3	5.852	481.84	0	0	0	31	2	5.72727	1	601.364	751.705	8	0	0	68692.6	16.2462	0	0	0	4	0	8	7	5	0	0	0	0
17727.3	3	11.47	494.43	2	0	0	160	4	19.6364	1	544.091	680.114	12	1	0	14942	41.1923	0	0	0	7	0	4	17	10	0	0	0	0
30000	3	20.075	1088.34	1	1	0	235	8	23.28	0	747.273	809.545	24	0	0	28053.8	71.8154	1	0	76	10	0	36	17	11	0	0	0	0
10909.1	3	17.589	351.53	0	1	2	512	21	19.08	0	690	747.5	11	0	0	14272.5	62.5692	0	0	5	7	0	6	18	13	0	0	0	1
10909.1	3	14.124	403.42	0	0	2	62	13	8.88182	0	747.273	871.818	8	0	0	2670	38.5385	1	0	18950	5.69049	0.00142201	8.4678	14.659	8.09808	0	0	0	0
4545.45	3	7.416	157.24	1	1	4	495	14	12.0182	0	720	780	4	0	0	2615.85	81	0	0	4	2	0	10	2	0	1	1237	0	0
12000	3	11.48	395.6	1	2	0	143	8	19.8655	0	568.636	710.795	19	0	0	15882.5	36.4615	0	0	0	10	0	5	15	8	1	5069	1013.8	0
10636.4	3	8.789	407.32	1	1	4	143	8	9.59091	0	763.636	954.545	6	0	0	15707.3	40	0	0	4	4	0	1	8	6	3	5967	1193.4	0
9818.18	5	9.576	258.76	1	0	0	142	0	34.6473	0	763.636	954.545	7	0	0	22935.7	90.6462	0	0	0	3	0	10	7	1	0	0	0	1
35454.5	3	15.61	1048.95	1	1	4	248	11	18.8	0	645.455	699.242	16	0	0	68631	56.1923	0	0	4	9	0	1	23	12	2	1982	0	0
7000	3	12.089	229.14	1	1	0	66	14	7.92727	0	700	758.333	9	0	0	2422	31.0154	0	0	0	4	0	16	7	6	3	1147	344.1	0
30000	3	7.35	931.13	0	2	2	499	13	13.5164	0	700	758.333	10	0	0	86359.5	76.2462	0	0	5	6	0	6	15	9	1	8622	862.2	0
7363.64	3	13.99	307.56	0	1	2	579	20	12.8182	0	589.091	687.273	12	0	0	18981	62.1923	0	0	5	6	0	9	28	19	3	959	287.7	0
20000	3	7.551	630.34	0	1	4	493	42	10.2764	2	725.455	785.909	13	0	0	37914.2	63.3	0	0	4	5	0	11	22	15	3	624	0	0
11818.2	3	7.101	312.86	0	0	2	33	22	9.19091	0	670	781.667	11	1	1	7714	31.2308	0	0	5	3	0	16	14	9	3	4488	897.6	0
12159.1	5	21.087	380.36	1	1	0	97	12	27.05	1	552.273	598.295	15	0	0	7966.15	84.2	0	0	0	9	0	6	16	5	0	0	0	1
9090.91	3	7.29	310.1	0	0	12	204	24	10.82	0	609.545	761.932	16	0	0	5149	10.3385	1	0	514	5.69049	0.00142201	8.4678	14.659	8.09808	1	1155	346.5	0
12272.7	3	12.49	501.74	1	1	4	473	8	15.2591	1	665	720.417	9	0	0	10095	82.3	0	0	4	5	0	12	18	7	2	2052	410.4	0
28636.4	3	11.14	1148.18	0	2	0	238	22	15.3573	0	609.545	761.932	14	0	0	20839.4	58.9077	1	0	588	4	0	22	13	7	3	5317	1595.1	0
21818.2	5	16.59	591.19	0	1	4	268	8	22.4182	0	700	816.667	15	0	0	26250	72.3	0	0	4	11	0	7	16	4	0	0	0	1
23636.4	3	7.986	619.93	0	1	0	180	32	16.18	0	677.273	846.591	16	0	0	28533.5	34.4	0	0	0	5	0	4	19	14	0	5096	1019.2	0
3700	3	12.606	121.95	1	0	1	72	10	18.7936	0	695	810.833	7	0	0	47039	103.269	1	0	20007	5.69049	0.00142201	8.4678	14.659	8.09808	0	0	0	1
24545.5	3	13.49	916.13	0	2	0	178	23	21.4909	3	548.182	639.545	12	1	1	12987	57.3231	1	0	0	5	0	11	9	4	0	0	0	1
3150	3	15.939	108.42	1	1	1	143	8	12.1827	0	780	975	12	0	0	9335.77	41.8846	1	0	1	2	0	16	12	6	3	479	143.7	0
31968.2	5	15.05	644.23	0	2	0	737	39	16.5727	0	780	845	3	0	0	3648.62	31.7692	0	0	0	1	0	4	2	2	2	2985	0	0
18909.1	3	10.99	523.75	0	1	2	500	27	10.7545	0	730.909	791.818	7	1	1	10498	26.2	0	0	5	3	0	8	6	5	2	7655	1531	0
15000	5	15.813	377.41	1	1	0	72	10	12.7145	0	700	875	8	0	0	16908.8	42.7	0	0	0	5	0	3	9	7	2	5955	595.5	0
22727.3	5	17.56	628.87	0	1	4	642	45	13.9	1	564.545	611.591	6	0	0	32918.8	79.1538	1	0	13261	5.69049	0.00142201	8.4678	14.659	8.09808	5	6754	675.4	0
12875	5	20.49	344.63	1	2	5	429	8	11.4455	0	725.455	846.364	7	0	0	3270	68.8615	0	0	6	4	0	11	15	8	5	2742	0	0
9090.91	3	11.47	329.62	0	1	0	386	19	29.7927	0	613.636	664.773	15	1	1	39589.8	93	0	0	0	10	0	8	12	10	0	0	0	1
14181.8	5	14.46	282.09	1	1	0	19	14	14.58	0	600	650	6	1	1	4535	36.7231	0	0	0	3	0	3	10	6	0	0	0	1
21818.2	3	12.49	668.98	0	2	0	473	8	17.8773	1	670	837.5	21	0	0	17761.7	67.6615	1	0	0	6	0	27	20	13	3	9338	1867.6	0
1000	3	8.991	32.27	1	2	7	66	14	12.84	0	718.182	837.879	4	0	0	0	0	1	0	8	0	0	1	3	2	3	247	49.4	0
20000	3	17.622	703.34	0	0	4	312	12	26.16	0	660	715	12	0	0	26517.1	107.192	1	0	4	7	0	4	8	7	0	0	0	1
7272.73	3	16.951	278.94	0	2	5	376	43	24.4364	0	560.455	700.568	7	0	0	6518.77	63.3231	1	0	6	4	0	16	5	2	1	134	0	0
8509.09	3	10.377	237.53	1	0	0	19	14	18.92	0	755	943.75	14	0	0	2235	6.78462	1	0	0	4	0	10	14	8	0	1381	276.2	0
27272.7	5	17.27	624.95	0	2	0	153	11	18.3818	1	670	837.5	14	0	0	32111	94.5	1	0	1405	9	0	9	12	5	5	4992	1497.6	0
4363.64	3	13.779	139.27	1	0	0	340	14	11.1364	0	700	875	13	0	0	2680.46	28.2154	1	0	43224	4	0	20	11	5	2	1791	358.2	0
9800	3	12.617	323.03	1	1	0	123	12	18.9818	2	640.909	694.318	7	0	0	6674.77	39.3077	0	0	0	3	0	4	8	4	0	3412	682.4	0
15272.7	5	31.592	530.41	2	2	4	480	8	21.2236	1	730.909	791.818	9	1	1	7119.54	75.7077	0	0	4	2	0	18	10	6	2	4288	1286.4	0
13340.9	5	17.56	369.15	0	2	4	636	27	26.5336	0	670	725.833	11	0	0	20877.7	104.885	0	0	234	7	0	7	15	8	5	4608	460.8	0
29263.6	5	21.879	709.06	0	0	0	178	23	19.7636	1	741.818	803.636	13	0	0	23650.4	108.462	0	0	0	6	0	6	14	11	1	9445	0	0
1063.64	3	13.98	44.42	0	0	2	553	27	16.45	0	552.273	644.318	15	0	0	12590	53.0769	1	0	5	6	0	11	14	4	3	306	91.8	0
36000	5	21.472	865.51	0	2	0	72	10	19.52	0	645.455	699.242	10	0	0	31785	79.7538	0	0	0	4	0	8	12	5	5	3393	1017.9	0
6000	3	11.511	201.56	0	0	5	336	44	23.3591	2	622.727	778.409	9	1	0	14770	74.5	0	0	6	2	0	14	8	7	0	2525	0	0
10000	3	18.601	356.08	1	2	5	76	26	35.8727	0	627.273	784.091	11	0	0	33668	96.1692	0	0	6	8	0	5	12	10	1	474	142.2	0
20843.2	3	23.089	959.65	1	2	4	370	13	17.5364	0	670	725.833	11	0	0	15608.9	57.1846	1	0	57505	5.69049	0.00142201	8.4678	14.659	8.09808	0	0	0	1
10909.1	3	11.539	324.98	0	0	0	566	30	7.13455	0	758.182	884.545	9	0	0	5050	102.231	0	0	0	3	0	8	8	7	1	2104	0	0
18181.8	5	15.1	476.85	2	1	0	514	13	17.25	0	572.727	715.909	11	0	0	30414.5	57.9385	0	0	0	6	0	4	24	14	5	1082	0	0
16000	5	10.989	339.88	0	2	0	125	9	14.98	3	552.273	644.318	15	0	0	7732.62	45.3462	0	0	0	6	0	7	15	6	0	0	0	1
9818.18	5	12.303	277.18	0	1	0	493	42	17.3364	0	576.818	672.955	26	0	0	12441.2	39.2308	0	0	0	11	0	13	24	13	0	0	0	1
13090.9	3	9.889	381.55	1	1	0	82	34	4.76	0	685	856.25	6	0	0	7504	52.1231	0	0	0	3	0	3	17	9	3	2107	421.4	0
7272.73	3	12.639	263.78	2	2	0	116	14	28.61	0	640.909	747.727	17	1	1	22913.7	44.2154	1	0	0	7	0	6	20	7	3	3210	0	0
17727.3	3	8.541	480.43	1	0	0	167	8	8.81182	0	675	731.25	4	0	0	15807	74.8615	0	0	0	4	0	2	12	4	2	2246	0	0
20000	3	7.551	630.34	0	0	0	97	12	16.5818	1	740	863.333	16	0	0	21458.1	37.4769	0	0	0	9	0	2	18	6	3	3379	337.9	0
10909.1	3	13.779	348.18	0	1	2	737	39	3.95182	0	690.909	806.061	19	0	0	3416	7.86154	0	0	5	4	0	27	19	14	3	4495	1348.5	0
8420.45	3	13.67	242.38	0	1	0	512	21	19.4909	1	552.273	690.341	13	0	0	25504	41.5692	0	0	0	5	0	3	11	4	3	1035	207	0
9090.91	3	12.74	335.69	0	1	2	104	23	14.13	0	613.636	767.045	42	1	1	8688.92	11.8154	0	0	5	18	0	11	43	13	1	4390	0	0
19545.5	5	13.99	500.16	0	1	0	290	18	34.5927	0	548.182	593.864	15	0	0	16289	85.0385	1	0	0	8	0	14	9	6	0	1952	0	0
2045.45	3	10.384	80.02	2	0	3	157	8	16.4455	0	815	1018.75	7	0	0	174570	11.5	0	0	3	4	0	0	7	4	0	0	0	1
18181.8	5	16.074	506.35	0	1	0	345	20	28.93	0	675	843.75	13	0	0	20064	91.6	0	0	0	9	0	8	10	3	0	0	0	1
25772.7	5	18.891	852.01	1	2	0	31	2	26.2036	0	640.909	801.136	14	0	0	19120.4	53.0769	0	0	0	4	0	18	9	7	4	12649	0	0
27272.7	3	8.679	782.15	2	1	0	132	12	23.8473	1	556.364	695.455	24	0	0	69097.5	81.4154	0	0	0	14	0	7	23	11	0	6572	657.2	0
28000	3	9.67	899.15	0	2	0	62	13	6.86455	0	663.636	718.939	14	0	0	25433.1	54.2308	1	0	28	8	0	4	19	15	0	5723	0	0
16363.6	3	6.24	549.56	0	1	0	710	45	10.8818	0	715	834.167	14	1	0	20211	53.2	1	0	0	7	0	9	15	6	1	2922	584.4	0
1536.36	3	8.998	40.85	2	0	0	687	23	4.37455	0	585	731.25	11	1	1	6524	15.3231	0	0	0	3	0	1	23	10	0	600	60	0
20000	3	5.32	602.3	0	0	6	139	8	5.3	0	704.545	763.258	16	0	0	8586	11.6308	1	0	7	6	0	4	20	10	3	7035	703.5	0
10909.1	3	7.579	308.27	1	1	4	32	21	23.7636	0	752.727	815.455	12	2	1	18829.6	40.6154	0	0	4	9	0.00142201	6	15	6	3	3415	1024.5	0
16545.5	3	9.891	458.28	1	0	0	22	16	14.22	1	730.909	852.727	23	0	0	12178	66.5538	1	0	0	4	0	20	13	9	2	2344	703.2	0
5850	3	16.425	179.58	1	2	4	140	8	31.6727	0	540	630	12	0	0	7156.15	60.9231	1	0	4	10	0	3	19	9	0	1103	110.3	0
12000	5	14.99	285.42	2	0	0	232	13	14.6618	1	735	857.5	13	1	1	6433.85	38.0769	0	0	0	3	0	11	12	5	0	2914	0	0
6545.45	3	7.39	186.34	1	1	0	204	24	9.61818	0	589.091	638.182	7	0	0	3511.85	76.3538	0	0	0	1	0	13	2	2	3	2916	583.2	0
11000	3	6.318	339.75	0	2	4	67	19	9.63	0	654.545	818.182	8	0	0	10532	39.9538	0	0	4	7	0	2	8	6	0	4082	1224.6	0
2727.27	3	13.67	102.06	1	0	3	230	2	23.81	0	556.364	695.455	6	0	0	8637	85.9385	1	0	57787	5.69049	0.00142201	8.4678	14.659	8.09808	0	0	0	1
25000	3	9.135	808.45	1	1	0	389	8	13.2109	0	769.091	961.364	12	2	0	20225.5	60.2	1	0	0	6	0	8	12	8	3	7453	745.3	0
15000	3	15.026	510.2	1	1	4	405	2	14.8	0	593.182	692.045	12	0	0	20179.4	72.6923	1	0	4	4	0	5	21	11	0	6877	0	0
17018.2	5	15.59	347.06	1	1	4	33	22	7.22	0	725	845.833	5	0	0	3626.77	23.5385	0	0	4	2	0	1	5	4	0	6529	652.9	0
9659.09	3	15.61	371.51	2	1	0	124	13	40.3418	0	552.273	598.295	9	0	0	4564.62	74.7385	0	0	0	5	0	4	8	6	3	1166	116.6	0
1625	3	11.14	53.31	0	0	3	129	30	19.95	2	580.909	677.727	8	0	0	1118.77	48.5	0	0	40436	1	0	10	23	10	1	762	152.4	0
5111.36	3	11.539	140.56	0	0	3	420	4	7.34727	0	552.273	690.341	7	0	0	126.923	2.2	1	0	3	2	0	14	5	0	3	343	102.9	0
41363.6	3	8.18	1099.69	2	2	4	337	14	28.3091	0	785.455	916.364	13	0	0	58886.5	69.6	0	0	4	6	0	9	23	18	0	2326	0	0
16363.6	5	12.29	335.87	2	2	4	521	24	17.3782	0	730.909	852.727	17	0	0	13906.2	43.3	0	0	4	11	0	3	25	15	0	0	0	1
13090.9	3	7.551	378.2	1	2	6	95	13	28.5164	0	650	758.333	5	0	0	2720.31	38.8846	0	0	7	1	0	18	15	6	2	3140	942	0
5909.09	3	14.663	169.27	0	1	9	629	20	17.57	0	725.455	906.818	7	0	0	10752	106.508	0	0	0	3	0	2	8	2	3	2369	236.9	0
4363.64	3	15.31	167.13	0	1	3	621	43	19.0691	0	690	862.5	6	1	0	6269.85	40.9846	1	0	3	3	0	5	9	6	0	137	13.7	0
16363.6	3	11.99	664.2	1	2	0	91	7	21.16	0	705	763.75	7	0	0	26846.6	110.654	0	0	0	3	0	26	12	5	0	6061	1818.3	0
13636.4	5	14.64	354.03	0	0	0	644	26	28.4	0	752.727	878.182	14	0	0	21999.4	75.5769	0	0	0	6	0	9	10	7	2	1089	326.7	0
9000	3	12.639	296.75	0	1	0	32	21	17.73	0	700	816.667	19	0	0	13520.8	18.3692	0	0	0	10	0	4	29	17	3	3067	306.7	0
19636.4	3	10.087	765.1	2	1	0	310	24	23.3	0	747.273	871.818	11	0	0	21266.5	36.5077	0	0	0	4	0	2	17	12	3	10942	0	0
15954.5	5	14.22	326.87	2	2	0	116	14	8.64	0	774.545	839.091	14	1	0	5619.23	40.9231	1	0	0	3	0	30	6	3	1	6096	0	0
6545.45	3	13.332	266.18	1	0	12	347	14	15.3	0	572.727	715.909	9	0	0	8253.46	52.2	1	0	46473	5.69049	0.00142201	8.4678	14.659	8.09808	0	3151	945.3	0
9090.91	3	10.16	323.43	1	1	0	160	4	11.0209	1	560.455	700.568	4	0	0	5370	63.2308	0	0	38521	2	0	6	6	6	3	4551	910.2	0
16363.6	3	8.19	628.49	1	1	4	72	10	21.3055	0	705	881.25	10	0	0	43187.3	39.9692	1	0	4	9	0	0	13	11	3	7531	2259.3	0
11345.5	5	18.766	238.9	1	0	0	112	23	11.91	0	670	725.833	6	0	0	10007.3	56.0308	1	0	11901	5.69049	0.00142201	8.4678	14.659	8.09808	0	0	0	1
13963.6	3	13.189	425.09	1	2	0	245	26	21.23	0	705	763.75	8	0	0	17532.7	97.3538	0	0	0	3	0	7	4	4	3	5268	1580.4	0
10909.1	3	6.048	307.5	2	1	3	354	26	0	0	709.091	768.182	3	0	0	0	0	0	0	3	0	0	3	6	6	3	2722	272.2	0
38181.8	3	11.331	1172.39	0	2	0	797	14	33.5018	2	660	825	24	0	0	43393.8	49.8462	0	0	0	13	0.00142201	26	14	7	2	3970	794	0
1890.91	3	8.892	51.54	1	0	10	155	0	2.51182	0	774.545	903.636	6	0	0	1126.15	70.3846	1	0	15244	5.69049	0.00142201	8.4678	14.659	8.09808	0	0	0	1
9090.91	3	11.53	329.91	1	2	5	260	21	39.4691	0	622.727	726.515	10	0	0	8162.77	64.5	0	0	6	3	0	6	7	5	3	4486	448.6	0
10000	3	11.115	333.82	0	2	4	337	14	3.89455	0	609.091	761.364	8	0	0	8176.62	27.1385	1	0	175	2	0	13	22	16	3	4294	429.4	0
35000	3	16.55	1240.03	1	2	0	9	7	23.7436	0	715	893.75	9	0	0	69121	114.231	0	0	0	5	0.00142201	21	12	9	0	0	0	1
8000	3	10.99	261.88	0	1	5	434	2	10.5	0	736.364	797.727	6	1	1	2136	26.4	0	0	6	3	0	1	13	7	3	538	107.6	0
21818.2	3	12.837	661.14	1	1	4	296	5	12.61	0	705	822.5	8	0	0	13851.4	80.7692	1	0	4	4	0	5	9	5	0	0	0	1
3600	3	14.014	120.85	0	2	5	196	14	26.9909	0	552.273	690.341	9	0	0	18603.7	90.8	0	0	6	5	0	11	9	8	3	557	111.4	0
20372.7	5	24.629	693.25	1	2	0	100	4	21.6873	0	695	868.75	11	0	0	4141.85	33.8077	0	0	0	6	0	21	10	6	0	0	0	1
26363.6	5	26.389	834.11	1	2	0	405	2	16.68	0	556.364	602.727	6	0	0	9306	103.269	0	0	2	1	0	16	6	5	0	0	0	1
10636.4	3	21.989	334.43	1	2	5	141	13	6.97091	0	720	900	5	0	0	3333	31.7692	0	0	6	4	0	1	5	3	0	0	0	1
1600	3	12.001	52.32	1	0	0	36	13	26.5091	0	593.182	741.477	10	0	0	1438	5.1	1	0	0	2	0	5	10	6	3	746	223.8	0
19636.4	3	9.17	573.83	0	2	0	31	2	25.85	1	544.091	589.432	24	0	0	20026.5	51.9	0	0	0	7	1	23	12	7	1	2722	816.6	0
5800	3	15.906	199.53	1	1	5	149	22	9.21818	0	736.364	920.455	11	1	1	13428.2	67.0923	0	0	6	5	0	2	13	7	1	1229	368.7	0
5090.91	3	9.79	177.82	1	1	4	19	14	5.14	0	540	630	7	1	1	6656.46	37.5692	0	0	4	2	0	12	17	13	3	73	0	0
13090.9	5	11.061	358.27	0	1	0	753	0	26.86	0	589.091	736.364	8	0	0	6845.77	91.2923	1	0	0	1	0	16	9	4	1	5555	0	0
4581.82	3	12.529	138.28	0	1	0	275	8	18.7364	0	556.364	649.091	9	0	0	9537.23	71.1846	1	0	0	4	0	4	5	2	2	397	79.4	0
31818.2	5	25.49	1037.38	0	2	0	488	24	27.2782	0	680	850	22	0	0	54761.5	87.9846	0	0	0	13	0	18	36	20	4	5191	0	0
10472.7	3	8.244	306	1	1	3	17	13	4.54909	1	556.364	649.091	18	0	0	149	1.2	1	0	3	2	0	10	7	5	1	968	0	0
30000	3	22	1114.91	0	2	0	656	39	20.3564	0	752.727	940.909	22	0	0	53601.7	67.9385	1	0	0	12	0	10	22	12	2	2075	415	0
26363.6	5	10.989	616.03	0	0	4	191	5	27.4255	0	725	845.833	15	0	0	31796.5	34.0308	0	0	4	5	0	14	17	9	3	9386	0	0
24545.5	5	12.591	697.9	0	1	0	512	21	19.1545	0	725.455	906.818	7	0	0	120304	75	0	0	0	4	0	9	9	6	5	5097	509.7	0
2954.55	3	7.99	78.33	0	0	0	31	2	19.3545	0	807.273	874.545	13	1	1	1990.15	9.46154	0	0	0	4	0	3	15	7	1	164	16.4	0
28068.2	5	13.585	532.52	0	1	2	188	23	25.2727	0	645.455	699.242	11	0	0	54676.2	76.3	1	0	9384	8	0	9	16	5	1	3106	621.2	0
19090.9	3	14.08	718.55	0	0	0	581	24	1.20909	0	774.545	903.636	9	0	0	11937.7	27.6	0	0	0	2	0	2	9	6	3	3266	0	0
10909.1	3	20.735	365.81	2	0	0	23	9	15.1273	0	600	650	10	0	0	14863.7	65.4	1	0	0	8	0	0	22	9	3	913	273.9	0
15200	3	12.74	510.25	0	0	0	123	12	6.70909	0	685	799.167	8	0	0	11706.5	50.1846	0	0	0	5	0	6	9	3	3	3333	999.9	0
35454.5	3	11.462	973.95	0	2	0	54	28	7.97273	0	660	715	15	1	1	32024.5	65.5846	1	0	0	8	0	3	15	8	0	11262	0	0
19636.4	3	13.585	801.17	0	2	0	127	13	14.49	0	690	747.5	10	0	0	34179.2	90.3538	1	0	33143	8	0	8	20	13	2	8331	1666.2	0
7250	3	10.75	236.5	2	0	4	396	7	28.94	0	640.909	801.136	20	0	0	8052.15	19.9231	1	0	4	10	0	4	22	10	3	2649	0	0
8727.27	3	15.22	278.19	0	2	0	757	15	13.51	3	618.182	669.697	8	0	0	10401.9	97.5	1	0	0	3	0	17	9	3	0	758	0	0
22909.1	5	15.389	488.53	0	0	0	249	36	31.8982	0	785.455	916.364	11	0	0	32569.4	47.7	0	0	0	5	0	9	14	7	3	833	0	0
25454.5	3	10.75	913.38	0	0	4	103	36	19.3582	0	636.364	689.394	9	0	0	36795.2	78.0769	0	0	4	5	0	2	7	4	0	460	46	0
6545.45	3	11.165	258.71	1	0	0	195	38	7.48636	0	627.273	784.091	15	0	0	4775.08	31.0385	0	0	0	10	0	4	27	6	3	3341	0	0
10909.1	3	5.427	304.36	2	0	0	4	3	18.7773	0	770	962.5	14	0	0	9477.69	27.1385	0	0	0	5	0	11	13	8	3	4221	422.1	0
6545.45	3	12.001	196.18	1	1	4	17	13	27.9	0	548.182	639.545	12	0	0	23820	93.5846	0	0	4	3	0	11	9	5	0	2219	221.9	0
24581.8	3	8.99	661.34	0	0	4	207	0	20.75	0	735	796.25	8	0	0	7986.92	31.7692	0	0	4	4	0	11	7	4	3	9247	924.7	0
7636.36	3	18.99	256.56	0	2	0	15	12	3.68727	0	763.636	827.273	5	0	0	3871.54	87.7	1	0	0	4	0	0	8	4	0	0	0	1
26181.8	3	12.639	791.32	0	0	0	35	14	13.2545	1	597.273	696.818	13	0	0	20906.3	21.4615	0	0	0	7	0	6	14	8	3	1025	205	0
12727.3	5	13.49	322.07	0	0	0	387	19	0.940909	0	564.545	705.682	3	5	0	8542.15	52.9	0	0	0	3	0	0	4	3	2	4398	439.8	0
12000	3	8.775	385.8	0	2	1	309	30	11.9545	0	622.727	778.409	18	1	0	38700.9	56.9692	0	0	1	12	0	5	30	20	0	0	0	1
6000	3	13.99	205.04	1	2	0	471	42	9.57	0	725	845.833	10	0	0	4984	38.3077	0	0	0	2	0	5	6	4	0	0	0	1
18000	3	11.99	597.78	1	0	0	66	14	18.7455	0	540	585	21	1	1	15856	49.7538	0	0	0	13	0	35	27	10	0	7301	730.1	0
16363.6	5	13.67	346.47	2	2	4	466	36	22.5164	0	695	868.75	10	0	0	34513.8	59.7692	1	0	4	7	0	1	16	12	5	5313	1593.9	0
15000	5	14.661	367.09	1	1	0	32	21	13.6227	0	730.909	791.818	12	0	0	16144.2	92	0	0	0	8	0	22	10	7	2	398	0	0
14900	5	22.45	415.35	0	2	0	855	40	30.64	0	556.364	602.727	13	0	0	9162.69	27.9692	0	0	0	9	0	19	16	12	0	0	0	1
12000	3	14.839	407.17	1	0	0	559	17	17.0345	1	758.182	884.545	10	0	0	6305.54	32.4	0	0	0	4	0	3	11	8	3	4789	478.9	0
7500	3	12.639	247.29	0	1	0	165	17	10.0636	1	710	769.167	14	0	0	7522.31	26.9538	1	0	0	7	0	2	27	9	3	2131	426.2	0
32727.3	3	10.791	1328.39	0	0	0	236	7	70.84	0	735	918.75	9	0	0	38826.3	64.7	1	1	0	6	0	6	7	4	3	4919	1475.7	0
24000	3	6.864	732.74	0	1	0	162	2	21.3545	0	605.455	756.818	13	0	0	29800	67.9385	0	0	0	3	0	19	7	5	3	9343	934.3	0
7200	3	10.99	235.69	1	1	0	300	9	11.6673	1	665	831.25	12	0	0	8576.62	41.5	0	0	0	5	0	8	9	3	0	853	85.3	0
10000	3	11.799	337.47	1	0	0	62	13	18.14	0	774.545	903.636	18	0	0	21204.6	40.9615	1	0	41578	6	0	12	25	18	1	4181	1254.3	0
6954.55	3	8.24	267.31	0	0	0	283	44	23.77	0	675	731.25	15	0	0	47013.5	66.5	0	0	0	9	0	10	16	7	3	4147	0	0
5909.09	3	15.41	174.34	1	1	0	25	13	9.06364	0	631.818	737.121	5	0	0	5956	43.2923	0	0	0	3	0	1	6	4	3	2376	237.6	0
20727.3	5	15.426	473.64	1	2	0	317	36	13.9527	0	763.636	827.273	17	0	0	18638.1	26.0769	1	0	0	8	0	4	16	14	1	1210	121	0
12272.7	5	17.57	377.41	1	1	0	141	13	15.5618	0	613.636	767.045	8	0	0	13824	60.3692	0	0	0	7	0	4	20	9	4	1450	290	0
9090.91	5	21.362	261.73	1	1	5	552	0	23.3345	0	650	758.333	6	0	0	5941	25.7	0	0	6	2	0	4	6	2	2	1515	454.5	0
6400	3	12.88	215.28	1	1	0	171	8	28.9545	3	720	900	16	0	0	13162.2	53.4231	0	0	0	6	0	26	12	7	3	939	187.8	0
17727.3	3	12.303	510.27	0	2	4	38	21	29.2091	4	670	781.667	16	0	0	34752.7	96.6923	0	0	25182	8	0	6	24	10	3	3556	1066.8	0
14545.5	3	11.997	541.65	1	2	0	82	34	43.1564	0	631.818	737.121	10	0	0	11214	78.9231	0	0	0	4	0	19	19	8	2	5959	1191.8	0
9818.18	3	15.984	324.29	2	1	2	27	12	28.2727	2	665	775.833	18	2	1	6636	56.6769	0	0	1583	5	0	11	20	10	0	0	0	0
29545.5	5	14.049	602.79	1	1	0	141	13	22.2364	0	741.818	865.455	16	2	0	22173.5	59.1692	1	0	0	7	0	11	8	7	0	0	0	1
2181.82	3	12.29	80.05	2	0	0	362	35	30.6273	0	675	731.25	14	0	0	42550.4	85	1	0	0	6	0	18	20	11	0	0	0	1
9818.18	5	16.841	287.44	1	1	0	131	6	17.6618	0	660	825	8	1	1	13528.3	80.0154	0	0	0	6	0	9	7	4	0	0	0	0
10363.6	3	8.888	298.05	2	1	0	628	24	14.9482	0	755	880.833	10	0	0	9894.77	25.2	0	0	0	4	0	22	18	10	0	0	0	0
27272.7	3	7.26	774.91	0	1	0	172	13	22.4345	2	609.091	659.848	11	0	0	42935.1	74.9538	0	0	0	8	0	2	19	9	0	0	0	0
11325	5	27.585	370.94	0	2	0	489	30	18.0655	0	556.364	649.091	11	1	0	9730	55.7308	0	0	0	7	0	6	19	10	0	0	0	0
26181.8	3	8.01	762.08	0	2	0	242	8	22.7127	0	576.818	672.955	11	0	0	27106	85.5	0	0	0	7	0	14	9	6	0	0	0	0
3181.82	3	10.15	113.19	1	0	0	221	8	16.8545	0	552.273	644.318	7	1	1	2237.31	29.4	0	0	0	4	0	7	13	8	0	0	0	0
17454.5	3	8.253	510.07	0	1	0	336	44	10.9882	1	564.545	658.636	8	0	0	19653.8	63.2154	1	0	0	4	0	11	21	13	0	0	0	0
21818.2	3	4.788	722.76	0	1	4	340	14	14.11	0	686.364	857.955	20	0	0	25755	35	0	0	4	6	0	40	27	12	0	0	0	1
13090.9	3	17.149	419.46	0	2	0	275	8	16.5927	0	747.273	809.545	13	1	1	6959	31.3846	1	0	0	11	0.00142201	11	26	14	0	0	0	0
9818.18	3	13.33	406.24	1	1	10	317	36	20.2545	0	665	775.833	10	1	1	8752.62	81	0	0	11	5	0	3	9	6	0	0	0	0
7272.73	3	7.551	252.14	0	1	0	129	30	22.2655	1	736.364	920.455	8	0	0	20143.8	103.923	0	0	0	2	0	11	7	4	0	0	0	0
29545.5	3	10.384	800.13	0	0	0	211	19	19.23	0	774.545	968.182	11	0	0	27201.9	65.9077	0	0	0	5	0	11	7	5	0	0	0	0
25000	3	21.672	981.88	0	2	0	235	8	13.6364	1	600	700	17	0	0	18898.9	98.7692	1	0	38	12	0	6	32	23	0	0	0	1
29090.9	5	11.061	716.53	0	2	2	85	19	14.49	0	730	912.5	20	0	0	74642	44	0	0	5	11	0	4	20	14	0	0	0	0
3000	3	8.69	93.88	0	0	2	155	0	25.32	0	580.909	726.136	11	0	0	18292	44.7692	1	0	664	5.69049	0.00142201	8.4678	14.659	8.09808	0	0	0	1
14727.3	5	13.739	404.88	0	1	2	345	20	19.7455	0	780	845	12	0	0	11029.6	33.9231	0	0	5	5	0	13	9	5	0	0	0	0
12000	5	9.99	254.91	0	0	0	418	45	29.5527	0	780	975	28	0	0	34673.1	47.5	0	0	0	7	0	21	24	15	0	0	0	0
12681.8	3	14.418	545.09	1	1	0	25	13	10.7182	0	544.091	589.432	5	0	0	7633	81.2	0	0	0	4	0	2	7	5	0	0	0	0
5000	3	9.99	161.32	0	1	0	63	14	23.7027	0	695	810.833	15	0	0	13460	86.8	0	0	0	5	0	30	9	3	0	0	0	0
31818.2	3	15.378	1195.88	2	2	2	614	3	10.1818	0	636.364	689.394	11	0	0	16185.2	76.1385	1	0	5	3	0	7	8	4	0	0	0	0
8636.36	3	6.534	294.47	1	0	0	203	30	18.4473	0	710	769.167	14	1	0	17591.1	30.5	1	0	0	9	0	1	18	9	0	0	0	1
8181.82	3	12.591	307.56	1	0	0	81	15	34.6036	0	675	731.25	14	0	0	49136	73.0154	0	0	0	12	0	4	14	7	0	0	0	0
10800	3	12.303	367.39	1	0	0	64	14	21.9273	0	600	650	8	0	0	4233.46	58.2	0	0	0	2	0	15	3	2	0	0	0	1
35454.5	5	22.45	836.27	0	2	0	91	7	20.28	0	720	840	11	1	0	33519.2	86.4923	0	0	0	9	0	3	11	5	0	0	0	1
4545.45	3	9.99	161.32	2	2	2	865	17	25.7455	1	604.545	705.303	12	3	0	23038.2	77.0769	0	0	5	11	0	5	13	5	0	0	0	0
10000	3	9.702	326.35	1	0	0	149	22	17.8091	0	741.818	865.455	11	0	0	11816.5	52.7692	0	0	0	6	0	6	15	10	0	0	0	0
20727.3	3	10.736	610.94	0	2	4	31	2	18.93	0	659.091	714.015	16	0	0	48900	47.8	1	0	234	5.69049	0.00142201	8.4678	14.659	8.09808	0	0	0	0
4375	3	26.521	171.9	1	2	0	136	8	27.3164	0	745	869.167	8	0	0	0	0	1	0	0	0	0	7	6	3	0	0	0	0
19090.9	5	9.449	431.76	0	2	2	14	11	10.35	0	807.273	874.545	23	0	0	3096	6.46154	0	0	5	7	0.00142201	17	9	7	0	0	0	0
3272.73	3	15.05	124.89	1	1	5	104	23	12.7527	0	725.455	785.909	4	0	0	607	10.8	0	0	6	1	0	8	7	3	0	0	0	0
14400	5	24.629	367.51	1	1	1	386	19	22.4182	0	636.364	795.455	13	0	0	9328.31	36.5	0	0	1	5	0	12	6	4	0	0	0	1
6545.45	3	9.17	191.28	0	0	4	772	0	8.72727	0	540	630	6	1	1	7493.23	64.6154	0	0	4	4	0.00142201	4	10	8	2	586	117.2	0
21818.2	5	21.483	629.6	0	0	0	528	22	18.3518	0	725.455	785.909	14	1	1	9448	61.3846	0	0	0	4	0	22	17	9	3	11173	3351.9	0
8000	3	14.289	269.52	1	0	0	204	24	30.46	1	700	758.333	16	1	1	6785.54	44.6769	1	0	0	6	0	17	20	9	3	2611	522.2	0
41363.6	3	19.789	1265.16	0	2	0	801	34	41.1927	0	560.455	653.864	10	3	0	9909.85	29.6308	1	1	0	7	0	7	9	5	2	5647	0	0
14545.5	5	20.2	425.69	2	1	0	455	13	19.9064	0	720	840	11	0	0	5277	49.6615	0	0	0	5	0	8	19	8	0	0	0	1
5454.55	3	27.335	198.41	1	0	10	92	18	7.49091	0	580.909	629.318	6	0	0	3186.92	28.5	1	1	11	4	0	0	9	5	3	2339	701.7	0
7659.09	3	8.991	271.82	0	0	0	184	26	22.4545	0	601.364	701.591	10	0	0	12598.2	43.3846	0	0	0	6	0	8	12	8	2	3403	680.6	0
28363.6	5	22.429	694.5	0	2	2	369	21	20.9	0	690	862.5	11	0	0	13155.7	69.8077	0	0	5	5	0	13	7	5	2	4905	981	0
9350	3	14.289	315	1	0	0	400	17	11.1455	0	736.364	797.727	8	1	1	7892.31	21.2308	1	0	0	8	0.00142201	14	19	11	3	3494	0	0
24545.5	5	33.715	982.62	1	2	0	242	8	6.80727	0	572.727	620.455	3	0	0	12164.9	92.3077	0	0	0	2	0	1	2	2	3	10641	1064.1	0
19636.4	3	9.229	567.3	0	1	2	66	14	29.32	0	695	868.75	27	0	0	42381.2	35.9	0	0	5	20	0	5	27	16	3	8945	2683.5	0
6545.45	3	8.01	190.52	0	0	2	576	23	26.8364	2	640.909	801.136	9	0	0	43793	88.6154	0	0	5	4	0	26	16	6	0	0	0	1
15272.7	5	26.991	452.87	0	1	0	275	8	16.3818	0	665	831.25	8	1	1	11434	53.7	0	0	0	4	0	7	8	6	0	0	0	1
35000	3	15.99	1230.33	1	2	4	495	14	9.9	2	660	770	8	0	0	14320	25.2	0	1	4	3	0	11	11	6	2	12858	0	0
8202.27	3	11.997	339.38	1	1	0	99	8	26.9018	1	572.727	620.455	14	0	0	8780.77	26.1923	1	0	0	7	0	9	18	10	0	0	0	1
5400	3	10.49	214.49	1	1	5	238	22	16.4618	0	725.455	846.364	13	1	1	5302.77	20.9538	0	0	6	5	0	6	17	8	0	142	0	0
19636.4	3	13.185	620.9	0	1	0	251	8	17.23	0	640.909	747.727	8	0	0	12751	75.8077	0	0	0	5	0	2	10	8	3	1753	350.6	0
20000	3	8.6	632.28	0	1	0	31	2	11.33	0	730	790.833	17	0	0	13278.5	30.0923	1	0	30346	6	0	6	17	7	0	5315	1594.5	0
24545.5	5	14.049	723.34	2	2	0	279	17	24.3364	0	725	906.25	12	0	0	26280.9	55.7308	1	0	0	6	0	4	13	4	5	9622	2886.6	0
35454.5	3	8.775	964.5	1	2	0	17	13	18.0655	3	736.364	797.727	14	0	0	91220.3	88.6154	0	0	0	11	0.00142201	7	16	12	3	8476	847.6	0
8272.73	3	8.18	219.94	0	0	4	49	12	14.58	0	600	650	7	1	1	3146	42.5	1	0	4	4	0	3	12	4	1	208	41.6	0
11818.2	3	14.09	444.88	1	0	0	64	14	18.7418	2	631.818	684.47	20	0	0	15662.8	36.2308	1	0	22915	5.69049	0.00142201	8.4678	14.659	8.09808	0	1145	114.5	0
37936.4	5	14.049	773.98	0	2	0	435	36	5.43273	0	576.818	672.955	6	0	0	12696	70.1538	0	0	0	4	0	3	9	8	2	2507	0	0
23636.4	3	10.908	665.44	0	0	4	643	45	12.5591	0	580.909	629.318	15	0	0	12716.5	69.7846	1	0	58157	5.69049	0.00142201	8.4678	14.659	8.09808	0	914	0	0
11818.2	3	18	371.64	1	1	5	196	14	4.21818	0	680	736.667	7	0	0	183	5.44615	1	0	6	2	0	5	5	2	3	778	233.4	0
15363.6	3	6.71	399.69	0	1	4	458	5	9.61	0	556.364	649.091	9	0	0	20026.2	36.1846	0	0	4	5	0	0	9	8	1	3038	0	0
10000	3	4.788	301.15	1	0	0	166	8	8.26364	1	740	925	8	0	0	546	1.5	0	0	0	1	0	4	9	4	3	1222	244.4	0
10909.1	3	15.389	341.73	0	1	2	221	8	8.7	0	670	725.833	3	1	1	6386.54	85.1846	0	0	5	2	0	5	5	4	1	2720	272	0
10909.1	3	18.49	363.99	1	0	0	156	18	12.2182	0	600	700	10	0	0	13130.8	76.4308	1	0	299	9	0	3	18	14	0	0	0	1
11818.2	3	8.39	315.17	1	0	4	156	18	16.8464	1	670	837.5	12	1	1	6802.92	32.1	0	0	4	9	0	4	14	10	3	3326	665.2	0
10472.7	3	15.389	328.06	0	1	8	86	35	28.7727	0	675	731.25	16	0	0	21540	73.2692	0	0	9	9	0	5	15	6	1	4519	0	0
12000	3	7.667	339.5	0	2	0	4	3	16.7	0	790	921.667	9	0	0	2735.77	10.2	0	0	162	3	0	5	14	5	0	646	129.2	0
11818.2	3	16.115	344.95	2	2	9	116	14	31.55	0	680	850	10	0	0	6849	89.9231	0	0	10	2	0	12	3	3	0	0	0	1
24995.5	3	16.115	729.56	0	2	0	304	8	15.6927	0	564.545	611.591	18	0	0	30024.6	92.6538	1	0	0	15	0	1	25	21	3	4799	479.9	0
26181.8	3	10.026	787.33	1	2	0	124	13	8.15727	0	622.727	778.409	13	0	0	11430.5	44.6769	1	0	35089	4	0	6	23	14	2	243	72.9	0
26500	3	7.26	821.4	0	1	0	260	21	11.8727	0	564.545	658.636	6	0	0	9284.31	58.5846	0	0	0	1	0	9	14	4	0	6850	0	0
17454.5	3	13.189	637.63	0	0	4	44	26	26.8445	0	725	845.833	16	0	0	23465.8	53.3077	0	0	4	9	0	7	15	11	3	3388	0	0
12272.7	3	14.663	507.8	1	1	1	362	35	16.6418	0	556.364	695.455	10	0	0	14189	66.9	0	0	1	7	0	4	9	5	2	5900	1180	0
21818.2	3	12.294	680.26	0	1	0	161	14	34.2764	0	730.909	913.636	14	0	0	19964	79.3846	1	0	0	9	0	6	18	10	0	0	0	1
7500	3	12.582	256.26	1	0	4	48	10	11.7818	0	725.455	785.909	8	0	0	14244.2	86.9538	0	0	4	7	0	9	25	13	2	2306	691.8	0
5454.55	3	6.714	155.44	1	1	4	566	30	4.16455	0	735	796.25	8	0	0	3892	6.46154	0	0	4	6	0	1	7	7	3	1892	0	0
11236.4	5	13.99	239.61	1	0	0	98	19	34.8982	0	741.818	865.455	10	1	0	5384.62	31.1	0	0	0	3	0	4	9	5	0	0	0	1
17727.3	5	28.358	447.16	1	1	6	45	21	8.23	0	785.455	981.818	3	0	0	8034.23	90.3538	1	0	7	2	0	2	3	2	2	4781	478.1	0
21818.2	3	11.511	671.86	1	2	0	472	3	11.3809	0	576.818	721.023	11	1	0	11786.8	65.4462	0	0	0	3	0	2	15	10	3	7561	0	0
13090.9	3	8.01	381.04	0	0	4	197	4	4.5	0	720	780	8	0	0	17756.5	34.8	1	0	4	5.69049	0.00142201	8.4678	14.659	8.09808	2	5429	542.9	0
35000	3	11.539	1137.43	1	2	4	110	13	10.3309	0	556.364	602.727	12	0	0	49275.7	93.8077	1	0	4	11	0	2	24	19	3	1109	0	0
21818.2	3	10.439	768.68	0	0	2	89	3	0.563636	2	700	875	18	0	0	154.154	0.346154	1	0	5	3	0	10	25	14	0	0	0	1
15545.5	5	30.99	626.32	2	1	0	710	45	16.83	0	576.818	624.886	18	0	0	17855.8	32.4231	0	0	0	10	0	8	15	8	0	9341	934.1	0
14181.8	3	8.349	404.92	2	0	0	42	26	7.6	0	613.636	767.045	14	0	0	9350	21	1	0	0	9	0	1	29	19	0	2769	830.7	0
12272.7	3	7.601	462.54	2	1	5	535	17	14.1055	0	807.273	941.818	7	0	0	7167.69	29.9	1	0	11933	5.69049	0.00142201	8.4678	14.659	8.09808	3	3834	1150.2	0
3636.36	3	13.041	137.67	1	2	0	116	14	5.69455	0	670	781.667	22	0	0	9237.69	32.4154	1	0	0	12	0	6	26	8	3	441	44.1	0
818.182	3	6.741	31.11	1	1	5	492	36	4.5	0	572.727	715.909	7	0	0	2672.31	19.4769	0	0	6	4	0	10	11	5	3	233	0	0
5454.55	3	10.439	192.17	1	1	4	173	32	21.86	0	769.091	897.273	7	0	0	4785.23	84.2308	0	0	4	3	0	11	4	3	3	471	47.1	0
21818.2	3	10.725	643	0	1	2	135	33	11.44	0	556.364	695.455	10	0	0	0	0	0	0	5	0	0	17	6	4	0	4634	0	0
27272.7	5	9.99	637.27	0	1	0	412	13	16.25	0	810	877.5	13	0	0	15683.1	13.7	0	0	0	4	0	3	16	12	0	5709	570.9	0
20454.5	5	28.413	746	2	2	5	156	18	20.1709	0	548.182	593.864	16	0	0	38233.8	72.6462	1	0	6	8	0	6	15	8	0	203	40.6	0
10063.6	5	28.49	386.62	0	2	0	473	8	18.9909	0	725.455	785.909	9	1	1	2953.85	86.5	0	0	0	3	0	10	3	3	0	0	0	1
5454.55	3	11.539	194.99	0	1	0	390	13	1.33364	1	609.091	761.364	9	2	0	1873.85	11.0769	0	0	0	3	0	1	27	13	3	600	180	0
9163.64	3	14.52	289.22	0	0	0	137	32	37.33	0	758.182	884.545	18	0	0	22855	63.1385	0	0	0	8	0	10	23	10	1	2893	0	0
21850	3	15.61	763.99	1	2	4	157	8	24.1545	0	640.909	694.318	7	0	0	22408	102.231	1	0	22093	5	0	1	9	5	3	5673	1701.9	0
28000	3	8.998	879.75	0	0	0	81	15	24.36	0	585	682.5	13	0	0	30263.1	41.4615	0	0	0	6	0	9	16	9	1	8945	2683.5	0
10000	3	11.061	333.53	1	2	5	42	26	14.3018	0	600	700	5	0	0	7999.62	85.1538	0	0	6	3	0	5	4	2	3	4644	1393.2	0
9818.18	5	8.253	250.1	0	0	0	671	13	19.4564	0	758.182	947.727	22	0	0	29928.9	56.7538	0	0	0	8	0	8	49	34	0	0	0	1
8509.09	3	5.852	216.83	0	0	4	335	8	12.1091	0	585	633.75	18	0	0	11919.7	32.4	1	0	4	10	0	5	17	3	3	121	12.1	0
18000	3	23.639	682.69	0	1	4	227	35	19.8873	0	600	650	15	2	2	14470	47.8846	1	0	4	7	0	34	12	6	3	8503	2550.9	0
8450	3	15.813	303.67	0	2	0	324	10	28.74	1	604.545	755.682	14	0	0	44483	69.6923	1	0	0	6	0	7	12	9	0	0	0	1
34036.4	3	8.253	994.63	0	1	0	35	14	21.9091	0	613.636	664.773	8	0	0	36822	78.8308	0	0	0	3	0	2	10	6	3	14950	1495	0
34952.3	5	17.091	767.03	1	1	0	171	8	23.0182	0	752.727	878.182	15	0	0	17766.5	52.9	1	0	0	9	0	15	15	9	0	0	0	1
16363.6	3	12.59	669.94	1	2	0	277	8	12.7	0	720	840	5	0	0	13346	36.4615	0	0	0	2	0	5	6	3	3	684	205.2	0
11818.2	3	16.61	347.15	1	0	7	34	18	26.4182	0	556.364	602.727	8	0	0	15052	98.2154	0	0	2348	1	0	14	19	5	0	618	61.8	0
3545.45	3	15.763	103.02	0	2	0	420	4	34.3418	0	665	775.833	12	0	0	43088.1	79.2	1	0	727	10	0	4	17	12	0	0	0	1
17672.7	3	13.519	720.43	0	1	0	526	20	29.25	0	705	822.5	6	0	0	51032.2	108.769	1	0	0	3	0	6	6	4	1	9360	936	0
22409.1	5	19.789	625.82	0	0	0	290	18	14.6455	0	618.182	772.727	11	1	1	4347	34.1538	0	0	0	6	0	8	19	8	3	816	244.8	0
8181.82	3	8.668	312.81	1	0	1	19	14	3.46	0	755	880.833	5	0	0	5138	28.8615	1	0	16334	5.69049	0.00142201	8.4678	14.659	8.09808	3	1389	277.8	0
6450	3	21.672	253.33	0	2	2	320	13	5.37818	0	741.818	865.455	7	0	0	4104.92	54.9	1	0	5	5	0	0	6	6	2	214	21.4	0
17727.3	3	13.545	520.35	0	0	4	201	2	23.3918	0	618.182	772.727	6	0	0	3082.15	34.8	0	1	4	3	0	10	11	4	0	352	0	0
30545.5	3	15.763	961.47	1	2	0	111	8	23.39	0	618.182	721.212	8	0	0	46287.7	81.4154	1	0	28	4	0	7	5	5	2	11772	2354.4	0
37636.4	3	12.303	1173.61	1	1	4	99	8	11.54	1	556.364	602.727	6	0	0	9229	49.2	0	0	4	2	0	2	9	4	0	5329	1598.7	0
22909.1	3	10.323	692.2	0	2	0	547	46	32.37	1	600	750	20	1	1	22842	57.6923	0	0	0	11	0	25	17	5	0	2569	770.7	0
10000	3	10.15	355.72	1	0	4	91	7	28.89	3	695	810.833	18	0	0	7024.62	39.5077	1	0	4	9	0	9	21	4	0	4766	953.2	0
38181.8	3	19.327	1257.8	0	2	0	328	3	24.0955	0	631.818	684.47	22	0	0	38425.4	44	0	0	0	18	0.00142201	9	28	18	3	2010	201	0
19854.5	5	12.089	365.19	1	1	4	414	0	24.6636	0	752.727	815.455	16	0	0	14678.5	63.4	1	0	4	4	0	12	9	5	1	2297	459.4	0
3636.36	3	20.075	145.12	2	2	1	90	21	15.9545	0	730.909	913.636	11	0	0	6820.62	52.9615	1	0	1	2	0	5	7	2	0	1874	562.2	0
18763.6	3	4.788	517.98	0	0	0	112	23	20.79	0	790.909	922.727	10	1	1	11442.5	50.2154	0	0	0	3	0	14	5	4	3	4964	0	0
10000	3	14.014	335.69	2	1	0	387	19	22.2636	0	690	805	9	0	0	7551.92	43.1	0	0	0	5	0	8	8	5	3	2268	453.6	0
40000	5	8.789	810.87	0	1	0	79	2	15.2091	0	812.727	1015.91	23	0	0	24598	17.4462	0	0	0	14	0	6	26	18	2	12934	2586.8	0
13636.4	3	9.891	491.01	0	1	0	52	19	31.0336	0	752.727	878.182	11	2	1	14658.5	93.0462	1	0	0	6	0	36	7	4	2	4949	1484.7	0
7272.73	3	13.882	268.09	0	2	0	340	14	34.5273	0	675	731.25	11	0	0	9375.69	71.5385	0	0	0	5	0	8	7	2	3	363	36.3	0
18181.8	3	15.389	683.46	2	1	0	104	23	6.03	0	580.909	726.136	19	0	0	14786	29.5	0	0	0	4	0	1	22	19	0	0	0	1
13636.4	3	22.539	561.21	1	1	0	115	8	24.2182	0	556.364	695.455	12	0	0	8256	70.0385	1	0	0	8	0	4	11	2	0	0	0	1
21818.2	3	15.037	680.36	0	1	2	99	8	4.67273	0	605.455	655.909	16	0	0	4514.77	12.7	0	0	5	7	0	5	16	5	1	1514	0	0
28000	3	5.616	854.87	0	0	4	13	10	16.6909	0	677.273	846.591	8	0	0	30490.9	65.9077	0	0	4	5	0	1	20	14	0	0	0	1
5454.55	3	9.675	163.11	0	2	0	143	8	7.98545	0	609.091	710.606	9	0	0	11473.8	72.5769	0	0	0	7	0	1	17	5	1	2406	481.2	0
11636.4	5	18.99	331.97	0	1	0	32	21	22.5818	0	544.091	589.432	22	0	0	50330	94.6154	0	0	0	11	0	20	14	8	0	0	0	1
4363.64	3	7.392	123	0	1	0	19	14	13.1727	0	755	880.833	13	0	0	8885	16.1	0	0	0	6	0	13	10	4	3	1114	334.2	0
9818.18	3	12.254	393.67	1	0	0	317	36	10.76	0	636.364	742.424	9	0	0	17619.7	65.0769	1	0	38516	6	0	3	8	7	3	1360	136	0
3500	3	15.389	119.61	2	2	5	759	15	26.1245	0	568.636	663.409	9	0	0	9240	58.6923	1	0	6	4	0	10	17	13	3	839	0	0
11818.2	3	11.511	335.93	1	0	0	149	22	20.8818	0	774.545	903.636	7	1	1	4551.92	33.2308	0	0	0	5	0	5	6	2	0	0	0	1
9090.91	3	18.75	365.3	0	2	0	347	14	14.7273	1	741.818	927.273	16	0	0	11865.5	52.5	1	0	0	10	0	19	17	10	3	1211	363.3	0
41363.6	3	12.155	1146.69	0	1	0	540	13	6.25909	0	589.091	638.182	12	0	0	24238	50.8615	0	1	0	4	0	15	28	14	0	16144	1614.4	0
14802.3	3	13.99	428.02	1	1	4	715	13	15.06	5	690	862.5	19	0	0	11701.8	69.7	0	0	4	7	0	19	12	5	3	5465	0	0
7363.64	3	12.582	307.52	1	2	3	541	3	13.7182	0	685	856.25	4	0	0	584.308	31.6	1	0	13200	5.69049	0.00142201	8.4678	14.659	8.09808	2	1921	0	0
23636.4	5	19.791	552.27	2	1	6	300	9	13.9182	0	618.182	669.697	5	0	0	9433.85	76.6769	0	0	7	3	0	17	7	3	2	5602	1120.4	0
22779.5	5	16.99	478.93	0	1	0	190	17	20.5527	0	548.182	685.227	7	2	1	9627	86.3077	0	0	0	4	0	3	4	3	2	1395	418.5	0
18000	5	14.661	538.4	1	2	0	167	8	26.4518	0	622.727	778.409	20	0	0	19216	57	0	0	173	7	0	8	29	13	0	0	0	1
5727.27	3	7.101	219	1	0	0	53	19	11.5	0	680	850	7	2	1	1316	3.69231	0	0	0	6	0.00142201	5	12	7	1	2893	867.9	0
9818.18	3	20.889	439.82	0	2	0	7	0	25.0036	0	576.818	624.886	14	0	0	22370.9	45.3	0	0	0	9	0	3	20	10	1	2422	242.2	0
40000	5	13.882	902.37	0	1	2	48	10	4.50909	0	758.182	884.545	5	1	1	633.462	23.6923	0	0	5	2	0	4	11	2	0	0	0	1
16363.6	3	15.543	644.18	0	2	5	23	9	11.4	0	780	910	11	0	0	22322.3	73.8	1	0	6	6	0	4	16	7	0	1913	191.3	0
23636.4	3	12.837	661.14	0	1	4	2	2	20.2727	0	585	731.25	15	0	0	27539.1	53.8	1	0	4	12	0	4	19	13	0	683	136.6	0
23636.4	3	12.99	673.79	1	2	0	62	13	16.8818	0	659.091	823.864	20	0	0	14820.6	27.3538	0	0	0	9	0	10	28	15	1	6985	0	0
22727.3	3	6.291	771.82	0	2	3	272	0	3.10091	0	642.273	749.318	13	0	0	7944.92	8.7	0	0	3	4	0	11	25	12	3	5687	1137.4	0
10909.1	3	10.99	392.81	1	0	0	187	9	13.05	0	665	720.417	10	0	0	14988.6	86.7692	1	0	0	8	0	15	15	6	0	2892	578.4	0
24545.5	5	14.049	651.01	0	1	0	129	30	28.32	0	780	910	32	0	0	30054.5	42	0	0	0	25	0	5	45	33	0	0	0	1
16363.6	3	6.49	459.67	0	0	0	495	14	13.37	0	605.455	756.818	19	0	0	19482	24.1231	0	0	0	6	0	14	47	25	0	2190	657	0
22454.5	3	9.135	614.42	0	0	4	152	14	26.5545	1	705	763.75	9	0	0	23466.9	73.7	0	0	4	4	0	7	15	10	3	5016	0	0
6000	3	8.253	191.28	0	0	0	266	31	15.9455	0	556.364	695.455	9	0	0	3170	41.7	1	0	0	2	0	10	11	6	3	1656	496.8	0
23613.6	5	23.22	774.64	1	2	5	251	8	24.5727	0	622.727	674.621	11	0	0	18435.8	91.5	0	0	173	8	0	6	14	9	0	0	0	1
13090.9	3	7.689	370.48	0	1	9	368	3	25.8109	0	685	799.167	15	2	1	15501.2	39.3462	0	0	10	8	0	23	19	8	3	703	0	0
8727.27	3	14.31	274.63	0	2	0	25	13	5.10545	0	600	650	5	2	0	8045.54	72.6	1	0	0	4	0	0	6	5	1	3756	751.2	0
13745.5	3	11.14	551.13	1	0	4	4	3	8.54	0	627.273	784.091	10	0	0	29770.4	74.0923	1	0	808	8	0	1	15	8	2	5345	0	0
2181.82	3	16.01	70.33	0	1	0	194	38	32.78	0	645.455	753.03	8	0	0	13470.2	85.9615	1	0	0	3	0	12	13	10	1	788	157.6	0
20454.5	3	8.496	800.13	2	1	0	89	3	12.3818	1	720	780	14	0	0	20805.1	47.0769	0	0	0	6	0	6	21	9	2	9092	0	0
4090.91	3	8.937	161.18	0	2	1	616	0	3.61091	0	760	886.667	3	0	0	1545	24.5538	0	1	1	2	0	0	3	3	3	138	41.4	0
20000	5	22.22	532.11	1	2	0	135	33	24.96	0	645.455	699.242	11	0	0	10919.1	86.6769	1	0	26	7	0	6	8	6	2	4289	0	0
21204.5	3	14.09	798.22	0	2	4	476	5	22.6964	0	741.818	927.273	9	0	0	17948	83.1923	1	0	44369	5	0	13	12	5	2	4320	1296	0
15400	5	19.327	387.47	0	0	0	81	15	4.09	0	609.091	761.364	6	1	1	5200.46	9.41538	0	0	0	1	0	5	13	9	4	1245	373.5	0
16363.6	3	6.62	460.56	0	0	2	16	5	1.78	0	770	834.167	5	0	0	155.769	3.46154	1	0	664	1	0	6	5	5	0	0	0	1
4800	3	12.897	164.83	0	1	0	222	12	7.27364	1	665	775.833	7	0	0	21124.9	66.9231	1	0	0	3	0	10	11	4	3	888	0	0
19759.1	3	16.489	837.05	0	1	0	669	24	16.8	0	548.182	593.864	7	0	0	8223	49.5692	1	1	0	4	0	28	8	2	3	3715	371.5	0
12409.1	3	11.99	348.71	1	0	0	579	20	24.4455	0	705	763.75	8	0	0	3722	28.4308	0	0	0	3	0	14	13	4	3	1293	0	0
8400	3	7.579	258.95	2	0	4	495	14	29.4	0	774.545	839.091	8	0	0	20981.5	93.6923	0	0	4	3	0	10	9	4	0	64	6.4	0
26181.8	3	5.32	722.76	0	2	4	306	26	9.42545	0	690.909	863.636	8	0	0	26991	40.8923	0	0	4	2	0	2	13	7	0	2586	517.2	0
5000	3	16.522	173.38	1	0	3	693	19	18.0218	0	774.545	903.636	7	0	0	16234.6	53.9538	1	0	3	4	0	4	7	3	1	737	0	0
5909.09	3	10.99	163.67	2	1	4	603	13	17.1573	2	736.364	920.455	16	3	0	7119.69	61.4923	1	0	4	10	0	5	31	16	3	1076	322.8	0
7090.91	3	12.639	197.83	0	1	4	759	15	21.3455	0	725.455	846.364	6	0	0	3015.69	20.6538	1	0	4	3	0	10	6	4	3	1694	0	0
12436.4	5	14.663	348.42	1	1	0	195	38	25.7564	0	631.818	737.121	18	1	1	16323	49.5385	0	0	0	12	0	12	18	6	5	3881	776.2	0
26400	5	18.891	654.56	0	2	0	130	33	20.29	0	774.545	968.182	9	0	0	28078.2	84.5769	0	0	0	6	0	3	13	11	0	0	0	1
6545.45	3	11.55	264	0	0	0	412	13	9.68	0	609.091	710.606	9	0	0	6533.69	58.3	1	0	0	6	0	1	6	6	0	3530	706	0
10909.1	3	13.11	404.97	0	0	0	152	14	20.6364	0	741.818	803.636	14	0	0	23483.4	95.7692	1	0	53	12	0	5	16	11	3	381	114.3	0
35000	5	11.358	789.57	0	0	0	420	4	31.7455	1	715	834.167	13	0	0	242464	98.0769	0	0	0	5	0.00142201	16	10	8	5	11621	3486.3	0
25750	5	17.57	647.88	1	2	5	293	0	32.59	0	758.182	884.545	13	0	0	26157	69.7846	0	0	6	7	0	11	18	7	4	3769	753.8	0
18181.8	3	10.179	657.72	0	2	0	13	10	8.87273	1	572.727	668.182	16	0	0	10619.5	13.4769	0	0	0	7	0	4	24	13	3	7572	757.2	0
24545.5	3	16.425	1088.34	0	2	2	614	3	14.5636	2	680	793.333	10	1	0	4339.38	43.8462	1	0	5	6	0	3	14	12	3	2721	0	0
35000	3	15.31	1218.61	1	2	0	38	21	15.7964	1	780	975	12	0	0	27165	51.9692	1	0	0	5	0	19	22	13	0	0	0	1
3559.09	3	6.99	134.3	1	1	8	590	8	10.7018	0	704.545	880.682	8	0	0	395.077	2.47692	0	0	9	4	0	1	6	4	3	1948	0	0
35454.5	5	22.99	845.55	1	2	0	790	41	18.2045	0	736.364	920.455	9	0	0	30459.7	77.9077	1	0	0	5	0	12	12	10	5	1412	141.2	0
20000	3	5.32	602.3	0	0	0	108	21	21.16	0	805	1006.25	16	0	0	6865.85	9.1	0	0	0	9	0	5	13	9	0	5024	502.4	0
6000	3	14.421	185.61	0	2	8	521	24	23.9345	0	752.727	878.182	9	0	0	1428.46	51.2615	1	0	3270	2	0	18	20	9	0	0	0	1
10690.9	3	10.087	312.42	0	0	4	42	26	16.5818	0	715	834.167	14	0	0	9360	48.7846	1	0	4	8	0	5	17	6	1	3752	750.4	0
8181.82	3	11.14	328.06	0	1	4	184	26	9.34909	0	690	747.5	14	0	0	18870	66.9231	0	0	24043	7	0	7	20	11	2	1768	530.4	0
10909.1	3	15.389	341.73	0	2	11	390	13	35.2582	1	747.273	871.818	20	0	0	28764	58.8462	0	0	2	8	0	6	41	15	0	0	0	1
909.091	3	14.069	33.6	1	0	0	116	14	2.78182	0	609.545	660.341	11	0	0	1638	1.9	1	0	0	8	0	0	16	15	3	287	0	0
26000	5	17.149	626.62	0	2	4	418	45	17.16	0	604.545	755.682	12	0	0	20122.3	89.0769	1	0	4	8	0	9	13	8	0	0	0	1
4363.64	3	12.089	130.94	1	0	4	75	33	14.89	0	695	810.833	8	0	0	5070.15	69.6923	1	0	4	6	0	2	7	4	1	640	64	0
11818.2	3	10.725	321.5	1	1	0	64	14	34.19	1	631.818	789.773	19	0	0	13295.8	49.0154	0	0	0	6	0	27	24	11	1	3578	0	0
5454.55	3	5.427	182.62	0	0	4	521	24	11.7164	0	640.909	801.136	13	0	0	21629.5	49.3231	1	0	4	6	0	1	17	4	2	2413	723.9	0
10800	5	21.99	298.23	2	1	2	116	14	16.4364	0	540	630	21	0	0	19543	75.9231	1	0	5	8	0	6	17	8	3	4179	1253.7	0
11345.5	3	12.69	322.04	0	2	4	340	14	11.4364	0	670	781.667	15	0	0	25421.8	51.8769	0	0	4	8	0	10	32	18	3	4095	819	0
14725	3	12.683	485.79	0	0	0	19	14	28.5382	0	659.091	823.864	8	0	0	37344.9	97.0308	0	0	0	5	0	13	11	8	3	6236	1247.2	0
4659.09	3	15.939	176.39	1	1	0	141	13	22.3545	0	720	780	13	0	0	4230	17.8154	0	0	0	5	0	5	19	8	3	1486	445.8	0
13000	3	17.919	388.31	1	2	4	203	30	13.46	0	690	805	3	0	0	10067	89.3077	1	0	52522	3	0	0	6	5	2	4191	1257.3	0
9190.91	3	15.77	295.25	2	1	4	74	30	29.6	0	695	810.833	17	0	0	51812.3	83.2	0	0	4	11	0	9	18	11	0	0	0	1
12272.7	3	20.889	549.77	0	1	2	27	12	15.5	0	604.545	755.682	18	2	1	11076.9	54.1154	0	1	5	13	0	5	15	7	1	3004	901.2	0
4090.91	3	4.788	150.58	0	1	0	319	0	10.2273	0	585	633.75	11	0	0	69952.6	80.7692	1	0	0	9	0.00142201	9	34	21	1	778	0	0
27272.7	3	12.69	838.63	1	2	4	343	27	10.9727	0	552.273	690.341	6	0	0	15869	110.923	1	0	4	4	0	4	5	5	3	5274	527.4	0
18181.8	5	18.799	498.02	1	1	4	401	24	19.6182	0	675	843.75	30	0	0	26420.8	68.0769	0	0	4	11	0.00142201	19	43	25	0	0	0	1
6545.45	3	17.171	209.79	0	0	4	491	30	23.85	0	741.818	803.636	18	0	0	31336	82.4308	1	0	4	14	0	9	22	5	2	2699	809.7	0
25454.5	5	23.247	835.52	1	2	0	31	2	11.3645	1	665	775.833	21	0	0	14541.7	96.2308	1	0	0	5	0	24	11	8	0	2378	713.4	0
14181.8	3	7.9	375.49	0	0	4	195	38	8.98	1	715	834.167	9	1	1	6025.85	46.7308	1	0	42683	7	0	4	16	13	0	5734	0	0
14181.8	3	8.253	382.55	0	1	0	280	9	11	0	818.182	886.364	14	0	0	6504	20.3538	0	0	0	4	0	10	29	14	3	5853	0	0
9000	3	4.788	271.04	0	0	0	145	8	20.22	0	650	758.333	11	0	0	22752.2	69.7846	0	0	0	3	0	15	14	8	3	2444	488.8	0
31227.3	5	18.997	715.57	0	2	0	781	40	23.06	0	705	822.5	14	0	0	27620.9	50.5	1	0	0	5	0	10	23	17	5	10932	1093.2	0
7090.91	3	14.014	201.42	1	1	0	512	21	17.07	0	548.182	685.227	7	0	0	5052.92	61.8462	0	0	0	4	0	7	18	10	0	0	0	1
1636.36	3	7.056	62.53	2	0	5	149	22	13.4945	0	785	850.417	10	0	0	4267.38	16.7	1	0	6	4	0	8	9	4	1	751	0	0
10843.2	3	14.289	309.1	0	2	0	178	23	5.98909	0	769.091	833.182	10	0	0	2066.77	14	0	0	0	5	0.00142201	4	34	15	0	0	0	1
9818.18	3	6.273	370.37	1	0	0	41	25	17.4927	0	593.182	741.477	16	0	0	17714.3	40.8154	1	0	0	4	0	19	16	9	3	1795	179.5	0
16545.5	3	9.79	444.55	0	0	4	4	3	16.3727	0	576.818	672.955	16	0	0	27983	49.5385	0	0	48100	4	0	9	21	16	3	2056	0	0
9681.82	3	12.015	360.64	0	1	0	102	26	8.58273	0	600	650	6	4	1	5204.77	57.5	0	0	0	4	0	2	15	10	1	4162	832.4	0
8509.09	3	23.595	272.93	1	0	0	193	13	12.99	0	715	774.583	8	1	1	7821.69	55.8462	0	0	0	4	0	4	6	3	1	2330	233	0
20000	5	14.014	452.41	0	1	4	500	27	4.01818	3	665	775.833	12	0	0	15186.5	88.7308	0	0	4	8	0	2	11	6	4	5675	0	0
4363.64	3	12.015	135.46	0	0	0	160	4	19.41	0	631.818	684.47	9	0	0	5278	48.6923	0	0	0	3	0	14	11	7	0	850	170	0
8181.82	3	12.529	329.24	0	0	2	241	7	13.8436	0	645.455	699.242	5	0	0	9857.08	57	0	0	5	3	0.00142201	2	4	3	0	3339	333.9	0
16590.9	3	7.139	559.27	0	0	4	5	4	10.0909	0	672.727	784.848	6	0	0	16581.2	54.8154	0	0	4	1	0	7	4	2	0	7085	708.5	0
11818.2	3	12.231	339.79	0	0	2	518	1	12.1455	1	576.818	624.886	9	0	0	654.231	3.32308	0	0	5	2	0	7	11	6	0	0	0	1
9927.27	3	15.378	287.02	2	1	0	674	11	23.6636	0	720	780	13	1	1	5880	27	0	0	0	5	0	10	26	12	0	0	0	1
30727.3	5	8.49	533.31	0	2	0	164	20	8.85273	0	741.818	927.273	7	0	0	29612	66.5	1	0	0	5	0	6	11	5	0	0	0	0
16675	5	15.61	402.06	1	2	0	408	14	24.6818	1	700	875	18	0	0	78.4615	2.58462	0	0	0	1	0	24	25	13	0	0	0	0
7272.73	3	11.115	267.06	0	0	2	139	8	20.6727	0	627.273	784.091	15	0	0	22375.2	85.0385	0	0	36004	10	0	7	13	8	0	0	0	1
27000	3	14.049	944.05	2	2	0	371	7	16.2736	0	670	725.833	16	0	0	20145	101.538	1	0	0	12	0	10	21	6	0	0	0	0
5909.09	3	11.99	166.05	0	2	2	389	8	2.54545	0	609.091	710.606	9	0	0	14321.5	81.8077	1	0	2627	3	0	1	7	2	0	0	0	0
20000	3	10.087	637.58	0	0	4	105	17	10.89	1	631.818	684.47	6	0	0	31786	87.3	1	0	4	3	0	8	16	12	0	0	0	0
10000	3	9.17	318.79	2	2	0	286	16	9.97273	8	609.091	710.606	11	0	0	6165.23	40.3846	1	0	0	6	0	11	23	6	0	0	0	0
22090.9	3	14.498	912.08	0	1	1	166	8	11.3891	1	665	831.25	7	0	0	54032.3	91.5385	0	0	1	6	0.00142201	1	8	6	0	0	0	0
15000	3	8.253	478.19	2	0	0	803	33	19.1127	1	544.091	680.114	13	0	0	14516.9	38.7	0	0	0	6	0	7	13	11	0	0	0	0
20000	5	18.689	496.95	1	1	0	74	30	18.1364	0	685	856.25	6	1	0	22194.2	82.9	0	0	0	4	0	3	18	13	0	0	0	1
6800	3	5.852	204.79	1	0	0	239	7	10.08	0	850.909	1063.64	10	0	0	3833.08	10.8462	1	0	0	3	0	5	7	7	0	0	0	0
41363.6	3	18.25	1269.73	0	2	2	290	18	16.92	0	774.545	968.182	13	0	0	30866.8	98.0769	0	0	5	4	0.00142201	13	17	10	0	0	0	1
17727.3	5	12.59	338.16	0	2	0	240	21	18.8818	1	725.455	846.364	16	0	0	14178.5	36.4615	0	0	0	9	0	4	27	13	0	0	0	1
12218.2	3	14.33	384.59	0	0	4	315	23	10.5	1	540	630	13	0	0	9586	68.3077	1	0	48381	8	0	4	17	11	0	0	0	0
7636.36	3	13.67	285.75	0	1	0	23	9	18.84	0	544.091	589.432	7	0	0	5055	100.8	0	0	0	3	0	5	10	6	0	0	0	1
3636.36	3	12.837	132.23	0	2	4	33	22	7.01	0	548.182	593.864	11	1	1	8729.54	37.7538	1	0	4	6	0	8	30	18	0	0	0	0
8181.82	5	12.672	233.1	0	2	0	33	22	27.99	0	627.273	679.545	8	0	0	66972.7	101.231	0	0	0	6	0.00142201	4	6	3	0	0	0	0
11818.2	3	12.74	335.69	2	0	4	406	8	21.96	0	720	840	10	1	1	6690	60.0923	0	0	4	5	0	4	24	18	0	0	0	0
12272.7	5	12.089	326.07	0	1	0	246	36	14.04	0	812.727	880.455	33	0	0	16015	23.2	0	0	0	15	0	3	54	36	0	0	0	0
28000	5	23.76	801.61	0	2	5	101	23	13.4345	1	609.091	659.848	18	0	0	77352	80.3385	1	0	45572	11	0	11	26	13	0	0	0	1
1963.64	3	14.49	61.95	0	1	5	233	19	21.7855	0	593.182	692.045	6	0	0	6509	58.3385	0	0	6	2	0	5	6	3	0	0	0	0
5345.45	3	13.739	163.9	1	0	4	342	21	16.9855	0	552.273	690.341	13	1	1	10740	66.8769	1	0	4	7	0	7	25	10	0	0	0	1
19943.2	5	11.997	558.74	1	0	4	304	8	14.5145	0	618.182	721.212	8	0	0	7800	82.6154	1	0	4	6	0	11	11	7	0	0	0	1
12627.3	5	22.825	311.52	0	0	4	394	35	14.2473	1	763.636	954.545	14	0	0	10243.7	20.6538	0	0	4	4	0	3	21	7	0	0	0	1
16000	3	13.99	546.77	0	0	4	797	14	32.73	1	564.545	658.636	10	0	0	12855	50.7231	0	0	4	6	0	6	19	14	0	0	0	0
17727.3	3	8.67	474.7	0	1	4	134	8	2.72	1	640.909	747.727	8	0	0	4498.15	16.7308	0	0	4	3	0	1	11	7	0	0	0	0
27272.7	5	14.069	566.15	0	0	0	235	8	29.4218	0	720	840	9	2	1	23521.8	85.2692	0	0	0	3	0	7	9	5	0	0	0	0
17727.3	3	6.651	465.84	2	0	0	141	13	5.08	0	659.091	823.864	11	1	1	3678.46	22.5	0	0	2	7	0	0	16	9	0	0	0	0
7727.27	3	11.825	277.28	1	0	0	219	21	15.4555	0	560.455	700.568	5	0	0	9430.62	64.1538	0	0	0	4	0	4	6	2	0	0	0	0
5481.82	3	13.33	170.12	0	2	4	146	23	16	2	725.455	785.909	10	1	1	3841.85	32	0	0	4	9	0.00142201	2	17	9	0	0	0	0
15600	3	8.382	445.61	1	2	0	17	13	23.5855	0	668.182	723.864	7	0	0	14771.5	76.1538	0	0	38	2	0	14	16	11	0	0	0	0
30545.5	5	20.339	718.51	0	0	0	51	13	12.2073	0	695	752.917	6	0	0	35234.8	99.1	0	0	0	4	0	2	6	2	5	9496	949.6	0
32727.3	5	19.99	794.65	0	2	0	29	19	3.10909	0	613.636	767.045	9	1	0	11061.1	27.0308	0	0	0	3	0	2	19	16	0	0	0	1
9090.91	3	14.685	338.63	1	2	2	141	13	12.9727	0	600	700	9	1	1	8012.31	57.6923	1	0	5	7	0	0	12	6	3	3534	1060.2	0
23636.4	3	10.989	645.25	2	1	4	263	0	5.69091	0	752.727	940.909	11	0	0	12961.8	90.8077	0	0	4	4	0	7	10	4	1	4127	0	0
4545.45	3	10.439	160.15	0	0	4	555	37	9.46364	0	730.909	852.727	6	0	0	5080	85.5077	1	0	4	3	0	11	8	4	3	1469	146.9	0
26284.1	5	29.689	980.76	1	0	0	195	38	29.5727	0	576.818	672.955	8	0	0	39039	82.4308	0	0	0	5	0	11	9	5	0	0	0	1
17727.3	3	7.139	459.67	0	0	4	395	44	15.96	0	627.273	784.091	15	0	0	20279.5	42.6	1	0	4	13	0	10	24	6	1	6117	611.7	0
3490.91	3	8.349	99.68	1	1	0	171	8	11.04	0	585	731.25	10	1	1	8751.92	31.6615	0	0	0	5	0	2	12	8	3	1202	240.4	0
6000	3	4.788	198.76	0	0	0	260	21	9.07273	0	650	812.5	8	0	0	13186.2	37.0154	0	0	0	3	0	6	14	8	2	3029	908.7	0
28363.6	5	10.323	527.47	2	2	0	167	8	12.8727	0	556.364	695.455	14	2	2	20015.1	54.6462	0	0	0	6	0	4	25	14	0	8379	1675.8	0
5818.18	3	10.99	209.5	1	2	0	324	10	16.1018	4	680	736.667	9	0	0	1470.46	24.2308	0	0	0	4	0	5	20	14	0	0	0	1
6545.45	3	11.53	263.93	0	0	0	246	36	26.37	1	605.455	756.818	20	0	0	5246	14.9538	1	0	0	10	0	10	36	15	1	2014	0	0
13090.9	3	7.89	375.43	1	1	0	19	14	12.5273	4	741.818	803.636	8	0	0	7866.46	63.4154	0	0	0	6	0	5	10	7	3	59	17.7	0
16545.5	3	8.46	441.69	0	1	0	63	14	8.19	0	796.364	995.455	18	0	0	10025.5	11.6308	1	0	0	6	0	3	18	14	0	5822	1164.4	0
20000	3	13.98	683.36	1	1	4	89	3	14.6364	2	725.455	785.909	23	0	0	30879.7	53.7692	1	0	4	18	0	4	42	31	1	3541	354.1	0
1636.36	3	7.282	55.27	1	1	0	211	19	2.10909	0	681.818	738.636	5	0	0	696.923	11.4231	1	0	58342	5.69049	0.00142201	8.4678	14.659	8.09808	3	127	0	0
6545.45	3	12.303	204.11	2	2	5	34	18	40.8109	0	695	868.75	6	0	0	18208.8	89.3077	0	0	6	3	0	3	4	1	0	0	0	1
10625	3	17.919	375.07	0	0	0	594	14	20.75	0	548.182	593.864	11	0	0	11497	61.6615	1	0	206	6	0	29	12	7	3	2892	0	0
4363.64	3	17.919	141.21	1	2	0	17	13	27.3927	0	618.182	669.697	21	0	0	31819.6	101.877	1	0	0	18	0	2	20	12	0	0	0	1
13827.3	3	8.244	372.93	0	1	0	388	3	10.5455	2	670	725.833	5	0	0	11859.1	40.8	0	0	0	2	0	6	5	0	3	893	0	0
3272.73	3	16.173	144.55	1	1	0	660	23	34.1564	0	690	747.5	16	0	0	15154.2	57.4154	0	0	0	10	0	29	35	15	1	1517	0	0
3054.55	3	8.253	89.27	1	1	4	171	8	19.38	0	589.091	736.364	14	0	0	16270	39.9538	0	0	4	7	0	6	17	9	3	1381	276.2	0
9927.27	3	14.3	288.32	0	0	0	621	43	23.5718	0	725.455	906.818	6	0	0	11527	102.346	0	0	70	4	0	20	5	4	3	1337	133.7	0
6545.45	3	15.037	244.93	1	2	0	34	18	11.7182	0	680	850	9	0	0	8251.38	69.7846	0	0	0	5	0	6	16	5	3	1911	573.3	0
20181.8	3	10.439	592.53	0	1	0	27	12	29.5745	0	576.818	672.955	10	0	0	15978.5	42.1846	1	0	0	7	0	4	10	8	3	7092	1418.4	0
10000	3	19.646	360.83	1	0	0	141	13	6.87273	0	758.182	821.364	11	0	0	8839.38	71.3077	0	0	0	9	0	0	17	7	3	2581	258.1	0
9600	3	13.49	325.74	0	2	4	14	11	8.75455	0	631.818	684.47	11	1	0	1926	10.7692	0	0	4	2	0	4	20	7	0	0	0	1
16363.6	3	12.089	589.22	0	1	2	31	2	4.78182	0	659.091	823.864	6	0	0	20118.5	55.7846	0	0	5	3	0	5	6	6	3	1216	364.8	0
5318.18	3	11.997	152.34	1	2	0	124	13	25.68	0	613.636	664.773	3	0	0	141.923	0.861538	0	0	0	2	0	2	3	2	0	0	0	1
24788.6	3	16.99	747.72	1	1	0	17	13	29.07	0	670	725.833	9	1	1	8582.77	54.2308	1	0	0	4	0	9	23	17	3	464	46.4	0
9454.55	3	15.31	278.54	0	0	0	104	23	16.8545	5	670	837.5	14	0	0	7183.38	64.5077	0	0	0	4	0	5	33	19	3	1445	0	0
7090.91	3	11.165	194.03	1	1	5	21	13	22.8327	0	572.727	668.182	18	0	0	22047.7	53.6308	1	0	6	14	0	10	21	15	2	632	0	0
12218.2	3	9.576	364.77	1	2	0	81	15	25.22	0	741.818	927.273	9	0	0	10999.6	80.0308	1	0	0	3	0	11	5	4	1	929	278.7	0
9090.91	3	7.49	311.02	0	0	5	89	3	13.3545	1	780	845	11	0	0	14956.2	34.5231	0	0	6	6	0	3	22	11	2	478	0	0
6000	3	7.51	186.67	2	1	4	29	19	7.91	0	597.273	696.818	11	0	0	16391	47.6	1	0	60383	5.69049	0.00142201	8.4678	14.659	8.09808	2	441	0	0
6545.45	3	8.69	187.75	0	1	0	177	26	4.76	0	720	780	10	0	0	4840.62	69	0	0	38	3	0	13	9	9	0	846	0	0
16363.6	3	14.289	505.34	0	1	0	494	19	10.44	0	725.455	846.364	9	1	1	6078.46	64.6	1	0	0	4	0	6	14	6	0	4903	980.6	0
4090.91	3	11.99	166.05	0	1	0	480	8	9.48182	1	758.182	884.545	8	0	0	3103.38	27.6923	1	0	0	5	0	3	5	5	3	437	131.1	0
14727.3	3	7.11	563.23	0	1	4	52	19	7.04455	0	668.182	835.227	19	0	0	11281.8	25.2	1	0	23471	9	0	1	27	11	3	4832	0	0
14181.8	3	5.852	361.38	1	0	0	134	8	29.4436	0	650.455	704.659	9	0	0	7546.15	16.0462	0	0	0	2	0	16	19	9	1	4652	930.4	0
1090.91	3	10.791	33.21	0	2	0	531	14	34.9745	0	589.091	638.182	7	0	0	2442	28.7	1	1	0	4	0	8	5	1	0	0	0	1
9818.18	3	20.49	336.73	1	2	0	195	38	15.55	0	670	725.833	4	0	0	10997.5	88.8923	1	0	559	5.69049	0.00142201	8.4678	14.659	8.09808	3	1586	0	0
14000	3	5.32	421.61	0	0	2	70	32	30.3055	0	769.091	961.364	12	0	0	29511	76.7846	0	0	5	5	0	3	11	7	1	3606	1081.8	0
8000	3	11.691	269.52	0	0	0	416	19	2.1	0	725.455	846.364	4	1	1	3356.77	45	0	0	0	3	0.00142201	2	14	11	3	2592	0	0
13000	3	15.73	377.56	0	1	0	291	23	12.3727	0	613.636	767.045	7	1	1	4885.85	115.269	1	0	1481	3	0	8	9	6	1	3358	1007.4	0
27272.7	3	7.371	942.73	0	2	0	79	2	17.5336	1	735	857.5	11	0	0	30471	31.0154	1	0	0	5	0	5	15	9	3	8407	2522.1	0
7636.36	3	9.99	225.84	0	2	2	42	26	9.42	0	796.364	862.727	25	0	0	70657.8	23.5846	1	0	5	8	0	12	80	50	3	3324	332.4	0
4090.91	3	17.171	174.83	0	2	0	595	23	8.77273	0	680	793.333	7	0	0	8390.31	66	1	0	0	5	0	2	6	3	3	1054	105.4	0
5454.55	3	12.897	206.03	2	0	0	219	21	17.9818	0	552.273	644.318	13	0	0	7576.62	76.8923	0	0	28	10	0	9	20	17	0	1971	394.2	0
15000	3	7.392	507.37	0	0	5	286	16	9.09818	0	662.727	773.182	7	0	0	2526.46	6.56923	0	1	6	2	0	14	11	7	3	7534	1506.8	0
22250	5	17.56	559.7	0	2	0	188	23	23.2609	0	769.091	833.182	12	0	0	22540	87.4615	1	0	0	7	0	9	9	5	5	3821	0	0
35454.5	5	14.049	723.34	2	2	4	635	3	30.5	0	705	763.75	9	0	0	54058.8	69.9	0	0	4	7	0	3	16	14	4	3354	0	0
5000	3	13.491	173.31	2	2	0	350	9	19.93	0	548.182	639.545	12	0	0	21390	85.2923	0	0	0	7	0	3	9	6	2	1209	0	0
17727.3	3	13.332	499.08	0	1	0	4	3	14.0236	0	631.818	684.47	13	0	0	36726.3	96.1692	1	0	27471	10	0	10	15	9	3	4776	955.2	0
35000	3	14.069	1175.76	1	1	0	17	13	23.1709	0	730	912.5	11	0	0	17127.7	36.5769	0	0	0	7	0	6	11	7	3	12174	1217.4	0
5000	3	8.789	156.66	2	2	3	432	10	24.48	0	760	823.333	4	0	0	8878.15	76.0615	0	0	3	1	0	3	4	3	1	106	10.6	0
10522.7	3	15.31	403.02	0	0	4	32	21	27.9055	0	685	799.167	12	0	0	15661.7	41.2615	1	0	55393	5.69049	0.00142201	8.4678	14.659	8.09808	0	0	0	1
35000	3	14.663	1184.86	1	1	4	51	13	34.4182	0	631.818	789.773	10	0	0	47388.5	89.4231	0	0	4	8	0	6	11	6	3	13459	4037.7	0
19227.3	5	24.49	512.07	0	0	4	113	22	25.5273	0	585	633.75	13	0	0	19632.9	49.9	0	0	4	5	0	6	13	10	2	3695	739	0
4727.27	3	6.291	123.5	1	0	4	74	30	17.8364	1	613.636	715.909	16	0	0	4196	13.3538	0	0	4	8	0	12	32	13	3	1846	184.6	0
38181.8	5	21.989	927.1	0	2	4	414	0	17.0818	0	560.455	607.159	11	0	0	46160.2	95.5231	1	0	4	9	0	4	17	12	0	11190	0	0
13090.9	5	9.93	254.56	2	0	4	275	8	18.5018	0	775	968.75	10	0	0	17495.8	18.4615	0	0	4	2	0	6	14	11	0	3904	0	0
13090.9	3	6.534	495.94	0	2	0	502	7	16.4864	0	807.273	941.818	16	0	0	16788.9	32.5846	0	0	0	5	0	13	9	6	1	6857	685.7	0
10000	3	18.18	372.66	1	0	0	230	2	22.6909	0	670	837.5	6	0	0	5595.69	57.1	0	0	0	2	0	6	4	3	3	2741	0	0
28363.6	3	8.9	762.08	0	2	4	410	8	24.58	0	790.909	922.727	12	0	0	25149.4	70.8923	1	0	4	6	0	10	8	5	0	1605	0	0
10472.7	3	5.32	385.47	2	0	2	301	21	5.5	1	741.818	803.636	11	0	0	16258.3	37	0	0	5	3	0	7	15	9	3	1074	0	0
13738.6	3	12.683	383.52	1	2	5	403	38	15.4964	0	740.909	864.394	7	0	0	1784.46	7.75385	0	0	6	2	0	3	13	5	2	3507	701.4	0
33425	3	11.165	1080.89	1	2	4	136	8	22.32	0	747.273	809.545	19	0	0	40302.5	56.6	1	0	4	6	0	16	30	17	0	14637	2927.4	0
13725	5	20.075	350.4	1	1	0	167	8	26.7055	1	665	775.833	7	0	0	3596.31	23.8	0	0	0	3	0	6	10	6	2	3917	783.4	0
6000	3	11.151	200.41	1	0	0	436	8	8.33727	0	544.091	680.114	7	0	0	4893.46	73.1	0	0	0	6	0	4	10	3	3	2650	265	0
12000	5	11.466	271.45	0	1	0	44	26	15.1282	1	589.091	638.182	31	0	0	32835	51.8769	0	0	0	5	0	24	11	8	4	3350	0	0
12272.7	3	9.423	487.33	0	0	5	215	8	8.89	1	690	862.5	31	0	0	21514.6	22.3846	1	0	6	16	0	19	44	27	3	4081	0	1
2863.64	3	16.61	121.51	0	0	0	480	8	23.8145	2	675	731.25	6	0	0	3992.31	80.1	1	0	0	4	0	1	9	4	2	1613	0	0
19636.4	3	10.99	785.62	0	1	0	466	36	14.53	3	741.818	865.455	15	0	0	29931	62.6	0	0	0	7	0	17	14	6	3	2344	0	0
6363.64	3	7.39	217.4	0	0	2	271	35	16.7318	0	650	812.5	11	0	0	39646.2	87.6	0	0	5	3	0	13	10	7	3	2325	0	0
41363.6	3	15.939	1204.57	0	2	0	120	21	22.2727	0	636.364	742.424	17	0	0	69808.8	53.9077	0	0	0	10	0	7	17	11	3	6315	631.5	0
19636.4	3	7.173	751.75	0	2	0	177	26	12.3091	0	774.545	839.091	13	0	0	283276	102.808	0	0	0	6	0	7	14	9	3	7176	0	0
7272.73	3	14.99	277.29	1	1	0	196	14	14.1818	1	618.182	669.697	8	0	0	2318	48.0308	0	0	0	3	0	6	7	5	3	855	256.5	0
3354.55	3	14.661	108.55	1	2	0	193	13	8.79091	0	564.545	705.682	10	0	0	8184.62	31.3846	1	0	0	9	0.00142201	2	10	9	3	332	33.2	0
909.091	3	15.928	34.42	0	2	5	615	15	20.4727	0	665	775.833	8	0	0	17607.7	76.3	1	0	6	2	0	9	8	2	1	291	87.3	0
18000	5	13.185	519.35	2	2	4	818	43	25.4727	1	665	720.417	16	1	0	17494.6	62.4615	0	0	4	11	0.00142201	10	37	11	5	984	98.4	0
6163.64	3	13.882	189.34	0	2	0	47	17	15.4909	0	780	845	16	0	0	5941.85	21.9	0	0	0	5	0	7	17	11	2	1024	0	1
3272.73	3	13.68	136.09	0	1	0	682	2	29.7	0	613.636	715.909	16	0	0	23836.2	91.2154	1	0	259	9	0	9	14	13	3	80	8	0
9272.73	3	20.405	309.65	2	2	0	410	8	20.3127	0	741.818	803.636	7	0	0	44822.6	90.5692	1	0	0	4	0	5	13	8	2	3843	1152.9	0
17697.7	3	16.489	519.04	1	0	0	37	23	23.3	0	613.636	715.909	9	0	0	17700	85.6154	1	0	0	5	0	5	9	5	0	0	0	0
5072.73	3	12.99	208.88	2	2	0	348	18	21.89	1	665	775.833	11	0	0	2269.85	12.2769	0	0	0	6	0	2	30	18	3	1373	274.6	1
1181.82	3	6.633	30.44	0	0	0	31	2	11.43	0	630	787.5	12	0	0	3204.23	6.57692	1	0	60384	5.69049	0.00142201	8.4678	14.659	8.09808	3	435	0	0
27272.7	5	15.389	581.58	0	1	0	2	2	16.1018	2	544.091	589.432	22	0	0	33948.9	79.5846	0	0	0	11	0	9	46	22	5	8135	0	0
18181.8	3	11.99	664.2	0	2	0	223	12	6.07273	1	670	837.5	7	0	0	12061.5	77.2	0	0	0	3	0	0	15	7	0	0	0	0
17825	5	12.35	399.67	0	2	4	139	8	12.8618	0	568.636	710.795	18	1	1	18460	44.3	0	0	4	13	0	4	29	17	0	0	0	0
9045.45	3	14.289	335.21	1	2	0	184	26	21.5455	0	548.182	593.864	10	1	1	12754.2	59.8846	1	0	0	9	0	1	13	6	0	0	0	1
8000	3	10.323	263.7	1	2	0	118	20	17.8636	0	609.091	659.848	8	1	0	1653.08	50.0769	0	0	0	4	0	11	6	2	0	0	0	0
19636.4	5	13.35	412.79	0	0	0	212	7	22.78	0	680	793.333	7	0	0	11313	47.0769	0	0	0	3	0	9	12	6	0	0	0	0
10909.1	5	11.421	271.14	0	0	2	236	7	25.11	0	812.727	880.455	4	0	0	5726.77	52.0615	1	0	4172	5.69049	0.00142201	8.4678	14.659	8.09808	3	1017	203.4	0
14181.8	3	10.076	382.5	0	0	0	447	30	7.80909	0	600	650	9	1	1	8684.31	45.8077	0	0	0	6	0	4	17	8	0	0	0	0
25000	5	17.568	655.69	1	1	0	73	23	5.6	0	564.545	658.636	14	0	0	54200.8	84.5769	0	0	0	10	0	6	16	14	4	10676	3202.8	0
10909.1	3	8.253	318.79	1	2	0	342	21	28.3364	0	556.364	695.455	9	0	0	272955	87.6923	0	0	0	7	0.00142201	7	18	10	3	2477	495.4	0
17727.3	5	17.127	389.36	1	1	0	164	20	23.25	0	568.636	616.023	13	0	0	16488.8	67.6308	0	0	0	9	0	6	13	6	2	6936	1387.2	0
16929.5	5	26.389	412.02	2	1	0	245	26	12.5018	0	600	650	6	1	0	5088	46.5231	1	0	0	3	0	1	9	8	4	6041	604.1	0
15363.6	3	12.591	444.25	1	1	0	134	8	12.3927	0	747.273	934.091	7	0	0	12175.7	75.4615	1	0	307	5.69049	0.00142201	8.4678	14.659	8.09808	1	2208	220.8	0
1418.18	3	18.799	42.84	1	0	5	470	18	29.5909	1	695	752.917	12	0	0	8480.77	36.6	1	0	6	6	0	10	15	5	0	0	0	1
34581.8	5	21.99	875.34	0	2	3	301	21	32.2445	1	763.636	827.273	16	0	0	17453.1	48.5	0	0	3	8	0	21	13	6	0	0	0	0
15363.6	5	17.545	315.79	0	2	0	5	4	15.6364	0	560.455	607.159	15	0	0	14393.1	78.4	1	0	38	5.69049	0.00142201	8.4678	14.659	8.09808	0	0	0	0
8500	3	14.418	298.92	0	0	5	196	14	16.5455	0	675	843.75	19	0	0	25155.8	36.2769	0	0	6	7	0	19	14	11	2	386	115.8	0
19500	5	13.869	514.93	0	0	2	91	7	18.4364	1	544.091	634.773	10	2	0	3877	17.5385	0	0	5	6	0	1	9	5	0	0	0	0
4970.45	3	16.489	210.57	1	1	0	70	32	26.8036	0	560.455	653.864	9	0	0	8192.15	76.8	1	0	0	6	0	3	11	3	3	1776	0	1
8727.27	3	11.799	323.98	1	2	0	32	21	7.80909	0	576.818	721.023	8	0	0	5002	53.2	1	0	21319	6	0	1	8	5	3	2038	0	0
19636.4	5	13.014	423.14	0	2	0	233	19	17.1736	0	740	925	15	0	0	49248	51.9692	0	0	0	7	0	10	14	5	4	4709	1412.7	0
7000	3	10.791	232.47	0	0	9	286	16	9.76364	4	604.545	705.303	11	1	1	4349	30.0462	1	0	10	7	0	1	19	10	2	1741	0	0
10636.4	3	21.06	350.27	2	0	0	491	30	16.4782	0	660	770	26	0	0	31041.9	92.4231	0	0	0	22	0	4	28	13	3	2156	215.6	1
4545.45	3	12.089	163.67	1	0	5	33	22	16.5818	1	736.364	920.455	7	0	0	29240	64.1538	1	0	6	2	0	12	11	8	3	130	13	0
14400	3	5.852	433.66	0	0	0	454	41	13.29	0	774.545	839.091	12	0	0	9796.62	32.4	0	0	2	3	0	18	14	8	1	463	92.6	0
9327.27	5	14.661	278.99	1	1	0	99	8	13.06	0	604.545	755.682	9	1	1	6135.69	32.8615	0	0	0	6	0	10	27	16	0	0	0	0
7272.73	3	9.67	256.9	1	0	4	33	22	14.8691	0	560.455	607.159	20	0	0	7745.77	34.7308	1	0	4	3	0	9	12	5	2	1546	0	1
27272.7	5	9.81	650.78	1	2	0	263	0	18.46	0	745	869.167	12	1	1	6592.62	12.0923	0	0	0	5	0	25	15	12	1	3268	980.4	0
13236.4	3	15.389	382.74	1	2	0	35	14	36.5345	0	730.909	791.818	10	0	0	8246	50.0769	1	0	38	5.69049	0.00142201	8.4678	14.659	8.09808	3	4144	828.8	0
9090.91	3	17.754	352.27	0	2	5	45	21	17.1273	0	741.818	865.455	11	1	1	4526.31	28.7308	0	0	6	2	0	9	14	6	2	2844	0	0
32275	3	19.773	1232.1	0	2	0	74	30	42.36	0	613.636	715.909	14	0	0	49622.3	79	1	0	0	9	0.00142201	16	26	13	0	0	0	0
3000	3	20.075	108.84	1	0	5	275	8	16.8873	0	640.909	694.318	19	0	0	806.538	14	1	0	6	2	0	27	12	7	2	1402	420.6	1
38181.8	5	19.646	886.11	0	2	4	300	9	16.18	0	580.909	726.136	14	0	0	48597.2	69.7846	0	0	4	10	0	0	22	6	1	4116	1234.8	0
14400	3	9.702	430.78	1	1	0	341	14	20.03	1	600	700	9	0	0	39463.4	79.7538	1	0	0	6	0	14	11	5	3	2632	789.6	0
18545.5	3	9.99	548.47	1	0	0	4	3	16.5682	0	705	881.25	13	0	0	20686.6	57.4154	0	0	0	6	0	7	23	10	0	5509	1652.7	0
20454.5	5	12.49	562.33	0	1	0	145	8	23.5418	0	790.909	856.818	13	0	0	7794.23	72.6923	1	0	0	2	0	12	9	4	2	10177	3053.1	0
6115.91	3	19.646	269.72	1	0	3	33	22	3.59	0	758.182	947.727	9	0	0	2628.77	33.1154	0	0	3	2	0	6	4	2	0	3410	0	1
11818.2	3	9.17	414.43	0	1	0	102	26	18.8727	0	660	770	10	1	1	6979	62.1385	0	0	0	5	0	7	19	8	3	1820	546	0
2272.73	3	10.923	80.59	2	2	0	855	40	8.16	0	713.636	773.106	2	0	0	470.769	8.83077	0	0	0	1	0	11	13	9	0	1007	0	0
8727.27	3	8.253	255.04	1	2	0	242	8	20.73	0	650	704.167	12	0	0	11616.9	38.5846	0	0	0	6	0	8	21	11	0	1106	0	0
23636.4	3	11.151	668.02	0	1	0	38	21	9.31	0	741.818	865.455	9	0	0	18822.5	68.4	0	0	0	6	0	13	9	8	3	6564	1312.8	0
15000	3	12.089	491.01	0	2	0	4	3	18.94	0	560.455	607.159	19	0	0	35049.5	75.5077	1	0	0	10	0	8	30	19	0	225	45	0
3636.36	3	7.26	123.99	1	1	2	55	29	20.0509	0	618.182	721.212	31	2	2	5397	31.6	1	0	5	6	0	26	11	7	2	1788	357.6	1
31818.2	5	17.127	908.5	0	2	0	218	0	23.5545	0	741.818	865.455	24	0	0	50611.2	63	0	0	0	15	0	16	24	17	5	13533	0	0
15545.5	5	18.54	439.27	1	1	5	242	8	13.88	1	680	736.667	18	0	0	10121.5	64.7231	0	0	6	8	0	23	13	9	5	3999	1199.7	0
21000	5	12.88	476.53	1	0	0	484	21	16.45	1	710	828.333	6	1	1	776.308	13.8462	0	0	0	3	0	4	4	3	3	2736	820.8	0
7090.91	3	14.839	203.59	1	1	5	157	8	16.9282	0	556.364	695.455	9	0	0	16413.4	81.6308	0	0	6	6	0	4	9	5	2	1384	138.4	0
16000	3	9.17	510.07	1	0	4	57	9	34.1564	0	593.182	741.477	18	0	0	17222.2	58.3692	0	0	4	4	0	26	22	10	0	4038	403.8	0
7300	3	12.254	239.48	1	0	6	398	2	2.20091	0	763.636	890.909	8	0	0	2781.23	25.3	1	0	7	3	0	2	15	9	3	2548	0	0
28363.6	3	19.327	862.49	0	1	0	91	7	15.2918	0	690	747.5	17	0	0	15040.6	55.6615	0	0	0	12	0	6	17	11	0	4364	0	0
6136.36	3	8.679	234.65	0	0	2	235	8	16.9455	0	670	781.667	11	0	0	14400	67.2	0	0	5	8	0	1	19	9	3	2005	0	0
10784.1	3	8.496	292.05	1	1	4	300	9	2.71636	0	700	758.333	3	0	0	6163.23	30.8	0	0	4	2	0	2	19	17	0	0	0	0
13454.5	5	15.99	359.83	0	2	0	328	3	22.39	0	613.636	715.909	8	1	1	3126	24.2769	0	1	0	2	0	9	5	4	1	2306	461.2	0
3959.09	3	5.32	100.89	0	0	4	432	10	20.8718	0	735	918.75	15	0	0	9035.08	22.6	0	0	4	6	0	3	15	10	0	781	156.2	1
27772.7	5	11.421	530.98	2	0	4	664	39	20.17	0	560.455	653.864	13	0	0	29706.9	68.8	0	0	4	4	0	14	14	7	0	0	0	0
11818.2	3	17.57	359.38	0	1	5	324	10	5.95	0	720	900	8	0	0	4025	73.4462	1	0	6	3	0	9	3	2	3	1293	0	0
5454.55	3	12.089	196.41	0	1	4	480	8	22.96	0	660	715	9	1	1	5525.77	62.8923	0	0	4	7	0	9	8	6	0	0	0	0
17727.3	3	10.384	480.08	0	1	0	129	30	25.8382	0	560.455	653.864	14	0	0	19112.2	40.0615	0	1	0	9	0	5	11	8	3	961	288.3	0
9090.91	3	17.589	351.53	1	2	0	741	13	12.2909	0	705	881.25	8	0	0	9751.54	60.3462	0	0	0	5	0	1	9	7	3	534	160.2	0
10909.1	3	11.539	389.98	1	2	0	436	8	5.8	0	589.091	638.182	16	1	1	5994.23	10.5231	0	0	0	8	0	9	21	15	3	4906	1471.8	0
17272.7	5	14.069	430.27	0	0	4	124	13	7.96909	0	617.727	720.682	7	0	0	16968.5	37.6615	0	0	4	4	0	5	12	8	0	0	0	0
38181.8	5	11.466	791.71	0	0	0	140	8	27.7527	1	741.818	865.455	17	0	0	5350.38	14.6538	0	0	0	9	0	31	18	7	0	0	0	0
4090.91	3	14.3	171.62	0	1	5	195	38	15.6545	0	700	816.667	14	0	0	5258	32.1	1	0	71	8	0	2	16	5	0	0	0	0
38231.8	5	24.695	901.77	1	2	4	240	21	24.17	0	618.182	772.727	9	0	0	28455.5	81.6308	1	0	307	5.69049	0.00142201	8.4678	14.659	8.09808	0	0	0	0
4090.91	3	7.601	154.18	0	1	2	578	39	11.6182	0	785.455	916.364	7	0	0	9350.77	67.9	1	0	11735	5.69049	0.00142201	8.4678	14.659	8.09808	2	259	51.8	0
11454.5	3	13.014	481.63	2	1	0	54	28	40.7455	0	736.364	920.455	10	0	0	13948	72.7385	0	0	0	4	0	6	9	7	0	6552	1310.4	0
13000	5	26.488	374.59	0	2	4	773	0	11.5745	1	660	770	13	1	0	14747.3	47.3	0	0	4	7	0	3	20	13	5	2673	267.3	0
4336.36	3	12.177	179.94	0	1	4	291	23	26.18	0	613.636	715.909	12	0	0	17644.6	64.6154	1	0	4	8	0	4	23	9	3	359	0	1
6500	3	12.99	218.98	0	1	2	519	9	17.3536	1	589.091	736.364	9	0	0	115382	92.5846	1	0	5	2	0	9	17	5	1	1968	590.4	0
19636.4	3	15.813	862.49	0	1	2	286	16	4.16455	0	622.727	778.409	8	0	0	9165.69	52.7077	0	0	5	3	0	1	10	4	3	5890	589	0
7740.91	3	17.57	235.39	0	1	2	193	13	0.972727	1	604.545	755.682	17	0	0	1043.08	52.1538	1	0	5	1	0	21	2	2	3	2300	230	0
18136.4	3	33.869	712.98	1	1	0	345	20	34.2545	1	725.455	785.909	14	0	0	25119.2	65.6538	0	0	0	9	0	2	17	6	0	0	0	1
7000	3	14.663	260.67	0	2	0	493	42	14.4327	0	665	775.833	7	2	1	3359.08	49.6462	0	0	0	4	0	6	8	4	3	1961	0	0
20945.5	5	11.99	427	0	0	2	27	12	2.64	0	769.091	897.273	22	0	0	5300.77	60.4	1	0	5	5	0	25	13	12	1	1402	280.4	1
10636.4	5	14.949	269.76	1	2	0	95	13	30.2	0	585	633.75	11	0	0	29004.2	71.0769	0	0	0	9	0.00142201	2	15	11	0	0	0	0
18000	3	14.069	554.29	1	0	0	479	8	13.8909	0	600	750	13	0	0	11705.5	77.1077	0	0	0	9	0	6	12	7	0	5221	1566.3	0
16338.6	3	14.46	475.61	2	1	0	19	14	4.3	0	730.909	852.727	9	0	0	6249.38	62.5385	0	0	0	4	0	8	12	7	0	0	0	0
18000	3	6.62	675.49	0	2	4	471	42	21.9927	0	745	807.083	15	0	0	19288	29.2615	0	0	4	7	0	8	22	14	2	5134	513.4	0
30000	3	13.491	1039.82	0	1	5	225	18	7.26545	0	556.364	602.727	10	0	0	35461	86.8846	1	0	6	6	0	5	17	7	3	8656	1731.2	0
6027.27	3	17.991	189.51	1	2	0	280	9	10.85	0	670	837.5	5	0	0	6839	84.9231	1	0	0	5	0.00142201	0	8	4	3	1104	110.4	0
18181.8	5	17.82	488.49	0	2	0	31	2	14.8909	0	796.364	929.091	15	0	0	27284.3	44.8615	0	0	27564	6	0	6	29	20	0	0	0	0
20000	5	12.294	461.85	0	2	0	45	21	31.4618	0	654.545	763.636	15	0	0	18300	46.2	0	0	0	8	0	10	16	8	1	600	60	0
21818.2	3	7.348	614.62	0	1	0	505	10	13	0	613.636	767.045	12	0	0	11147	38.6769	0	0	0	7	0	9	14	10	2	9451	1890.2	0
38181.8	5	16.02	851.51	0	2	0	195	38	13.62	0	617.727	772.159	12	0	0	24116.3	50.4	1	0	1391	5.69049	0.00142201	8.4678	14.659	8.09808	0	0	0	0
12272.7	3	8.69	469.36	1	0	4	309	30	18.66	0	593.182	692.045	18	0	0	14200.6	51.1154	1	0	21985	7	0	16	18	8	3	6010	1202	0
36363.6	3	8.085	1241.5	0	0	0	79	2	10.52	0	730	912.5	13	1	1	10439	27.1154	0	0	0	4	0	17	14	12	3	7130	0	0
28000	5	17.86	708.89	0	2	0	484	21	12.15	0	705	822.5	18	0	0	19416.9	42.1	0	0	0	12	0	15	18	11	5	6356	635.6	0
3054.55	3	10.582	89.85	1	0	4	242	8	12.3	0	568.636	710.795	7	0	0	7686	72.3692	1	0	10468	5.69049	0.00142201	8.4678	14.659	8.09808	0	450	45	0
41363.6	3	11.99	1162.34	2	2	4	185	3	12.3709	0	780	845	19	0	0	77252.3	46.7385	0	0	4	10	0	4	38	27	2	7558	0	0
13090.9	3	10.296	395.37	1	1	0	79	2	8.93636	0	640.909	747.727	6	0	0	6598.31	27.4154	1	0	0	2	0	3	9	4	2	3698	1109.4	0
10909.1	3	11.14	328.06	0	0	0	209	21	19.8	0	780	975	10	0	0	26079.2	67.9385	1	0	49112	7	0	9	11	8	3	64	6.4	0
12000	5	10.377	264.1	2	2	0	304	8	28.37	0	752.727	815.455	16	0	0	22593	65.7	1	0	0	8	0	5	21	14	0	0	0	1
4000	3	11.061	133.42	0	2	0	367	45	31.4073	2	622.727	778.409	14	0	0	7731.23	67.8462	0	0	0	6	0	7	21	10	3	1554	0	0
35000	5	8.541	734.9	1	2	4	49	12	4.7	0	785.455	981.818	4	0	0	25820	54.1846	0	0	4	3	0	2	3	2	4	7876	2362.8	0
18000	5	9.229	368.35	0	0	4	120	21	5.4	1	636.364	742.424	5	0	0	7830	87.6923	0	0	4	2	0	4	5	3	0	0	0	0
26590.9	5	12.29	727.72	1	1	4	208	28	16.2982	0	650	758.333	5	0	0	47723.8	61.0154	0	0	4	3	0	5	5	5	1	4035	807	0
16363.6	5	13.032	423.33	1	0	1	503	8	24.1636	0	659.091	714.015	18	0	0	20763.7	35.5	0	0	1	9	0	15	21	11	0	5834	1166.8	0
26181.8	5	19.877	481.93	0	2	0	176	3	12.9182	0	663.636	829.545	13	0	0	33594	77.5385	1	0	1692	5.69049	0.00142201	8.4678	14.659	8.09808	1	5106	510.6	0
12000	3	7.337	338	1	1	5	136	8	18.14	0	709.091	768.182	21	0	0	16882.9	10.7077	0	0	6	4	0	20	20	18	3	1202	120.2	0
9545.45	5	14.31	246.01	1	1	4	55	29	34.14	2	572.727	668.182	8	0	0	1802	83.1692	0	0	4	1	0	18	8	3	0	0	0	0
26000	3	20.955	806.99	1	2	0	683	48	36.9491	0	675	787.5	11	0	0	8121.08	90.9	0	0	50515	4	0	18	15	9	0	5346	0	0
5236.36	3	11.99	159.41	0	2	2	324	10	13.77	0	572.727	620.455	9	0	0	0	0	0	0	5	0	0	3	9	5	0	1648	0	0
12272.7	5	13.18	342.68	0	0	4	480	8	18.1145	0	589.091	736.364	10	0	0	1945.85	6.6	0	0	4	2	0	25	16	2	1	6895	0	0
13090.9	3	5.32	361.38	0	0	0	110	13	5.9	0	589.091	736.364	12	0	0	22564.8	65.8	0	0	0	3	0	8	8	6	0	2111	0	0
16350	3	11.061	545.33	0	0	0	9	7	31.4018	0	654.545	709.091	10	0	0	5268.31	41.4462	0	0	0	3	0	16	7	4	1	1504	451.2	0
8181.82	3	11.592	336.37	1	1	0	227	35	26.37	0	670	725.833	12	0	0	15815.1	83.1385	0	0	0	7	0	12	23	9	2	4336	867.2	0
23636.4	5	19.05	519.37	1	1	4	17	13	7.69	2	752.727	878.182	9	0	0	40896.9	94.2692	1	0	54857	3	0	7	10	10	0	0	0	0
16363.6	5	10.49	386.81	0	0	0	505	10	12.2182	0	640.909	801.136	8	0	0	1836	16	1	0	0	3	0	11	13	4	0	0	0	0
5454.55	3	9.144	161.72	0	1	0	56	8	13.3545	0	747.273	934.091	7	0	0	14784	59.6308	1	0	95	3	0	8	8	5	0	0	0	0
13636.4	3	7.371	471.37	0	0	0	112	23	14.3545	0	801.818	1002.27	16	0	0	13219.4	10.7077	0	0	0	6	0	7	17	14	1	1873	0	0
11818.2	3	16.99	356.48	1	2	0	29	19	16.4945	0	600	700	4	0	0	3162.46	112.962	1	0	0	2	0	6	2	2	1	1347	269.4	0
21818.2	5	18.997	599.96	0	2	0	324	10	28.4618	0	680	850	36	0	0	38017.5	39.4154	0	0	0	13	0	9	34	18	0	0	0	1
5454.55	3	12.35	200.3	1	0	0	107	30	15.4818	0	705	881.25	11	0	0	16975.4	91	0	0	32431	3	0	6	23	16	0	0	0	0
21818.2	5	14.031	482.02	0	0	0	106	12	25.6582	0	710	887.5	19	1	0	20751	55.5	1	0	0	7	0	2	22	8	0	0	0	0
10000	3	11.241	367.94	1	0	4	639	37	20.5364	2	544.091	634.773	13	0	0	24295.4	62.8615	0	0	4	7	1	11	12	9	0	0	0	0
10000	3	9.229	315.17	0	0	4	561	35	15.8809	0	548.182	685.227	9	0	0	9572	88.8462	0	0	4	6	0.00142201	10	7	6	0	0	0	0
9675	3	13.67	402.26	0	1	4	134	8	17.2636	0	695	810.833	10	0	0	18794	86.4769	0	0	4	5	0	1	16	10	0	0	0	0
26181.8	3	7.26	743.91	1	2	0	54	28	16.27	0	700	758.333	8	0	0	18305.8	68.7	0	0	0	4	0	17	7	3	0	0	0	0
6545.45	3	13.35	270.91	0	2	0	86	35	3.89	0	645.455	753.03	3	0	0	6464.31	98.5385	1	0	0	2	0	1	6	4	0	0	0	0
10909.1	3	7.551	378.2	1	0	4	31	2	22.4273	0	613.636	767.045	10	0	0	25225.8	83.1692	1	0	4	3	0	21	20	13	0	0	0	0
47272.7	5	11.462	858.18	0	2	4	177	26	32.28	0	829.091	967.273	24	0	0	24355	23.7231	0	0	4	13	0	20	29	15	0	0	0	0
18545.5	3	10.49	552.47	0	0	0	707	11	18.3055	0	710	769.167	13	0	0	45467.7	82.3846	0	0	0	5	0	6	16	7	0	0	0	0
13000	3	11.99	365.31	1	0	4	111	8	27.41	0	747.273	871.818	8	0	0	9413	32.7	0	0	4	5	0	3	10	8	0	0	0	0
15709.1	3	14.09	657.06	0	2	0	521	24	21.34	0	544.091	634.773	11	0	0	25461	78.0923	1	0	40	7	0	15	14	9	0	0	0	0
22727.3	3	8.991	806.57	0	0	0	32	21	10.7427	0	668.182	779.545	25	0	0	19250.8	27.2	0	0	0	8	0	16	14	12	0	0	0	0
1186.36	3	12.141	49.2	1	1	0	364	23	19.0064	0	548.182	685.227	8	1	1	5528.92	63	0	0	0	7	0	1	7	2	0	0	0	1
9454.55	3	12.39	267.21	1	0	0	240	21	13.3636	1	609.091	659.848	12	0	0	6900.92	33.4615	0	0	0	3	0	18	11	7	0	0	0	0
9070.45	3	16.29	270.94	0	2	0	91	7	30.0636	0	680	793.333	7	0	0	6099.23	80.0308	1	0	0	3	0	9	9	5	0	0	0	0
14545.5	3	10.791	531.36	1	1	0	275	8	18.2	0	665	775.833	13	1	1	18861	73.2692	1	0	0	7	0	4	12	5	0	0	0	0
30545.5	3	10.439	896.8	0	1	5	125	9	30.38	1	618.182	721.212	13	0	0	42946	65.8154	1	0	6	6	0	17	13	5	0	0	0	0
14850	3	20.75	681.48	0	0	0	22	16	32.4218	0	665	775.833	10	0	0	16413.5	88.5231	0	0	0	4	0	11	7	5	0	0	0	0
13090.9	3	10.99	392.81	1	0	0	215	8	17.13	0	580.909	677.727	7	0	0	14195.8	39.9692	1	0	0	5	0	3	8	5	0	0	0	0
3636.36	3	11.99	132.84	0	1	5	263	0	18.41	0	672.727	840.909	6	0	0	22883	86.4769	0	0	6	3	0	6	6	4	0	0	0	0
2727.27	3	8.998	94.26	0	2	2	91	7	7.21636	3	556.364	602.727	32	0	0	32431	55.9385	1	0	5	16	0	2	47	16	0	0	0	1
39709.1	3	15.31	1169.87	0	2	0	617	9	28.0964	0	752.727	878.182	20	0	0	52055.2	75.3846	0	0	0	11	0.00142201	24	30	12	0	0	0	0
12000	3	8.991	354.89	1	0	0	31	2	26.7382	1	540	675	18	0	0	17500.4	65.0769	0	0	0	11	0	4	19	7	0	0	0	1
10909.1	3	5.841	306.45	0	0	0	129	30	8.67273	0	576.818	672.955	8	0	0	12195.1	22.4	0	0	0	4	0	7	19	14	0	0	0	0
10909.1	3	8.991	322.63	0	2	4	188	23	20.8145	2	645.455	806.818	10	0	0	13082	70.2462	1	0	31245	3	0	6	9	7	0	0	0	0
8181.82	3	17.27	357.88	1	2	5	171	8	15.33	0	631.818	684.47	6	0	0	1774	21.9231	1	0	6	2	0	4	8	2	0	0	0	0
27272.7	5	17.589	607.82	0	2	0	362	35	20.9182	0	710	887.5	9	0	0	14530	44.5846	0	0	0	4	0	20	12	6	0	0	0	0
23636.4	5	17.27	499.96	0	1	4	588	4	9.48	0	741.818	803.636	7	1	1	8004.92	72.9077	1	0	7373	3	0	1	6	3	0	0	0	0
10000	3	7.551	315.17	1	1	4	484	21	16.16	1	752.727	878.182	28	0	0	12764.8	49.6462	0	0	4	7	0	21	15	5	0	0	0	1
14181.8	3	6.39	367.19	1	0	4	129	30	29.0073	0	725.455	785.909	24	0	0	38340	61.8462	0	0	4	8	0	26	12	10	0	0	0	0
26727.3	5	9.44	513.83	1	0	3	56	8	14.9727	0	695.455	811.364	27	0	0	10086.5	19.1538	0	0	3	2	0	25	16	7	0	0	0	1
21818.2	5	13.66	461.85	0	1	0	23	9	19.1945	0	665	831.25	14	0	0	28820.6	80.4231	0	0	0	12	0	10	20	12	5	7551	1510.2	0
5000	3	10.791	166.05	1	0	0	209	21	10.4155	1	552.273	644.318	9	1	1	3144	32.1	0	0	0	4	0	16	17	11	1	1575	0	1
18181.8	5	7.101	404.48	0	0	4	477	7	9.03273	0	775	968.75	12	0	0	28086.2	26.6538	1	0	4	5	0	12	13	10	1	8016	2404.8	0
16363.6	3	7.416	628.95	0	0	3	108	21	25.37	0	564.545	705.682	36	0	0	32320	29.7692	0	0	3	22	0	6	44	21	1	8332	833.2	1
16363.6	5	9.99	382.36	0	0	4	160	4	6.88	1	572.727	715.909	11	0	0	15472.6	109.846	0	0	4	2	0	27	6	5	1	2212	221.2	0
16545.5	3	17.748	518.3	0	2	0	324	10	15.1818	0	725.455	906.818	12	0	0	17814.2	58.6154	1	0	33	7	0	10	16	8	3	5172	0	0
8181.82	3	7.101	312.86	0	0	4	812	14	10.6773	0	660	825	7	1	1	9963	85.9	0	0	4	5	0	3	5	2	3	2482	744.6	0
13090.9	5	19.327	402.57	0	1	0	113	22	14.0545	0	544.091	589.432	13	0	0	9517.85	66.8308	0	0	0	6	0	13	12	10	0	0	0	0
17454.5	5	17.298	416.99	0	2	0	36	13	11.0127	0	680	850	13	0	0	17717.3	85.9615	1	0	57629	5.69049	0.00142201	8.4678	14.659	8.09808	0	0	0	0
20000	5	18.205	492.23	1	2	5	48	10	5.62	0	660	770	7	1	1	42	0.346154	0	0	6	4	0	2	25	19	0	0	0	0
20000	3	13.739	668.98	0	1	0	517	14	18.49	0	618.182	772.727	11	0	0	15962	76.0308	1	0	0	5	0	8	15	11	3	7821	1564.2	0
42545.5	5	13.59	830.03	1	1	5	138	0	13.84	0	745	931.25	10	0	0	8365.85	30.0462	0	1	6	4	0	23	13	7	0	0	0	0
12475	3	8.937	402.13	1	0	4	277	8	13.8218	0	668.182	779.545	7	0	0	7826	59.8846	0	0	4	2	0	9	4	2	3	3521	704.2	0
15454.5	3	15.488	581.69	1	0	3	222	12	10.4291	0	675	787.5	8	0	0	12520.3	74.9538	0	0	3	5	0	1	7	3	0	7650	765	0
8727.27	3	12.79	268.75	1	2	0	31	2	1.62727	0	785	981.25	5	0	0	423.692	9.57692	0	0	0	2	0	4	10	6	0	3589	717.8	0
19084.1	5	15.8	564.75	1	2	0	141	13	14.0318	0	631.818	789.773	12	0	0	31241.5	41.9	0	0	38	10	0	2	19	13	0	214	21.4	0
6136.36	3	13.959	251.59	2	1	0	425	44	29.14	0	665	720.417	10	0	0	29742	78.7231	1	0	0	6	0	3	13	3	3	134	0	1
13090.9	3	17.622	422.01	1	0	0	248	11	16.4209	0	665	720.417	13	0	0	3996	40.4923	0	0	0	4	0	10	16	7	0	0	0	0
20454.5	5	13.882	563.98	1	0	2	171	8	19.87	0	735	918.75	7	0	0	11897.3	65.3692	0	0	5	3	0	4	6	4	0	0	0	0
7000	3	19.327	251.56	0	0	0	106	12	24.18	1	604.545	755.682	9	0	0	16858.8	81.2308	1	0	0	3	0	24	22	13	0	0	0	0
11818.2	3	9.819	326.97	1	1	5	286	16	25.56	0	680	793.333	10	0	0	14717.3	36.5538	0	0	6	6	0	9	8	2	0	0	0	0
10227.3	3	7.139	383.06	1	0	0	408	14	10.53	0	769.091	897.273	41	0	0	11951.5	50.8846	0	0	0	5	0	64	18	10	3	3603	1080.9	1
12272.7	3	13.739	501.74	0	2	0	109	21	7.54	0	613.636	664.773	8	0	0	3953.38	13.3538	0	0	0	3	0	1	10	5	3	5968	1193.6	0
11818.2	5	26.24	391.08	1	0	0	22	16	22	0	686.364	800.758	10	0	0	13926.8	30.1846	0	0	0	5	0	5	21	11	3	934	0	1
32727.3	3	8.81	1268.46	1	2	1	242	8	37.9273	0	755	817.917	10	0	0	0	0	0	1	1	0	0	10	8	5	1	5446	0	0
6300	3	9.79	244.5	1	0	0	44	26	10.66	0	580.909	726.136	13	0	0	11476	30.6	0	0	7615	5	0	13	18	14	3	1448	434.4	0
41363.6	3	7.931	1084.07	2	0	4	317	36	10.3273	1	720	900	42	0	0	83580	12.5769	0	0	4	7	0	24	34	22	2	12943	1294.3	0
23636.4	5	14.85	474.23	0	1	5	304	8	13.6	5	560.455	700.568	13	0	0	12957	62.3	1	0	6	3	0	21	16	8	0	0	0	0
13990.9	3	19.99	635.42	1	1	0	177	26	18.2509	0	675	843.75	9	0	0	35104.5	73.3	0	0	0	7	0	13	21	19	0	0	0	0
28636.4	3	29.49	1476.05	0	2	4	134	8	22.1455	0	568.636	663.409	9	0	0	33948.9	55.4	1	0	4	4	0	7	16	12	0	7623	762.3	0
28636.4	5	13.629	785.48	0	1	0	161	14	13.5727	0	722.727	782.955	12	0	0	13492.8	24.3462	1	0	0	3	0	5	20	9	4	5706	0	0
28000	5	12.089	608.65	0	2	0	68	15	17.5727	0	829.091	967.273	5	0	0	35830	16.5846	0	0	0	3	0	6	7	7	0	6107	1832.1	0
14181.8	5	22.429	320.54	0	2	0	277	8	4.86	0	568.636	663.409	10	0	0	15735	28.6154	0	0	0	9	0.00142201	6	11	2	5	4680	936	0
36000	3	9.891	1080.23	1	2	4	255	9	15.6109	0	585	731.25	15	0	0	39899	49.6154	1	0	4	12	0.00142201	12	22	12	2	1531	153.1	0
8000	3	6.228	246.73	1	1	0	549	8	10.2182	0	544.091	680.114	8	1	1	5627.31	40.7308	0	0	0	4	0	4	15	7	3	3165	949.5	0
4795.45	3	10.725	169.6	0	0	2	324	10	15.8073	0	654.545	818.182	4	0	0	0	0	0	0	5	0	0	1	7	4	1	1146	114.6	0
3272.73	3	9.99	116.15	1	2	0	163	21	25.6636	0	710	887.5	9	0	0	2538.46	34.8923	0	0	0	5	0	2	8	6	0	0	0	0
25022.7	5	17.091	713.87	0	1	0	111	8	21.0727	0	774.545	968.182	20	0	0	26147.3	70	1	0	0	15	0	14	24	15	2	3496	1048.8	1
11372.7	5	23.298	283.09	0	2	0	309	30	2.93636	0	544.091	680.114	8	1	1	5628	63.6923	0	0	0	5	0	0	11	10	1	3438	687.6	0
10909.1	3	9.17	318.79	0	1	2	25	13	8.85455	0	580.909	677.727	21	0	0	6738.31	25.9615	1	0	5	6	0	23	8	7	2	4809	480.9	0
8000	3	13.99	273.39	0	2	0	82	34	20.96	0	556.364	649.091	12	1	1	15057.5	38.4923	1	0	0	6	0	5	11	4	2	3821	764.2	0
4090.91	3	9.229	157.59	1	2	4	32	21	3.72727	0	609.091	761.364	7	0	0	117.692	0.553846	0	0	4	2	0	0	7	3	1	111	33.3	1
11454.5	3	7.101	438	1	2	0	311	2	16.7455	0	752.727	815.455	6	1	1	7130.31	78	0	0	0	4	0	12	6	3	3	117	0	0
10000	3	5.958	307.04	1	2	4	260	21	17.5455	0	765	892.5	14	0	0	14782.2	12.4	0	0	4	14	0	1	20	18	0	0	0	1
41363.6	5	22.22	931.19	1	1	0	268	8	10.1891	0	705	763.75	3	0	0	52140.9	90.1	1	0	0	3	0	2	9	6	3	11500	2300	0
10909.1	3	10.384	320.05	0	0	4	518	1	34.29	0	769.091	833.182	10	0	0	9541.15	39.9	0	0	4	1	0	24	5	3	3	3972	0	0
12000	3	8.703	385.35	0	2	4	99	8	20.1364	0	735	857.5	9	0	0	12782.8	63.2154	1	0	100	2	0	7	11	6	3	5069	1013.8	0
21000	5	16.115	495.74	0	2	0	249	36	13.5	0	704.545	821.97	14	0	0	1555.38	6.69231	0	0	0	4	0	3	22	7	0	0	0	0
23563.6	3	7.139	661.93	1	1	4	208	28	15.0382	1	780	910	5	0	0	15435.5	41.6769	1	0	4	1	0	8	5	5	0	5335	0	0
19090.9	3	5.32	632.42	0	2	4	176	3	13.6145	1	636.364	689.394	16	0	0	76222.2	51.9231	0	0	4	11	0.00142201	9	26	16	3	9829	2948.7	0
9000	3	25.88	362.05	1	2	0	99	8	37.2273	0	544.091	634.773	21	0	0	25589.8	77.1077	1	0	0	17	0	1	24	12	0	4284	1285.2	1
4909.09	3	10.47	194.93	0	0	2	251	8	11.1709	0	564.545	658.636	16	1	1	19059.4	31.8462	1	0	5	12	0	5	15	10	0	598	179.4	0
6000	3	10.91	196.18	2	1	5	453	14	12.5564	0	593.182	692.045	3	0	0	556.154	17.4231	0	0	6	1	0	1	3	1	3	281	28.1	0
5818.18	3	18.279	238.86	1	0	0	166	8	18.27	0	618.182	721.212	10	0	0	6109.62	70.6	0	0	29405	7	0	4	23	11	3	2262	226.2	0
9090.91	5	15.037	230.98	1	0	2	29	19	14.4327	0	745	869.167	10	0	0	1297.85	10	0	0	5	2	0	6	13	6	3	4066	813.2	0
13090.9	3	5.852	361.38	0	0	4	718	19	20.1	0	593.182	741.477	7	0	0	10976.3	57.9385	0	0	4	3	0	6	5	4	3	4905	981	0
13636.4	3	8.991	483.94	1	1	0	57	9	23.49	0	659.091	714.015	8	0	0	11138.8	36.0769	0	0	0	5	0	5	19	11	3	3298	329.8	0
16363.6	3	8.129	559.01	1	1	5	519	9	5.79273	7	758.182	884.545	11	0	0	14313	53.3077	0	0	6	4	0	13	14	9	2	8928	0	0
22727.3	3	13.882	837.79	1	1	4	156	18	13.7127	2	560.455	700.568	15	0	0	29893.8	57.6	0	0	4	4	0	6	13	10	0	3978	397.8	0
5000	3	13.332	166.36	1	2	0	271	35	11.5936	0	680	736.667	5	0	0	5566.62	69.5692	1	0	2626	5.69049	0.00142201	8.4678	14.659	8.09808	3	411	82.2	0
16363.6	3	20.889	733.02	1	2	0	136	8	21.0982	0	556.364	695.455	15	0	0	8934.46	47.7	1	0	0	5	0	10	15	7	3	4520	904	0
5000	3	6.039	153.73	1	0	0	242	8	12.9845	0	663.636	829.545	10	0	0	11667.7	22.6	0	0	0	6	0	3	11	6	3	373	111.9	0
18909.1	3	6.228	493.45	2	0	0	218	0	2.63636	0	540	675	3	0	0	7250	74	1	0	0	1	0	2	9	5	3	4308	1292.4	0
6872.73	5	16.731	200.77	1	1	11	140	8	26.0836	0	564.545	611.591	15	0	0	11271	44.7	1	0	6461	5.69049	0.00142201	8.4678	14.659	8.09808	0	2188	656.4	0
32727.3	5	17.568	786.83	0	2	0	599	13	5.74909	1	725.455	906.818	9	0	0	16742.3	74.0923	0	0	121	3	0	9	19	11	2	2238	671.4	0
29545.5	3	11.539	812.45	0	1	4	138	0	19.42	0	758.182	821.364	9	0	0	29794.2	48.6462	1	0	4	4	0	4	15	9	3	10667	2133.4	0
6545.45	3	8.244	255	0	0	4	291	23	26.0727	0	585	731.25	13	0	0	24588.3	53	0	0	4	11	0	2	12	8	3	327	0	0
13090.9	3	10.791	398.52	1	1	0	120	21	19.5791	0	580.909	629.318	8	0	0	17555.1	82.8462	1	0	0	6	0	2	7	6	0	2508	0	0
6545.45	3	9.49	192.17	0	0	0	160	4	7.24909	0	645.455	753.03	16	0	0	18228	44.7	0	0	0	6	0	17	38	14	3	1809	180.9	0
12000	3	14.85	415.11	2	2	4	72	10	32.52	0	747.273	809.545	6	0	0	8471.08	47.0615	0	0	2	2	0	1	6	3	3	5623	1686.9	0
14181.8	3	9.16	382.5	1	2	4	493	42	16.0636	0	564.545	658.636	9	0	0	11596	100.615	0	0	4	2	0	10	4	3	1	3446	0	0
6027.27	3	17.57	198.56	1	0	0	216	8	19.6773	0	556.364	602.727	10	0	0	16016	38.8769	0	0	0	5	0	2	9	7	3	1803	540.9	1
11000	3	14.09	376.44	1	2	0	304	8	18.5073	0	622.727	674.621	7	0	0	19566	101.769	1	0	52760	5	0	5	12	8	3	1205	241	0
29545.5	3	6.99	771.82	0	0	0	64	14	18.0727	0	807.273	1009.09	16	0	0	8668	30.4615	0	0	0	6	0	6	22	12	3	3864	386.4	0
31818.2	3	10.49	1137.43	0	0	9	19	14	28.9855	0	654.545	709.091	19	0	0	107886	50.1	0	0	10	7	0	23	26	19	0	0	0	0
25000	5	19.646	696.23	0	0	4	53	19	23.58	0	604.545	755.682	20	0	0	25564.6	72.3462	0	0	4	8	0	17	25	11	4	9125	912.5	1
13909.1	3	6.03	517.41	0	0	4	47	17	14.0182	0	840	980	8	0	0	15457	37.0385	0	0	4	3	0	6	5	5	2	2346	234.6	0
6363.64	3	5.32	210.81	0	0	0	310	24	25.7236	0	625.909	730.227	9	0	0	6766.15	10.2462	0	0	0	6	0	6	12	6	0	1069	0	0
14181.8	5	17.991	344.35	1	0	0	270	44	27.7545	0	741.818	803.636	22	1	0	9277	56.9	1	0	0	4	0	27	15	9	2	4011	0	1
9818.18	3	13.959	402.54	1	0	0	736	31	28.56	0	609.091	761.364	14	0	0	11886	49.2	0	0	0	12	0	10	17	6	3	5273	527.3	0
6545.45	3	11.83	198.81	0	0	0	638	2	21.0455	0	636.364	742.424	11	0	0	13029	58.7	1	0	71	5.69049	0.00142201	8.4678	14.659	8.09808	3	2356	235.6	0
10909.1	3	9.49	384.34	0	0	0	491	30	3.55636	1	856.364	1070.45	5	0	0	9060.15	18.6	0	0	0	2	0	4	7	6	3	2858	285.8	0
9000	3	13.189	365.31	1	0	4	17	13	14	0	568.636	616.023	11	0	0	10898.1	83.8154	1	0	19710	2	0	9	6	5	3	5127	512.7	0
20400	5	19.19	531.33	0	2	0	45	21	38.1273	0	627.273	731.818	19	0	0	19216.2	61.9615	1	0	0	7	0	23	18	5	0	0	0	1
15606.8	5	12.897	447.12	0	2	4	172	13	10.1636	0	636.364	795.455	11	0	0	16286.5	73.7308	1	0	26	5	0	5	12	10	3	1823	364.6	0
11286.4	3	13.491	331.01	2	2	0	408	14	23.18	0	540	585	9	1	1	4335	49.2692	0	0	0	3	0	24	9	6	1	3738	373.8	0
5727.27	3	14.895	248.01	1	1	0	5	4	37	0	741.818	803.636	10	0	0	8280	56.7692	1	0	0	5	0	4	8	2	1	3320	332	0
21000	5	12.591	488.53	1	0	0	32	21	24.3082	0	769.091	833.182	12	0	0	11449.8	53.7231	0	0	0	5	0	5	11	4	0	0	0	0
4363.64	3	14.65	137.98	0	2	5	397	35	20.4218	0	600	700	9	0	0	10066	53.7231	1	0	6	3	0	24	14	9	0	422	126.6	0
9000	3	13.99	307.56	1	2	0	196	14	28.8982	1	660	825	9	0	0	16615.8	86.2	0	0	2	4	0	41	8	3	2	2528	505.6	0
5000	3	10.341	164.86	1	0	7	508	2	23.49	0	609.091	659.848	11	1	1	20196.9	84.2308	0	0	8	7	0.00142201	5	8	4	2	2320	696	0
8922.73	3	14.049	263.99	2	1	0	641	13	26.9673	0	677.273	790.152	13	0	0	8638.85	20.2154	0	0	0	4	0	6	14	7	0	0	0	0
38181.8	3	7.551	1103.09	0	2	0	116	14	10.6364	0	636.364	795.455	6	0	0	45257.3	103.062	0	0	0	3	0	20	8	4	3	9907	2972.1	0
15363.6	3	15.763	446.4	0	2	0	247	32	13.97	1	680	850	11	0	0	32771.8	41.6538	1	0	701	5	0	3	14	10	3	4305	1291.5	0
9818.18	3	4.788	361.38	0	1	2	538	14	31.4618	0	720	900	21	0	0	20918.2	40.4923	1	0	5	6	0	17	20	12	3	3060	918	0
4363.64	3	9.79	152.42	0	0	5	176	3	13.7373	0	774.545	839.091	10	0	0	52442.3	90.2308	1	0	2079	5.69049	0.00142201	8.4678	14.659	8.09808	0	0	0	0
28909.1	3	12.663	906.61	0	2	0	212	7	2.83	0	568.636	616.023	7	0	0	13025.8	44.1231	0	0	0	2	0	7	9	7	2	7503	1500.6	0
19636.4	5	12.342	393.35	0	0	4	112	23	11.0091	0	840	1050	10	0	0	32625	36.5	0	0	4	5	0	3	10	6	0	1162	348.6	0
15600	3	12.683	514.65	0	1	4	190	17	16.53	0	695	752.917	5	0	0	9136.62	83.3077	0	0	4	3	0	1	4	3	3	4443	1332.9	0
8000	3	7.89	250.29	0	0	4	305	15	13.4591	0	796.364	995.455	10	0	0	19566.9	44.1231	0	0	4	3	0	4	14	9	3	1830	0	0
18909.1	3	9.891	523.75	0	2	4	632	27	23.7455	0	700	875	8	0	0	9851	51.4615	1	0	4	3	0	15	11	6	3	842	168.4	0
35454.5	3	16.425	1088.34	0	2	0	370	13	8.01818	1	665	720.417	12	0	0	34614	96.9231	0	0	0	10	0.00142201	1	18	13	3	4429	442.9	0
24545.5	3	9.17	956.37	0	1	0	186	9	2.13636	0	636.364	742.424	5	0	0	12387.7	48	1	0	0	2	0	10	10	9	2	5651	1695.3	0
2400	3	12.74	80.57	2	1	4	120	21	12.8455	0	752.727	815.455	18	0	0	5546.77	29.6308	0	0	4	5	0	27	9	4	1	1019	203.8	1
8181.82	3	6.228	277.57	1	1	4	115	8	15.31	0	604.545	755.682	6	1	1	8130.46	111.692	0	0	4	3	0	3	9	7	0	0	0	0
3000	3	15.576	102.77	1	2	4	277	8	4.47273	0	604.545	755.682	7	0	0	5821.15	48	1	0	4	6	0	1	13	6	3	406	0	0
11818.2	3	8.459	311.94	1	1	0	108	21	6.10364	0	780	845	12	0	0	9823.85	28.8	0	0	0	5	0	4	28	13	3	1384	415.2	0
4575	3	15.31	159.29	0	2	2	122	9	11.5182	0	631.818	789.773	11	1	0	3769.23	34.3	0	0	5	11	0	0	12	1	2	910	0	1
7000	3	13.99	239.21	1	1	4	331	8	21.4145	0	720	840	26	1	0	42088.6	56.2	0	0	4	13	0	15	26	17	0	2456	736.8	0
4363.64	3	7.39	149.07	1	2	0	54	28	8.82727	0	630	787.5	4	0	0	4154	25.4154	0	0	0	2	0	1	9	7	3	925	277.5	0
6327.27	3	5.427	176.53	0	0	4	62	13	19.2218	0	795	861.25	11	0	0	7560	17.7231	1	0	43228	5	0	5	24	17	3	2547	254.7	1
16590.9	3	13.482	632.47	0	2	1	190	17	27.95	0	695	810.833	20	1	0	13406.6	64.5	1	0	1	11	0	5	28	14	3	507	152.1	1
16363.6	5	14.418	364.94	0	0	0	123	12	28.1618	0	796.364	862.727	11	0	0	17733.7	43.6615	0	0	0	4	0	24	12	5	1	7017	1403.4	0
5909.09	3	10.99	163.67	0	1	2	167	8	14.26	5	556.364	649.091	9	0	0	0	0	1	0	5	0	0	23	12	3	1	2450	735	0
10636.4	3	6.759	280	1	0	0	185	3	9.27818	0	593.182	692.045	8	0	0	12612.9	26.9538	1	0	71	5.69049	0.00142201	8.4678	14.659	8.09808	1	1347	134.7	0
13636.4	3	11.44	494.22	1	0	0	188	23	29.0836	0	636.364	742.424	19	1	1	20687	32.7692	1	0	0	10	0	11	33	17	1	7270	727	0
9818.18	3	10.64	390.83	1	1	0	57	9	8.74	1	540	585	11	2	1	10666.2	71.6154	1	0	0	9	0	5	11	6	1	3915	391.5	0
21818.2	5	19.19	520.91	0	1	0	591	40	16.8655	0	654.545	818.182	13	0	0	15990.2	66.6615	0	0	0	7	0	2	11	8	0	0	0	0
10909.1	5	13.33	275.07	0	1	0	178	23	12.1	0	544.091	589.432	4	0	0	8274	98.9692	0	0	0	3	0	4	6	4	0	0	0	0
21818.2	3	11.691	673.79	0	2	0	41	25	8.24727	0	675	843.75	13	0	0	12552	44.9	0	0	0	9	0	5	15	8	3	2793	558.6	0
6818.18	3	8.18	235.65	0	0	2	8	6	18.1527	1	613.636	664.773	8	0	0	18137	71.7	1	0	5	5	0	4	7	5	0	2176	652.8	0
11363.6	3	8.01	396.92	2	1	4	744	11	16.4127	0	675	787.5	6	0	0	2652	25.5231	1	0	4	2	0	12	8	2	1	5559	1667.7	0
7090.91	3	11.71	198.46	1	1	0	127	13	10.7182	0	556.364	649.091	11	0	0	2191.38	37.6	1	0	193	5.69049	0.00142201	8.4678	14.659	8.09808	0	1785	178.5	0
19800	5	23.76	497.17	0	2	4	180	32	26.6182	0	552.273	690.341	10	0	0	25203.7	78.6154	0	0	699	7	0	7	19	13	0	2582	0	0
8000	3	8.541	256.23	2	2	10	72	10	9.62182	0	622.727	778.409	5	1	1	1820.77	13.4769	0	0	11	2	0	2	10	3	3	3657	731.4	0
35000	3	7.97	1096.29	1	0	0	225	18	9.17	0	663.636	774.242	9	0	0	21255	35.0769	0	0	0	5	0	4	9	8	0	6810	681	0
4545.45	3	20.2	186.33	1	2	0	108	21	8.56636	0	552.273	644.318	7	0	0	12088.8	75.4	0	0	0	4	0	2	17	14	0	0	0	0
3272.73	3	11.358	120.65	0	1	10	140	8	14.6509	0	572.727	668.182	8	0	0	14477.1	60.6	0	0	11	5	0	5	7	5	3	1144	114.4	0
12000	3	6.92	370.09	1	1	4	548	36	16.92	0	645.455	806.818	12	0	0	18062.3	44.5	0	0	4	5	0	7	8	7	3	2597	519.4	0
2727.27	3	10.439	96.09	0	0	0	432	10	6.6	0	568.636	710.795	7	0	0	9124	42.8	0	0	0	4	0	0	14	4	3	1257	125.7	0
9450	3	15.026	321.43	2	2	0	167	8	31.0991	1	636.364	795.455	27	0	0	17344.6	15.7	0	0	0	17	0	1	44	22	0	0	0	1
8886.36	3	19.99	363.23	1	2	0	146	23	36.2509	0	725.455	785.909	9	0	0	5387.85	27.5769	1	0	0	6	0	3	22	16	0	0	0	1
22909.1	3	7.612	863.54	2	2	4	4	3	3.59182	0	654.545	709.091	4	0	0	56879.1	66.6615	1	0	4	3	0	0	12	11	3	4199	0	0
16363.6	3	6.633	456.54	0	0	4	215	8	6.79636	1	597.273	696.818	11	0	0	19100.8	69.4615	1	0	4	4	0	6	17	14	3	5032	1509.6	0
4090.91	3	10.791	166.05	0	1	10	247	32	14.4436	1	747.273	809.545	12	0	0	27644	81.8077	0	0	11	6	0	4	9	8	0	1840	184	0
5500	3	13.99	187.96	0	1	5	220	20	4.86	0	540	585	10	0	0	1879.38	15.6	0	0	6	3	0	6	10	10	0	1215	364.5	0
5000	3	10.64	162.85	1	1	0	246	36	13.9727	1	540	630	8	0	0	4631.85	66.1154	0	0	0	4	0	7	7	5	0	681	136.2	0
6000	3	11.691	202.14	1	2	0	199	24	12.1745	2	730.909	852.727	10	0	0	3928.62	71.4	1	0	0	3	0	23	17	11	3	110	22	0
19800	5	16.425	505.49	1	1	0	518	1	31.5636	0	747.273	871.818	11	0	0	18771.7	82.9615	0	0	0	7	0	13	12	4	0	0	0	0
30545.5	3	9.67	899.15	0	1	0	416	19	9.52364	0	780	975	12	0	0	45170.8	66	1	0	0	9	0	1	21	13	0	10686	0	0
4090.91	3	13.67	170.09	0	2	2	646	8	16.6727	0	670	725.833	23	0	0	38438	98.5385	0	0	5	14	0	5	23	13	0	1924	384.8	0
9818.18	3	17.86	389.69	0	2	0	689	2	15.3727	0	736.364	797.727	8	0	0	8651	76.0615	1	0	0	7	0	2	8	5	3	1582	474.6	0
18000	5	16.99	447.25	0	2	2	428	9	14.67	0	680	736.667	7	0	0	4723.85	44.5385	1	0	5	3	0	9	5	4	0	0	0	0
12272.7	5	9.99	318.64	0	0	0	654	18	23.5636	1	670	725.833	11	0	0	12332	75.4923	0	0	0	7	0	5	11	6	4	4761	952.2	0
29545.5	5	14.289	568.7	2	1	0	307	14	33.1091	0	650	812.5	6	0	0	65640.6	81.4615	1	0	0	5	0	2	9	6	4	7129	0	0
2909.09	3	6.68	98.34	0	0	2	21	13	10.78	0	713.636	773.106	6	0	0	3216.92	12.1154	0	0	5	3	0	7	7	7	3	992	0	0
17454.5	5	8.937	339.41	0	0	0	266	31	9.42	0	601.364	751.705	11	0	0	5651.08	16.8	0	0	0	6	0	3	15	4	1	3786	1135.8	0
26181.8	5	12.089	521.7	0	1	0	514	13	18.4545	0	785.455	916.364	12	0	0	29622.7	94	0	0	0	5	0	5	8	8	0	0	0	0
10000	3	5.852	301.15	1	0	0	341	14	24.8727	0	740	925	12	0	0	6051.23	21.2308	0	0	0	5	0	9	28	16	0	1185	237	1
35290.9	3	16.841	1126.35	1	2	4	124	13	27.0636	0	705	822.5	12	0	0	38142.5	103.962	0	0	33	6	0	10	10	4	3	13322	1332.2	0
7636.36	3	12.591	287.06	1	1	0	184	26	26.6182	0	540	585	9	0	0	12982.3	61.2	1	0	0	6	0	15	9	7	0	0	0	0
16363.6	5	15.61	482.23	0	1	0	465	19	11.8473	0	695	810.833	13	0	0	29675.8	68.7692	1	0	0	12	0	4	19	9	2	7121	2136.3	0
5909.09	3	9.99	161.32	2	0	10	491	30	24.3636	3	736.364	920.455	18	1	1	14883.5	65	1	0	11	11	0.00142201	7	33	11	0	0	0	1
20000	3	7.191	626.64	2	2	4	5	4	8.77091	2	622.727	674.621	11	0	0	15746.8	67.7385	0	0	4	4	0	6	13	9	3	1684	0	0
31818.2	3	15.61	1223.77	1	1	0	253	21	20.91	0	572.727	620.455	12	0	0	45586.2	69.3538	1	0	0	7	0	11	14	7	2	10320	3096	0
10909.1	3	11.99	332.1	0	0	2	282	7	20.4909	1	556.364	649.091	7	0	0	11471	63.4154	1	0	5	3	0	3	7	1	3	2017	201.7	0
5909.09	3	12.231	169.9	1	0	0	141	13	37.2873	0	736.364	797.727	12	0	0	12443	85.9615	1	0	0	9	0	6	10	7	3	199	39.8	0
2400	3	9.93	70.92	1	0	4	195	38	17.2227	0	593.182	642.614	8	0	0	2773.85	34.7846	1	0	4	4	0	3	8	4	3	833	249.9	1
10909.1	3	7.26	309.97	2	0	2	710	45	7.87909	0	630	735	7	0	0	2406.46	16.8462	1	0	5	2	0	7	9	6	1	3468	0	0
11818.2	3	8.32	409.3	2	0	0	342	21	0.905455	0	731.818	792.803	3	0	0.138997	241.154	2.3	1	0	968	5.69049	0.00142201	8.4678	14.659	8.09808	2	4115	823	0
25454.5	5	7.641	574.33	0	0	0	51	13	3.18545	0	815	882.917	6	0	0	7062.46	18.9231	0	0	0	3	0	3	4	3	5	13920	1392	0
13090.9	3	7.11	375.49	2	2	3	161	14	18.6727	0	805	872.083	8	0	0	2352.92	13.5	1	0	3	3	0	8	10	6	3	518	103.6	0
17727.3	3	11.565	504.33	2	1	4	63	14	22.7	0	752.727	815.455	16	0	0	35238.5	61.7538	1	0	4	11	0	2	30	27	3	220	22	0
9800	3	14.049	342.66	0	2	0	137	32	28.2364	0	650	758.333	8	0	0	13078.2	62.6	0	0	0	5	0	8	10	4	2	1337	133.7	0
14454.5	3	21.816	625.81	0	1	0	678	2	23.3673	0	618.182	669.697	18	0	0	16627	76.3846	1	0	0	13	0	16	37	11	0	2303	460.6	1
11454.5	5	15.939	329.33	1	1	0	99	8	22.8545	0	690	747.5	11	0	0	17607.7	65.5385	0	0	0	4	0	5	16	9	1	3792	758.4	1
3545.45	3	10.791	99.63	1	1	3	423	4	26.8145	0	801.818	935.455	5	0	0	3145.69	41.4462	0	0	3	2	0	2	3	3	2	829	0	0
19681.8	5	8.39	443.04	0	1	0	71	9	19.2727	0	605.455	756.818	14	0	0	52183.4	57.6	1	0	0	7	0	10	24	13	2	6942	0	0
6818.18	3	18.25	272.09	1	1	5	177	26	3.62455	0	720	900	6	0	0	13359.2	87.4154	1	0	6	5	0	2	14	11	3	372	74.4	0
15954.5	5	14.31	316.3	0	1	0	261	8	7.03636	0	609.091	710.606	20	1	1	11387.4	39	0	0	0	6	0	12	35	11	2	4426	442.6	0
6545.45	3	7.96	187.91	2	1	8	290	18	8.36	0	681.818	795.455	18	0	0	13191.2	23.1923	0	0	9	5	0	16	12	6	3	785	78.5	0
7179.55	3	14.421	205.02	1	0	0	49	12	21.9382	0	763.636	890.909	12	0	0	4470.46	28.8	1	0	0	4	0	1	12	7	2	1373	411.9	1
24500	5	20.889	635.41	1	2	0	9	7	12.6	0	613.636	664.773	9	0	0	15683.1	72.1538	0	0	0	4	0	6	7	4	2	5645	1693.5	0
24545.5	3	5.852	903.45	0	1	4	108	21	4.5	0	740	863.333	7	0	0	33297.4	45.9	0	0	4	6	0	6	12	7	0	5395	0	0
19090.9	3	7.49	653.14	1	0	0	671	13	24.3545	0	741.818	865.455	10	0	0	1621.15	6.57692	0	0	0	4	0	48	7	7	1	1192	119.2	0
17727.3	3	8.496	480.08	0	1	0	64	14	9.43	0	670	781.667	9	1	1	10246.9	76.2692	0	0	0	5	0	8	8	2	3	941	0	0
22909.1	5	15.291	521.8	1	2	0	342	21	25.32	0	640.909	747.727	8	0	0	21928.6	83.3538	0	0	0	7	0	2	14	5	0	0	0	0
10000	3	16.425	362.78	0	0	0	523	13	7.28182	1	580.909	677.727	6	0	0	234.231	4.84615	1	0	0	1	0	3	3	2	1	4843	1452.9	0
10000	5	12.62	225.6	0	0	2	606	4	21.4145	0	605.455	756.818	14	0	0	5232	15.6	0	0	5	4	0	5	18	12	4	1569	156.9	1
33775	3	17.622	1187.77	0	2	0	138	0	45.7636	0	564.545	705.682	9	0	0	22429.1	96.4615	0	1	0	3	0	7	17	6	0	0	0	0
31818.2	3	9.675	1141.72	0	1	0	484	21	19.27	0	618.182	772.727	28	0	0	48932.2	49.9615	1	0	0	15	0	6	31	17	3	859	171.8	0
10909.1	3	13.698	347.74	1	0	0	368	3	10.15	0	613.636	767.045	8	0	0	21426.5	79.8462	1	0	0	6	0	3	13	8	3	3161	632.2	0
6572.73	3	13.365	208.42	1	2	0	184	26	21.32	1	544.091	589.432	17	1	1	7589.08	35.4462	0	0	0	10	0	13	22	14	1	523	0	0
5727.27	3	8.99	222.57	2	0	0	56	8	28.0145	0	780	975	9	0	0	4025.54	19.1538	0	0	0	3	0	9	14	9	3	630	0	0
12272.7	3	13.11	455.59	1	0	0	322	13	8.8	0	556.364	649.091	8	0	0	8642.77	41.5	1	0	259	5.69049	0.00142201	8.4678	14.659	8.09808	3	3195	958.5	0
17050	3	15.543	610.18	1	2	0	10	8	31.5273	0	609.091	710.606	14	0	0	16600.6	74.7385	1	0	1312	8	0	5	10	3	0	0	0	1
4600	3	22.491	182.88	1	0	6	176	3	20.5727	0	695	810.833	6	0	0	6862	81.7	1	0	7	2	0	15	7	3	0	0	0	0
16363.6	3	17.748	740.43	1	1	0	51	13	8.47	0	670	837.5	6	0	0	28328.3	107.654	0	0	193	4	0	2	9	7	0	8545	854.5	0
7090.91	3	5.852	180.69	2	1	4	539	42	10.62	0	735	796.25	11	0	0	19112.3	67.0385	0	0	4	3	0	40	11	10	3	2422	484.4	0
1963.64	3	12.29	80.05	1	0	8	273	8	11.5364	0	576.818	624.886	4	0	0	5847.69	88.6308	1	0	9	4	0	0	4	3	0	1078	323.4	1
16800	3	24.741	690.29	0	2	4	116	14	24.45	0	600	650	9	0	0	10106	68.9231	1	0	4	5	0	4	21	9	0	1935	387	0
9454.55	3	13.189	265.68	0	1	0	288	13	46.4618	1	556.364	649.091	13	0	0	7263.85	43.2	0	0	0	5	0	8	20	13	1	1207	362.1	0
35454.5	3	16.489	1039.82	1	2	0	652	0	21.3382	0	622.727	778.409	8	0	0	29328.9	107.885	1	0	0	7	0	3	10	10	0	12109	1210.9	0
7272.73	3	15.741	274.63	2	2	0	80	21	12.7745	0	601.364	751.705	21	0	0	15216.9	23.1692	0	0	0	4	0	4	30	13	0	0	0	1
23000	3	9.135	743.77	1	2	4	31	2	24.5818	0	580.909	726.136	9	0	0	12780.9	89.3	0	0	4	5	0	7	8	5	0	0	0	0
19636.4	3	6.633	730.46	0	2	0	502	7	13.4273	0	805	939.167	10	0	0	7752	13.9615	0	0	32920	2	0	6	8	4	3	7017	0	0
12000	3	6.92	370.09	1	1	0	193	13	21.3545	0	672.727	840.909	15	0	0	27724.6	36.7231	0	0	0	9	0	4	18	9	3	1008	100.8	0
24000	5	11.565	544.24	0	2	4	156	18	18.5	0	645.455	699.242	11	0	0	33511.4	50.1	1	0	4	9	0	7	16	10	4	10682	3204.6	0
5909.09	3	9.76	160.78	0	0	9	53	19	21.3164	0	631.818	684.47	15	0	0	16023.5	49.3846	1	0	1948	5.69049	0.00142201	8.4678	14.659	8.09808	3	2136	427.2	0
9818.18	3	13.779	313.36	0	1	0	88	32	14.3182	0	576.818	672.955	14	0	0	28519	84.6462	0	0	0	5	0	9	9	6	3	4283	0	0
6545.45	3	9.99	193.58	0	0	4	132	12	17.3291	0	660	825	22	1	1	10375.4	34.6154	1	0	4	9	0	15	27	12	3	560	112	1
14181.8	3	7.46	373.06	1	1	0	271	35	2.41364	0	774.545	903.636	5	0	0	6183	27.1385	0	0	0	4	0	1	5	5	3	4120	0	0
16363.6	3	14.949	509.69	2	2	0	575	32	14.4082	0	763.636	890.909	5	0	0	10450	115.962	0	0	0	4	0	2	4	3	0	0	0	0
11127.3	3	8.998	320.48	1	0	0	29	19	16.5845	0	589.091	687.273	8	1	0	5421.23	60.7	1	0	0	3	0	16	6	5	2	2147	214.7	0
21818.2	3	11.44	658.95	0	1	0	29	19	19.9091	1	736.364	859.091	6	0	0	17283	89.0615	1	0	0	3	0	3	4	3	0	0	0	0
7025	3	11.99	233.3	1	2	0	191	5	23.2091	0	660	770	5	0	0	3634.62	68.5	0	0	0	3	0	5	8	7	3	2300	690	0
2250	3	8.541	72.07	1	1	0	120	21	18.2836	0	769.091	897.273	11	0	0	11476.2	44.5846	1	0	0	7	0	4	10	8	0	0	0	0
14181.8	5	15.389	279.16	1	0	4	140	8	20.13	0	720	780	9	1	1	4765.38	64.6154	0	0	4	4	0	6	15	6	0	0	0	0
2454.55	3	19.92	111.37	0	1	0	188	23	21.23	1	730.909	913.636	11	0	0	15387.7	57.7231	0	0	0	5	0	4	17	7	3	217	0	0
21927.3	3	12.99	902.87	1	1	0	261	8	24.4555	0	736.364	920.455	7	1	0	32479.4	86.1231	0	0	0	5	0	7	10	8	0	894	268.2	0
16000	3	14.663	541.65	0	0	4	595	23	23.4	0	725.455	906.818	9	0	0	11641.8	86.8615	0	0	4	5	0	9	21	16	3	2448	244.8	0
11000	3	8.998	345.62	2	1	0	88	32	19.9855	0	705	822.5	9	0	0	5265.08	42.1154	0	0	0	2	0	3	13	6	3	4171	417.1	0
7090.91	3	13.33	220.05	0	2	1	248	11	24.1118	0	564.545	611.591	17	0	0	24692.3	60.5231	0	0	1	12	0	8	19	9	0	0	0	1
11100	3	10.16	359.01	2	2	0	54	28	33.24	0	640.909	747.727	10	0	0	19785.2	84	1	0	847	4	0	7	16	8	3	2330	466	0
5318.18	3	6.921	202.76	0	0	0	297	18	11.3973	0	600	700	9	0	0	1630.38	31.0154	0	0	0	3	0	7	6	3	3	680	0	0
28375	5	28.413	846.71	2	1	0	544	20	23.6127	0	600	650	11	0	0	3033	24.3	1	0	0	5	0	9	8	3	0	0	0	0
10909.1	3	6.369	363.93	0	2	2	71	9	17.8909	0	713.636	892.045	8	0	0	52371.8	12.9231	1	0	289	5.69049	0.00142201	8.4678	14.659	8.09808	3	1152	115.2	0
5909.09	3	5.32	150.58	0	0	0	537	19	3.51818	0	690.909	748.485	12	0	0	36433.4	42	0	0	0	5	0	1	26	16	2	1725	172.5	0
28363.6	5	26.77	729.56	0	2	0	398	2	15.9382	0	660	770	8	0	0	57675	91	0	0	0	6	0.00142201	3	26	17	3	2893	0	0
14545.5	3	33.979	687.05	1	2	0	241	7	31.6	0	540	585	13	1	1	8558.08	66.8077	1	0	0	6	0	23	27	6	0	0	0	0
19529.5	5	15.05	393.57	0	0	0	134	8	9.29455	0	585	633.75	7	0	0	52301	69.2308	0	0	0	5	0	0	14	10	2	7901	790.1	0
6709.09	3	17.149	286.64	1	2	0	68	15	5.07	0	780	975	4	0	0	4566.92	49.6154	1	0	0	3	0	0	6	4	0	0	0	0
4363.64	3	10.296	131.79	1	2	4	548	36	18.5909	0	560.455	607.159	21	0	0	6404.46	48	0	0	4	14	0	8	27	19	0	0	0	1
4704.55	3	20.339	209.3	1	2	0	392	32	25.2818	0	600	700	5	1	1	6943.85	77.3077	0	0	0	4	0.00142201	1	10	4	0	0	0	0
18181.8	3	10.251	658.48	2	0	4	21	13	21.6909	0	601.364	751.705	9	0	0	55918.8	81.6	0	0	4	4	0	2	9	5	3	5641	0	0
13090.9	3	6.534	371.96	0	1	5	124	13	3.98455	1	576.818	672.955	13	0	0	11908.6	12.6462	0	0	6	6	0	3	22	14	1	4522	1356.6	0
8727.27	3	10.791	265.68	1	0	0	5	4	8.58182	1	675	787.5	11	3	0	10218.5	42.4615	1	0	0	9	0.00142201	2	21	9	2	3479	695.8	0
22909.1	3	7.9	876.13	0	1	0	167	8	11.9536	0	677.273	846.591	19	0	0	62563.8	85.5	1	0	0	6	0	12	17	6	3	12235	2447	0
18000	3	16.29	698.95	0	2	4	20	15	16.0118	0	556.364	695.455	6	0	0	14734.5	103.846	0	0	4	3	0	3	18	10	0	0	0	0
5909.09	3	19.327	179.69	0	2	5	112	23	37.7673	0	690.909	806.061	11	0	0	7059.23	34.6769	1	0	6	5	0	9	11	4	0	0	0	1
7090.91	3	14.661	211.81	0	2	2	248	11	11.4791	0	618.182	721.212	7	0	0	2265	28	0	0	5	3	0	7	8	4	1	1576	157.6	0
9000	3	13.49	305.38	1	0	0	277	8	15.6218	2	556.364	695.455	11	0	0	23900	74	0	0	0	6	0	20	13	8	2	1407	0	0
3272.73	3	5.852	120.46	0	0	2	369	21	12.5236	0	564.545	658.636	11	1	1	866.769	5.19231	0	0	5	6	0	5	26	12	3	1500	150	0
28636.4	5	19.52	917.97	0	2	0	95	13	19.5182	0	790.909	856.818	15	0	0	12900	38.3077	0	0	30134	11	0	11	24	18	0	0	0	0
10000	3	9.891	327.34	0	0	0	49	12	11.1518	1	720	780	8	0	0	8776.62	80.6615	0	0	0	6	0	6	7	3	2	3929	1178.7	0
32727.3	5	14.661	734.18	0	2	0	4	3	28.0364	0	769.091	961.364	22	0	0	34000.4	100.038	1	0	48139	17	0	5	23	9	0	0	0	0
9654.55	3	11.451	383.03	1	1	0	116	14	21.7636	0	572.727	668.182	10	0	0	4373.54	9.9	1	0	0	5	0	10	11	10	3	1147	114.7	0
15272.7	5	17.919	342.62	2	1	4	152	14	16.7891	0	636.364	795.455	16	0	0	30440.8	46.2692	1	0	4	8	0	3	22	13	0	0	0	1
26181.8	3	11.691	808.54	0	1	4	162	2	14.5391	0	747.273	809.545	9	0	0	31365	74.5846	0	0	4	7	0	5	19	14	2	7771	1554.2	0
4136.36	3	8.18	109.97	1	1	0	270	44	27.23	0	613.636	664.773	8	1	1	2928	21.6923	0	0	0	4	0	20	18	6	0	416	41.6	0
8181.82	3	10.923	290.11	0	1	0	184	26	24.4582	0	730.909	913.636	18	1	1	9757.85	48.0308	0	0	0	4	0	11	16	8	2	217	0	0
12218.2	3	4.788	337.29	0	1	4	526	20	12.7064	0	580.909	726.136	13	0	0	3700.31	7.38462	0	0	4	2	0	8	25	15	0	0	0	1
22690.9	3	12.591	710.8	0	1	0	5	4	21.21	4	544.091	680.114	21	1	1	75891.8	54.2	0	0	0	13	0	9	28	11	3	2843	568.6	1
6545.45	3	8.261	186.67	1	1	0	74	30	22.71	0	659.091	714.015	10	0	0	5038.92	43.6615	1	0	4109	5.69049	0.00142201	8.4678	14.659	8.09808	3	429	42.9	1
5584.09	3	12.897	234.36	1	0	0	149	22	16.8545	1	665	775.833	7	0	0	4031.54	70.3846	1	0	0	5	0.00142201	6	11	6	2	3162	632.4	0
31818.2	3	9.44	1120.18	0	1	0	131	6	16.9273	1	700	875	31	1	0	93580.6	37.1077	0	0	0	9	0	14	24	10	3	4921	984.2	0
25454.5	3	5.32	843.22	0	0	0	261	8	13.6818	1	730	851.667	18	0	0	251383	31.2	0	0	0	4	0	6	22	14	3	968	193.6	0
38181.8	3	15.61	1223.77	0	1	0	19	14	21.98	0	622.727	778.409	16	0	0	56042.8	62.3077	1	0	0	8	0	9	27	21	3	6935	0	0
14545.5	5	11.704	345.02	0	0	0	53	19	11.94	0	654.545	709.091	12	1	1	3363.23	80.0769	1	0	0	2	0	19	10	4	4	6882	1376.4	0
8400	3	16.115	289.76	1	1	0	757	15	21.0364	0	568.636	663.409	4	0	0	7393.85	84.4615	0	0	0	3	0	7	5	2	0	0	0	0
1300	3	14.49	44.75	2	1	0	467	5	16.3855	0	604.545	705.303	15	1	1	1218	7.53846	1	0	0	2	0	12	30	8	1	138	0	1
10909.1	5	18.891	324.58	0	2	0	2	2	16.98	2	736.364	920.455	13	0	0	28102.2	93.2308	1	0	0	11	0	1	18	13	0	0	0	0
3272.73	3	9.16	95.63	1	1	4	455	13	20.6727	0	680	850	18	1	1	6136.31	35.8615	1	0	4	4	0	22	12	7	2	201	40.2	1
12000	3	10.377	395.89	0	0	0	266	31	7.04727	0	758.182	884.545	11	0	0	10246.2	31.4	1	0	0	4	0	14	18	5	3	4649	1394.7	0
15454.5	3	11.682	572.64	1	0	0	165	17	14.2909	0	769.091	833.182	5	0	0	21984.2	75.3846	1	0	159	5.69049	0.00142201	8.4678	14.659	8.09808	3	5354	1070.8	0
19863.6	5	15.543	546.21	1	1	4	435	36	12.5818	1	685	742.083	19	0	0	18991	46.8923	1	0	4	10	0	2	24	13	2	8882	888.2	0
43636.4	3	12.231	1359.16	1	2	4	19	14	56.7	0	636.364	689.394	14	0	0	38548.5	73.1	0	1	4	6	0	10	15	11	0	0	0	0
10000	3	10.99	327.34	1	0	3	62	13	14.5964	0	670	725.833	6	1	1	5652.69	63	1	0	3	5	0.00142201	2	27	14	0	0	0	0
14454.5	3	13.482	459.19	1	2	0	797	14	7.41	0	593.182	741.477	3	0	0	3658.15	97.0308	0	0	0	2	0	2	3	2	1	724	0	0
28636.4	5	17.57	880.61	1	2	0	167	8	25.8436	0	640.909	694.318	10	1	1	11316.9	33.9692	1	0	0	4	0	5	13	6	3	3491	349.1	0
8727.27	3	6.741	248.82	0	0	0	614	3	30.2727	1	758.182	821.364	10	0	0	10322.3	62.6	0	0	0	4	0	9	9	3	3	2080	0	0
35454.5	5	21.989	794.65	0	2	0	230	2	22.1818	0	690	747.5	12	0	0	30725	90.2	0	0	0	5	0	4	15	6	1	7551	755.1	0
22409.1	3	10.332	812.63	0	2	0	258	8	18.5236	0	593.182	692.045	11	0	0	33503.1	51.6923	0	0	0	5	0	2	17	12	0	1366	273.2	0
4545.45	3	13.545	173.45	1	2	5	323	12	28.6255	0	572.727	715.909	15	6	1	7060.38	19	1	0	6	11	0.00142201	3	13	5	0	1882	564.6	0
5454.55	3	14.49	206.5	1	0	9	240	21	13.3936	1	568.636	616.023	19	0	0	21394.2	70.7	0	0	10	8	0	6	27	15	1	582	58.2	0
21272.7	3	4.788	542.07	0	0	4	5	4	14.2636	0	889.091	1111.36	11	0	0	938.077	2.88462	0	0	4	3	0	16	6	5	1	8379	0	0
18181.8	3	4.788	602.3	0	0	7	385	8	0.294545	0	741.818	803.636	7	1	1	3132.69	14.7	0	0	8	1	0	4	16	8	1	1956	195.6	0
20000	5	12.089	434.75	0	1	0	234	42	21.42	0	685	742.083	10	0	0	14064	55.4615	0	0	0	5	0	16	15	11	0	0	0	0
21363.6	5	24.189	648.92	2	1	0	134	8	21.2945	0	544.091	589.432	9	1	1	11856.9	55.8	1	0	0	6	0	6	31	19	1	7110	2133	0
13090.9	5	8.253	333.46	0	1	0	171	8	13.25	0	686.364	800.758	13	0	0	16138	24.9231	0	0	0	5	0	8	17	8	1	1910	191	0
40000	3	17.991	1486.34	0	2	0	78	19	15.3382	0	747.273	934.091	15	0	0	43530.5	86.0308	0	0	0	8	0	9	13	7	3	1686	505.8	0
8000	3	13.491	277.29	1	2	0	211	19	7.04	0	544.091	634.773	13	0	0	9201.23	103.385	0	0	0	5	0	11	5	3	3	874	87.4	1
7200	3	13.98	246.01	2	1	0	430	7	23.6818	0	690	747.5	5	0	0	6041.54	92.9538	0	0	0	2	0	8	6	4	0	0	0	0
13745.5	5	13.65	290.9	0	2	4	271	35	7.27636	0	780	845	5	0	0	13253	46.1538	0	0	4	2	0	1	8	5	0	4340	434	0
4090.91	3	14.79	172.82	1	0	0	156	18	8.34	0	552.273	644.318	7	0	0	6396	96.2769	1	0	1086	5.69049	0.00142201	8.4678	14.659	8.09808	0	0	0	0
9454.55	3	12.29	266.83	1	1	0	616	0	9.11455	0	548.182	593.864	5	0	0	1577.31	35.8615	1	0	0	2	0	1	12	10	2	1476	442.8	0
7909.09	3	13.33	245.44	1	2	0	233	19	25.6909	0	763.636	954.545	8	0	0	3835.38	46.1538	1	0	0	6	0.00142201	7	6	2	1	3411	341.1	0
3545.45	3	16.99	106.95	1	2	5	701	30	12.3909	0	600	750	9	0	0	8335	61.4923	1	0	6	1	0	25	7	5	3	925	277.5	0
15709.1	3	17.577	531.72	0	2	2	189	9	9.83455	1	720	900	12	0	0	10333	92.4	0	0	5	6	0	6	15	6	3	731	73.1	0
4090.91	3	13.99	170.87	1	1	5	116	14	8.4	0	752.727	815.455	4	0	0	6124	53.6308	0	0	6	3	0	4	4	3	1	1748	524.4	0
16609.1	3	14.289	683.89	1	1	4	32	21	31.79	1	752.727	815.455	17	0	0	10226.8	41.1385	0	0	4	3	0	10	23	10	3	7403	2220.9	0
5909.09	3	11.421	167.73	1	1	0	136	8	30.91	0	675	731.25	9	0	0	18153.5	77.9	1	0	0	6	0	7	15	12	0	1898	379.6	0
6500	3	12.591	222.13	1	1	0	512	21	27.0436	0	730.909	913.636	5	0	0	3462.46	60.3077	1	0	0	3	0	8	5	1	3	447	134.1	0
2727.27	3	9.333	97.33	1	1	1	277	8	3.82909	0	593.182	741.477	2	0	0	1890	47.2769	1	0	9389	5.69049	0.00142201	8.4678	14.659	8.09808	0	0	0	0
10000	3	11.691	336.9	1	0	0	17	13	18.9164	0	560.455	700.568	12	1	1	10490.8	51.7846	1	0	0	6	0	10	9	3	3	4473	0	1
5000	3	17.091	183.26	0	2	0	400	17	33.4909	0	640.909	801.136	7	0	0	668.077	5.9	1	0	0	1	0	6	15	10	2	540	108	0
10000	3	12.231	339.79	2	1	0	386	19	23.13	0	720	780	7	2	1	9465	63.1	0	0	0	5	0	2	7	6	3	1339	401.7	0
8800	3	15.31	306.4	0	2	3	230	2	21.2973	0	720	900	16	1	1	7772.15	30.2769	0	0	3	8	0	7	18	2	3	1957	391.4	0
3781.82	3	17.919	112.97	1	2	6	666	13	38.8818	0	576.818	624.886	27	0	0	20530.4	60.4154	1	0	7	10	0	41	20	9	3	1272	0	1
5000	3	12.74	167.85	1	1	7	108	21	12.7391	5	622.727	778.409	2	0	0	4017.23	91.2692	0	0	8	0	0	8	11	7	3	1967	590.1	0
10909.1	3	12.837	330.57	2	0	0	560	44	21.3	10	600	700	12	1	1	5092.77	87.3231	0	0	0	4	0	18	5	4	3	1622	324.4	0
11363.6	3	27.335	496.01	1	1	0	177	26	7.55	0	544.091	680.114	9	0	0	9601.85	63.9692	1	0	0	4	0	6	7	5	1	4466	1339.8	0
7000	3	13.185	241.46	1	1	0	154	2	11.3818	0	700	816.667	10	2	2	10861.2	54.4	0	0	0	5	0	11	8	3	0	656	131.2	0
9500	3	14.33	326.22	0	2	0	356	32	31.6	5	556.364	602.727	8	0	0	14178.5	79.5	1	0	269	5	0	2	20	13	1	4399	1319.7	0
13636.4	3	7.24	464.81	0	0	0	296	5	22.4836	1	801.818	1002.27	18	0	0	11976.5	31.0154	0	0	0	7	0	22	15	3	3	1713	513.9	0
9000	3	8.18	345.62	1	2	4	242	8	5.57182	0	725.455	846.364	4	0	0	11610	69.8923	0	0	4	2	0	8	8	6	0	4440	0	0
11818.2	3	14.616	352.76	0	2	0	355	18	20.19	0	769.091	897.273	20	1	1	7788	27.8077	0	0	0	10	0	3	18	10	0	0	0	0
9000	5	26.3	331.31	2	2	0	111	8	16.3909	0	631.818	684.47	13	0	0	7281.08	30.6	0	0	0	6	0	7	14	7	3	2246	224.6	0
10181.8	5	26.389	322.14	0	0	9	271	35	21.2364	5	640.909	801.136	11	0	0	8059.62	91.6154	0	0	10	6	0	18	12	6	1	3766	1129.8	0
10909.1	3	8.325	319.17	0	1	0	635	3	3.74182	0	774.545	968.182	11	1	1	6639.23	40	1	0	241	2	0	4	20	7	2	2973	891.9	0
21272.7	3	15.59	629.19	1	2	3	290	18	23.4109	0	730.909	913.636	10	1	1	6078.46	67.5231	0	0	3	3	0	7	15	9	0	0	0	0
16363.6	5	15.59	433.82	0	1	0	48	10	20.15	0	645.455	699.242	12	1	0	5952	52.8462	0	0	0	5	0	8	11	2	3	8894	2668.2	0
35000	3	17.171	1223.77	0	2	0	683	48	27.8673	0	725	906.25	10	0	0	44420.9	69.1385	1	0	0	6	0	1	7	5	0	6091	609.1	0
10800	3	5.852	325.24	0	0	4	4	3	8.7	0	775	839.583	11	0	0	17455.4	21.1077	0	0	4	6	0	10	14	7	2	5303	530.3	0
7527.27	3	17.27	329.25	0	1	0	362	35	11.9	0	544.091	634.773	8	1	1	12741.9	87.8769	1	0	26	3	0	7	13	11	3	1013	202.6	0
35000	3	12.089	1145.69	1	2	4	268	8	22.2764	0	659.091	714.015	3	0	0	33451.4	92.4	1	0	4	2	0	2	10	6	2	12212	2442.4	0
12272.7	5	11.691	341.22	0	0	2	127	13	12.47	0	752.727	815.455	8	2	0	1082.77	5.81538	0	0	5	3	0	11	10	8	1	5762	0	0
34909.1	3	13.67	1088.57	1	1	4	566	30	29.4909	0	622.727	778.409	19	0	0	55817.3	85.7231	0	0	4	8	0	13	13	9	3	10270	3081	0
10400	3	14.421	350.97	2	2	0	25	13	6.21	0	695	752.917	10	0	0	13101.2	75.9	1	0	0	9	0	0	18	15	1	1738	173.8	0
18000	3	6.72	553.49	1	1	5	53	19	14.57	0	878.182	1097.73	6	0	0	3740	10.8	0	0	6	4	0	9	8	5	1	1054	0	0
3272.73	3	7.07	123.64	2	0	5	191	5	9.40091	0	872.727	945.455	9	0	0	1043.08	4.3	0	0	6	2	0	7	11	4	2	214	0	0
2000	3	8.019	62.02	0	0	5	19	14	6.71818	3	650	704.167	9	0	0	142.154	2.3	1	0	56	5.69049	0.00142201	8.4678	14.659	8.09808	0	620	186	1
5318.18	3	8.349	140.17	1	0	4	74	30	19.4909	0	650	758.333	11	0	0	4368	21.3231	1	0	4	4	0	9	14	7	3	908	0	0
24000	3	10.087	765.1	1	1	0	143	8	7.65818	0	685	742.083	11	1	0	35638.2	83.6308	0	0	0	2	0	38	12	5	2	3277	655.4	0
29309.1	3	11.14	813.57	0	1	0	134	8	18.1182	1	576.818	721.023	11	0	0	94879	75.1692	1	0	0	3	0	7	13	6	3	11306	0	0
13090.9	5	6.534	318.79	1	1	0	300	9	17.98	0	752.727	815.455	19	0	0	44108.1	67.1538	0	0	0	12	0	14	30	20	0	7113	1422.6	0
4090.91	3	11.99	166.05	1	1	3	116	14	18.41	0	580.909	677.727	6	0	0	5076	31.4	0	0	2	3	0	4	3	2	1	969	290.7	0
23636.4	3	12.897	686.77	0	1	4	124	13	20.5309	0	609.091	659.848	14	0	0	32254.2	84.6	1	0	33	9	0	0	19	10	3	8859	1771.8	0
32727.3	3	13.545	1248.84	2	1	4	131	6	10.5791	0	627.273	679.545	12	0	0	34473.2	71.5385	1	0	4	8	0	8	28	24	0	0	0	0
5454.55	3	13.68	170.12	1	1	0	566	30	5.16364	0	720	780	11	1	1	5794	59.9846	1	0	0	6	0	0	15	8	3	558	167.4	0
6872.73	3	6.68	258.15	0	1	3	341	14	20.7382	0	645.455	699.242	13	0	0	8012.31	58.3846	0	0	3	3	0	9	14	7	1	3690	738	0
3636.36	3	8.18	125.68	0	1	4	235	8	12.9164	0	552.273	598.295	7	0	0	8680.38	63.1385	0	0	4	4	0	9	5	1	3	262	78.6	0
35000	5	12.879	820.03	0	2	0	517	14	11.2636	0	752.727	878.182	23	0	0	22980	56.3231	0	0	0	8	0	13	39	23	0	0	0	0
7272.73	3	6.615	248.3	1	1	4	109	21	1.37455	0	580.909	629.318	4	1	1	184	0.923077	0	0	4	2	0	3	5	4	2	3273	327.3	0
12409.1	3	17.28	385.96	1	2	5	729	14	9.13091	1	670	781.667	9	0	0	6009	68.1692	1	0	29038	4	0	6	15	3	0	1208	120.8	0
27272.7	5	14.31	585.74	0	1	0	255	9	26.7545	0	668.182	723.864	11	0	0	16129.1	90.4615	0	0	0	6	0	10	22	14	0	0	0	0
2250	3	8.99	71.54	0	2	0	104	23	15.4036	6	597.273	746.591	20	0	0	2494.15	7	1	0	2	4	0	6	27	10	0	0	0	1
10636.4	3	9.17	286.92	0	0	4	4	3	11.6591	0	622.727	674.621	20	0	0	6385.85	23.6923	0	0	4	5	0	12	25	13	0	3841	1152.3	0
7090.91	3	13.59	203.88	1	2	0	61	31	12.6818	1	613.636	767.045	13	0	0	6539	62.3538	0	0	0	3	0	26	9	6	0	995	99.5	0
8140.91	3	15.31	346.44	1	2	0	412	13	34.2982	0	763.636	954.545	8	0	0	19903.8	53.2	0	0	3053	4	0	3	9	5	3	1682	168.2	0
14545.5	3	14.883	543.2	1	0	0	17	13	7.08182	0	741.818	927.273	7	0	0	11193.2	35.8846	1	0	21029	6	0	0	8	5	2	2200	660	0
15454.5	5	25.83	507.28	0	2	4	38	21	8.27273	0	609.091	761.364	8	0	0	2861	49.9615	0	0	4	5	0	7	13	9	2	5966	1789.8	0
20000	5	23.639	546.6	0	2	0	34	18	11.8145	0	720	780	7	0	0	8376.92	69.7846	0	0	268	4	0	1	5	3	2	8456	845.6	0
16363.6	5	13.67	461.96	1	2	0	33	22	14.3509	0	659.091	823.864	8	1	1	1495.38	13.8	0	0	0	2	0	7	8	6	0	0	0	0
14000	5	14.014	316.69	0	0	0	163	21	10.6	1	685	799.167	18	1	1	18901	28.1	0	0	0	10	0	6	30	22	5	4795	0	0
10909.1	5	8.129	239.83	1	1	5	124	13	21.73	0	654.545	709.091	19	0	0	5108.31	10.1	0	0	6	2	0	6	32	24	0	0	0	0
10000	5	18.18	266.06	1	1	0	129	30	32.4655	0	720	900	6	0	0	14567.3	95.6	1	0	0	3	0	5	3	3	0	0	0	0
11818.2	3	21.472	369.2	1	0	5	97	12	8.79273	0	613.636	715.909	4	0	0	11494	95.2	0	0	65	3	0	0	6	4	3	1418	141.8	0
24000	5	10.42	514.91	0	2	5	238	22	5.20364	0	720	900	15	1	1	4550.77	11.5231	1	0	6	6	0	9	15	7	3	8162	2448.6	0
7272.73	3	7.362	251.36	1	0	0	399	37	10.76	0	675	731.25	18	4	1	7362	35.7	0	0	0	12	0	3	23	12	0	0	0	0
9000	3	12.141	305.38	2	2	4	50	13	14.52	0	556.364	695.455	2	1	1	9768	57.5	0	0	4	2	0	4	9	4	0	0	0	0
18181.8	3	6.633	608.72	2	1	3	726	0	7.24545	0	731.818	792.803	11	0	0	3641.08	3.96923	0	0	3	3	0	5	9	8	0	0	0	0
11000	3	14.65	379.44	2	1	0	326	17	17.54	1	730.909	913.636	11	0	0	11455.4	62.1385	1	0	0	4	0	8	26	12	0	0	0	1
5454.55	3	14.069	167.97	1	1	0	539	42	15.5127	0	720	840	4	0	0	5760	56.5385	0	0	0	2	0	4	5	4	0	0	0	0
16363.6	5	10.439	314.96	0	1	4	48	10	11.6182	1	600	750	9	1	0	127698	83.4615	1	0	4	5	0	11	13	3	0	0	0	0
6000	3	13.491	190.64	1	1	7	191	5	9.45455	0	640.909	801.136	3	0	0	1135.38	51.6	0	0	8	2	0	2	3	1	0	0	0	0
2618.18	3	21.15	90.61	2	0	7	124	13	15.8836	0	670	781.667	18	0	0	15744	52.8462	1	0	2158	11	0	6	23	8	0	0	0	0
3550	3	17.86	128.1	0	0	0	123	12	14.84	0	675	787.5	7	1	0	1490.46	38.6769	0	0	0	4	0	4	4	1	0	0	0	0
2454.55	5	28.413	89.52	1	2	3	116	14	3.82091	0	560.455	700.568	3	0	0	3698.77	78.6	1	0	2112	3	0	0	3	2	0	0	0	0
5454.55	3	13.189	199.26	0	1	2	266	31	30.05	0	670	781.667	13	0	0	3183.69	57.6923	0	0	5	4	0	8	17	14	0	0	0	0
22727.3	3	15.389	854.32	0	1	0	328	3	27.9927	0	560.455	607.159	14	0	0	28222	51.1385	0	0	0	8	0	8	21	17	0	0	0	0
32727.3	5	12.303	692.93	0	1	0	191	5	15.2182	0	715	774.583	15	0	0	78705	73.3	0	0	0	8	0	11	21	10	0	0	0	0
11090.9	3	18.205	432.24	1	1	4	56	8	13.0991	0	695	810.833	8	0	0	8773	93.5846	1	0	4	6	0	3	6	5	0	0	0	0
2272.73	3	7.777	77.28	1	0	4	499	13	19.4273	0	878.182	1097.73	17	0	0	5464.62	9.23077	0	0	4	7	0	1	31	19	0	0	0	1
7090.91	3	11.55	198	1	2	4	127	13	12.4091	0	618.182	772.727	4	1	1	1893	72.8	0	0	71	3	0	2	9	7	0	0	0	0
7272.73	3	20.933	293.37	0	2	0	618	46	51.6109	1	604.545	654.924	22	0	0	10206	70.0385	1	1	0	14	0	29	37	15	0	0	0	1
8181.82	3	13.59	254.85	0	1	4	316	26	26.24	0	600	650	10	0	0	8791	66.1	0	0	4	4	0	8	12	9	0	0	0	0
13000	3	5.32	331.27	2	1	5	314	0	14.9364	1	627.273	679.545	8	0	0	13247.3	44.3077	0	0	6	4	0	6	14	10	0	0	0	0
10636.4	3	8.18	408.46	0	0	0	209	21	26.88	1	640.909	694.318	8	0	0	6619.38	40.1	0	0	0	4	0	5	10	5	0	0	0	0
30000	5	13.662	673.72	1	1	1	161	14	0.854545	0	686.364	743.561	7	0	0	1248.15	3.69231	1	0	2190	5.69049	0.00142201	8.4678	14.659	8.09808	0	0	0	0
4000	3	8.496	128.02	0	0	0	448	24	3.96	0	540	630	9	0	0	3944.77	18.1846	0	0	0	4	0	3	11	6	0	0	0	0
20761.4	5	20.889	658.11	1	2	0	138	0	16.01	2	670	837.5	17	0	0	6614	109.631	0	0	0	3	0	32	15	7	0	0	0	0
30545.5	3	7.348	860.47	0	1	0	167	8	9.74545	1	823.636	1029.55	31	0	0	6190.15	6.34615	1	0	0	10	0	12	34	24	0	0	0	0
8477.27	3	11.565	313.53	0	2	0	163	21	33	0	585	731.25	10	0	0	22736	112.269	1	0	228	4	0	10	11	6	0	0	0	0
2454.55	3	16.841	104.46	0	2	8	211	19	14.2609	0	568.636	663.409	8	0	0	4811	35.8154	1	0	22929	2	0	15	20	12	0	0	0	0
12743.2	5	13.99	362.33	1	2	4	342	21	30.6	0	675	787.5	9	0	0	37981	67.7308	1	0	4	5	0	13	10	9	0	0	0	0
8181.82	3	7.89	312.86	1	0	0	138	0	8.79273	1	548.182	685.227	7	0	0	6278.46	94.7308	0	0	0	3	0	23	4	2	0	0	0	0
8727.27	3	11.99	265.68	2	0	4	565	14	21.7364	0	700	816.667	8	0	0	13637.3	78.6154	1	0	22855	4	0	3	15	8	0	0	0	0
7386.36	3	13.67	212.61	0	0	0	156	18	17.97	0	552.273	644.318	10	0	0	16648.8	69.8769	1	0	33180	5.69049	0.00142201	8.4678	14.659	8.09808	0	0	0	0
8727.27	3	12.683	263.93	0	1	9	782	15	18.1718	1	618.182	721.212	7	0	0	19316.8	77.8615	0	0	10	3	0	2	17	10	0	0	0	0
25090.9	5	17.091	715.81	0	2	0	250	37	25.71	0	715	774.583	10	0	0	18186	63.7538	0	0	0	6	0	4	7	2	0	0	0	0
7272.73	3	8.253	255.04	0	0	0	226	21	15.4636	0	540	675	6	1	1	12676	68.6538	0	0	0	4	0	2	10	9	0	0	0	0
11863.6	5	15.813	273.62	1	2	0	255	9	20.58	0	548.182	685.227	5	1	1	3700.62	44.3077	1	0	0	3	0.00142201	8	21	15	2	4759	0	0
6954.55	3	15.939	263.29	0	1	4	19	14	36.6	0	710	887.5	7	0	0	22054.6	42.4615	0	0	4	3	0	6	6	4	0	2216	221.6	0
7854.55	3	16.489	332.75	1	0	4	489	30	16.1891	0	670	725.833	8	0	0	10255.4	82.1538	1	0	4	8	0	0	14	11	3	4077	1223.1	0
7636.36	3	7.99	219.33	2	0	5	120	21	23.33	0	568.636	663.409	16	0	0	35435.1	54.2769	1	0	6	8	0	17	22	9	3	1627	488.1	0
3736.36	3	24.99	136.16	0	1	0	0	0	17.88	3	600	650	10	0	0	12043.2	102.954	1	0	0	4	0	13	6	4	0	0	0	0
20000	3	10.99	654.68	0	2	0	48	10	15.6273	0	597.273	647.045	10	0	0	39385.2	89.9231	1	0	0	3	0	10	9	4	3	7692	0	0
21272.7	3	14.049	629.37	0	0	0	134	8	12.5182	0	741.818	803.636	9	0	0	15564	74.4	0	0	0	5	0	6	12	2	2	6829	2048.7	0
10600	3	10.076	337.87	0	0	0	348	18	21.3909	0	807.273	874.545	10	0	0	10114.5	36.4	0	0	0	4	0	17	11	1	3	666	66.6	0
13636.4	3	10.791	498.15	1	2	4	143	8	13.7018	0	540	675	10	0	0	14132.3	74	0	0	4	7	0	4	11	6	3	445	44.5	0
20000	3	15.389	683.46	1	1	0	275	8	18.91	1	710	828.333	8	1	1	8076.92	81.5769	1	0	0	4	0	14	11	6	0	0	0	0
18181.8	3	17.138	699.01	1	2	0	143	8	21.52	0	741.818	927.273	8	0	0	14412.7	97.3538	1	0	0	5.69049	0.00142201	8.4678	14.659	8.09808	1	1062	318.6	0
2727.27	3	13.65	85.02	0	0	0	500	27	3.98455	1	725	785.417	18	0	0	10534.5	29.4462	0	0	0	5	0	5	32	18	1	605	60.5	1
15363.6	3	15.31	452.63	0	0	4	273	8	17.4727	1	618.182	721.212	17	0	0	1480.62	23.4231	1	0	4	2	0	23	14	10	0	0	0	1
15000	3	8.789	469.98	1	0	0	25	13	25.2873	0	807.273	941.818	15	0	0	19528.6	35.7	0	0	0	3	0	4	13	6	3	4870	974	0
15272.7	5	14.049	405.08	1	2	0	66	14	25.4127	1	568.636	710.795	26	1	1	13673	49.9	0	0	0	7	0	34	15	8	0	0	0	1
18181.8	3	15.389	683.46	1	1	0	62	13	12.3091	3	680	793.333	4	0	0	5788	82.5	1	0	0	3	0	3	6	4	3	5869	0	0
23636.4	3	10.296	658.95	0	1	0	616	0	16.0636	0	552.273	598.295	7	0	0	25564	63.6	1	0	0	5	0	5	13	8	3	8064	2419.2	0
7000	3	10.989	225.84	2	0	3	53	19	11.04	0	769.091	961.364	8	0	0	3645	56.0769	0	0	3	4	0	6	6	4	3	1622	162.2	0
28363.6	5	17.27	599.96	1	1	0	177	26	17.1055	0	600	750	18	0	0	20116	84.3692	0	0	0	7	0	13	16	11	1	1327	265.4	0
14181.8	5	10.503	264.94	0	1	0	119	0	14.5	1	670	781.667	7	0	0	31098.5	96.9	1	0	0	3	0	12	5	4	0	0	0	0
10000	3	11.99	332.1	0	0	0	205	8	11.7055	0	544.091	589.432	8	1	1	8108.31	52.6154	1	0	0	5	0	5	15	5	0	3918	783.6	0
12572.7	5	16.115	272.07	1	2	0	8	6	17.7545	0	548.182	639.545	18	1	0	10756.6	52	0	0	0	10	0	5	30	15	3	4277	1283.1	0
16363.6	3	11.99	498.15	1	2	0	308	0	18.6655	0	645.455	806.818	14	0	0	14100	92.7692	0	0	0	9	0	5	15	13	1	4748	949.6	0
26300	3	16.686	957.95	0	1	0	94	27	32.5309	0	670	725.833	16	0	0	36594.9	74.7	1	0	0	10	0	12	25	15	3	6704	670.4	0
5909.09	3	16.489	173.31	1	1	0	116	14	13.8927	0	560.455	700.568	10	2	0	3487.08	59.1692	1	0	0	5	0	14	13	8	3	867	86.7	0
10909.1	3	9.891	392.81	0	0	4	265	7	43.08	0	790.909	988.636	20	1	0	19348	29.2923	1	0	4	4	0	25	19	10	2	4633	463.3	0
6000	3	12.591	205.04	2	1	0	397	35	20.6727	1	725.455	846.364	10	1	0	8431.15	68.3	1	0	0	6	0	6	26	14	3	1324	264.8	0
13090.9	3	11.691	404.27	1	1	0	387	19	11.65	0	609.091	710.606	4	0	0	4659.69	92.1846	0	0	0	2	0	4	2	1	3	1786	357.2	0
18000	3	9.17	573.83	0	1	0	9	7	17.38	0	741.818	865.455	13	0	0	32850	78.2	1	0	0	9	0	5	13	9	1	1138	113.8	0
9000	3	7.579	277.45	0	0	4	750	2	23.5718	0	856.364	999.091	15	0	0	23148	21.8	0	0	4	11	0	6	27	12	3	2026	0	1
8727.27	3	12.089	261.88	0	0	0	853	39	27.1	0	665	775.833	7	0	0	6333.23	87.9846	1	0	0	5	0	2	8	4	0	0	0	1
8181.82	3	7.139	229.84	2	0	4	469	27	17.65	0	585	633.75	15	1	1	8165.54	51.3231	0	0	4	3	0	13	6	2	3	2168	0	0
5325	3	19.327	191.37	1	1	0	259	19	14.8145	0	548.182	593.864	12	1	1	1234	25.8462	1	0	0	6	0.00142201	8	14	7	0	0	0	0
9818.18	3	6.49	275.81	2	1	4	25	13	19.83	0	654.545	709.091	7	0	0	156806	18.5769	0	0	4	5	0	4	14	8	3	3237	971.1	0
13090.9	3	18.49	436.79	1	0	12	139	8	5.36364	0	758.182	947.727	6	0	0	6489	61.8462	0	0	46	6	0	2	11	9	1	4109	410.9	0
18568.2	3	10.087	651.13	0	1	0	185	3	9.97	0	609.091	761.364	5	0	0	26203.8	81.8769	1	0	0	4	0	3	10	5	0	0	0	0
31818.2	5	23.67	1054.15	2	1	0	4	3	14.18	2	675	843.75	6	0	0	30865.4	64.1	0	0	0	4	0	3	9	3	0	0	0	0
10400	3	7.139	318.71	1	0	0	236	7	34.92	0	785.455	916.364	15	0	0	11653	24.6	0	0	0	8	0	13	18	11	0	0	0	0
5000	3	8.091	158.98	1	0	4	157	8	8.99091	0	613.636	715.909	11	2	2	6853.85	21.6923	0	0	4	5	0	5	25	12	0	0	0	0
12375	3	16.425	448.94	1	0	5	166	8	20.1491	0	741.818	927.273	12	0	0	10340.6	75.7846	1	0	38	7	0	7	9	8	0	0	0	0
10118.2	3	14.895	328.61	0	1	0	53	19	14.9455	0	631.818	789.773	7	0	0	1777	23.6923	1	0	0	5	0.00142201	4	6	3	0	0	0	0
24545.5	5	12.29	671.74	1	1	0	5	4	9.43364	1	560.455	607.159	3	0	0	22795.2	88.3077	0	0	0	2	0	17	7	4	0	0	0	0
6700	3	15.906	230.49	1	0	0	353	30	13.1345	0	725.455	846.364	11	1	1	10577.5	66	1	0	0	10	0.00142201	3	20	13	0	0	0	0
23400	3	10.087	745.97	1	1	5	468	0	30.3927	0	823.636	892.273	26	0	0	12964.6	21.3	1	0	6	5	0	20	33	12	0	0	0	0
25090.9	3	8.459	717.46	2	1	0	161	14	5.73818	0	796.364	929.091	17	0	0	25398	29.6154	0	0	0	8	0	3	42	20	0	0	0	0
8000	3	12.617	263.7	0	1	4	141	13	9.36364	1	600	750	10	1	1	7551.38	43.1077	0	0	4	5	0	8	14	5	0	0	0	0
6545.45	3	7.99	188	1	0	0	134	8	4.60909	0	705	763.75	7	0	0	9912	39.3077	0	0	0	4	0	6	7	5	0	0	0	0
27272.7	5	17.56	628.87	0	2	0	0	0	12.3273	0	609.545	660.341	7	0	0	13238.6	80.4923	1	0	299	4	0	3	5	3	0	0	0	0
11818.2	3	6.489	309.74	0	1	0	157	8	18.5	0	700	816.667	19	0	0	45764.9	76.9615	0	0	0	5	0	14	16	11	0	0	0	0
16363.6	5	21.18	407.33	1	2	4	64	14	29.13	0	609.091	710.606	18	0	0	17334.5	44.3077	0	0	2	15	0	6	24	18	0	0	0	1
13090.9	5	10.99	260.85	0	0	0	245	26	8.73818	1	572.727	715.909	10	0	0	6177.23	35.7692	0	0	0	3	0	9	19	10	0	0	0	0
6293.18	3	12.897	182.86	1	2	0	620	8	28.4909	0	618.182	772.727	8	0	0	12116.5	75.2308	1	0	34378	6	0	5	12	5	0	0	0	1
7636.36	3	13.189	232.47	1	1	7	223	12	19.4364	0	622.727	674.621	16	0	0	11222	60.4615	1	0	8	12	0	9	22	10	0	0	0	0
9818.18	3	7.97	375.88	0	1	2	837	40	23.1709	0	735	918.75	7	0	0	5547	16.6154	0	0	5	3	0	10	8	8	0	0	0	0
25454.5	3	5.32	843.22	0	1	2	63	14	4.17	0	663.636	774.242	13	0	0	5805.69	9.34615	0	0	5	2	0	7	12	8	0	0	0	0
18181.8	3	11.691	673.79	0	1	0	104	23	11.7245	0	774.545	839.091	8	1	0	4898.08	20.1231	0	0	0	5	0	12	16	7	0	0	0	0
10909.1	3	9.064	314.48	0	0	0	26	18	3.70636	0	609.091	710.606	9	2	2	11558.8	58.5	0	0	0	3	0	10	5	4	0	0	0	0
14181.8	3	6.408	371.19	2	0	4	628	24	29.1182	0	668.182	779.545	23	0	0	13490.6	49.1	0	0	4	4	0	29	10	3	0	0	0	1
7636.36	3	13.66	238.09	0	1	0	835	35	22.3309	0	725.455	846.364	9	0	0	7199.23	102.808	1	0	0	5	0	3	13	8	0	0	0	0
8727.27	3	8.253	255.04	0	2	0	455	13	21.5564	0	680	850	16	0	0	21776.5	59.0769	0	0	0	8	0	18	15	5	0	0	0	0
6500	3	11.466	218.2	2	2	0	473	8	21.8455	0	710	887.5	30	1	1	13250.8	29.6154	1	0	0	15	0	11	34	15	0	0	0	1
4909.09	3	7.11	187.75	2	0	0	160	4	20.16	0	730	912.5	10	0	0	10931.8	29.0769	1	0	28	5	0	9	7	3	0	0	0	0
28000	3	9.93	902.57	1	1	4	134	8	9.61364	0	580.909	677.727	20	0	0	25811.5	25.1077	1	0	4	8	0	27	27	13	0	0	0	0
16000	5	15.389	372.21	1	1	0	418	45	10.0391	0	755	817.917	9	0	0	2428	13.0308	0	0	0	5	0	5	8	2	0	0	0	0
12272.7	5	9.576	323.45	0	1	4	42	26	12.1727	1	564.545	658.636	6	0	0	38777.5	91.5	0	0	4	4	0	2	14	8	0	0	0	0
15000	5	13.33	343.84	0	2	0	230	2	21.3491	0	750	937.5	16	0	0	20145	29.0769	0	0	0	6	0	7	21	8	0	0	0	1
24818.2	3	12.837	752.05	0	2	4	336	44	18.29	0	589.091	638.182	8	1	1	7936	37.1538	1	0	4	2	0	18	9	4	0	0	0	0
28000	5	9.135	596.99	0	1	0	271	35	16.1264	0	785.455	981.818	9	0	0	51983	88	1	0	0	4	0	7	9	6	0	0	0	0
7445.45	3	13.58	214.04	1	1	4	498	32	18.1391	0	613.636	664.773	8	0	0	4704.23	51.0462	0	0	4	2	0	12	11	4	3	1416	141.6	1
13090.9	3	15.381	571.17	1	2	0	13	10	33.9727	0	540	630	26	0	0	12120	48.9	0	0	0	6	0	18	11	5	3	5647	0	1
8500	3	17.991	347.44	0	2	0	51	13	26.2	2	660	770	10	0	0	7902.46	60	0	0	0	7	0.00142201	6	15	8	0	0	0	0
6000	3	16.29	211.81	1	1	5	136	8	2.02727	0	710	769.167	5	0	0	3033.23	22.0769	1	0	6	4	0	0	7	4	0	1108	110.8	0
31818.2	5	20.889	907.73	0	2	0	616	0	16.1591	0	576.818	721.023	18	0	0	34579	72.1538	0	0	0	7	0	10	22	11	1	3900	1170	0
11818.2	3	11.14	328.06	1	0	3	141	13	17.2145	0	640.909	801.136	15	0	0	20063	63.4154	0	0	2461	12	0	2	21	18	3	2123	424.6	1
21000	5	19.305	573.45	0	2	2	404	22	27.2291	0	752.727	878.182	11	1	0	16947.5	61.1692	0	0	5	6	0	14	11	7	0	0	0	0
4909.09	3	7.282	184.23	1	2	0	221	8	20.37	0	672.727	840.909	14	0	0	36977.2	46.8	1	0	193	5.69049	0.00142201	8.4678	14.659	8.09808	1	1272	254.4	0
6500	5	19.316	163.51	1	1	0	261	8	13.2455	0	548.182	639.545	13	0	0	13962.3	89.3538	1	0	14440	5.69049	0.00142201	8.4678	14.659	8.09808	0	1317	131.7	1
12272.7	5	20.889	389.03	0	1	0	432	10	8.10818	0	720	840	6	3	0	9219.54	78.2769	0	0	0	4	0	6	4	2	0	0	0	0
35863.6	3	6.408	1016.89	0	2	4	170	23	28.1018	0	597.273	647.045	17	0	0	38068.8	48.1846	1	0	4	10	0	16	23	15	0	9302	930.2	0
13090.9	5	18.139	294.96	1	2	0	387	19	18.1455	0	604.545	654.924	10	1	1	5448.92	38.5538	1	0	0	8	0	5	16	8	0	0	0	0
16118.2	5	11.99	438.12	0	1	0	841	42	19.9	0	613.636	767.045	10	0	0	11440	42	1	0	193	5.69049	0.00142201	8.4678	14.659	8.09808	0	0	0	0
17668.2	3	18.205	529.67	1	1	0	27	12	26.76	0	741.818	865.455	12	2	0	18223.8	55	1	0	0	10	0	6	10	5	2	2410	241	0
8181.82	5	23.43	284.39	0	1	3	404	22	23.1273	0	752.727	878.182	9	0	0	2728.85	39.8462	0	0	3	6	0	5	8	4	0	0	0	0
3000	3	14.99	103.99	0	0	0	630	0	20.2255	0	609.091	659.848	8	0	0	6222.46	114.923	1	0	0	2	0	10	7	3	3	1259	0	0
5236.36	3	12.672	164.24	2	1	2	517	14	11.4	0	769.091	961.364	13	0	0	2589.23	11.6308	0	0	5	3	0	9	10	8	3	470	141	1
27272.7	3	16.489	866.52	0	2	4	418	45	14.6782	0	665	775.833	14	0	0	79104.9	72.6923	0	0	4	11	0.00142201	9	27	17	0	697	139.4	0
6363.64	3	12.897	240.37	0	0	5	361	8	31.9636	0	695	810.833	8	1	1	6260	70.1538	0	0	173	3	0	11	8	4	3	2828	0	0
5181.82	3	6.291	175.98	1	0	0	646	8	9.71182	0	650	812.5	9	0	0	3930.46	17.3538	0	0	0	3	0	9	12	5	3	2511	251.1	0
6381.82	3	11.421	261.65	1	2	5	639	37	6.91636	0	618.182	772.727	9	1	1	5579.54	34.5	0	0	6	5	0	2	13	10	0	0	0	0
17727.3	3	17.622	527.51	1	2	0	226	21	23.3818	0	700	875	16	0	0	107195	44.5846	0	0	0	7	0	11	18	6	2	4872	487.2	0
11818.2	3	6.49	306.45	0	0	0	42	26	18.4727	0	834.545	1043.18	21	0	0	39675	23.6308	0	0	0	13	0	1	44	26	3	3598	719.6	1
32618.2	5	21.428	723.27	1	1	0	212	7	38.24	0	741.818	927.273	9	0	0	46061.5	78.3462	0	0	0	6	0	12	18	9	0	0	0	0
24545.5	5	12.62	676.78	0	1	0	161	14	29.11	0	740	801.667	18	0	0	12463	18.9231	0	0	0	7	0	18	18	6	4	9511	0	1
7272.73	3	5.841	245.16	1	0	4	519	9	17.6155	0	763.636	954.545	19	0	0	31473.2	64.9	1	0	4	5	0	28	8	6	3	2962	888.6	1
13709.1	3	10.91	379.28	2	2	0	97	12	14.4327	2	747.273	809.545	12	0	0	17058.5	76.2	0	0	0	7	0	7	17	5	3	4503	450.3	0
6443.18	3	15.906	270.92	0	1	0	176	3	28.56	0	752.727	940.909	7	0	0	5475.69	77.0769	0	0	0	3	0	6	9	4	1	2974	892.2	0
7854.55	3	8.9	304.84	0	1	2	524	20	8.14	0	823.636	892.273	11	0	0	12501.9	71.4231	0	0	5	3	0	7	17	8	0	4495	0	0
35000	5	10.75	756.63	0	1	0	573	19	16.8464	0	807.273	874.545	16	0	0	49854	60.7	0	0	0	8	0	7	14	5	5	14899	0	0
12175	5	17.57	306.33	0	2	0	781	40	18.7855	0	560.455	607.159	12	0	0	13050.5	39.4	0	0	0	6	0	15	16	9	2	5313	0	1
4545.45	5	11.418	107.18	1	0	10	100	4	16.4273	0	621.818	673.636	6	0	0	9919.54	82.2	1	0	63	5.69049	0.00142201	8.4678	14.659	8.09808	0	0	0	1
16363.6	3	11.67	661.14	0	2	0	41	25	4.83545	2	600	650	12	0	0	17156.5	91.6	1	0	0	7	0	9	15	9	3	7517	751.7	0
17454.5	3	13.266	552.59	1	0	0	25	13	7.47	0	741.818	803.636	14	0	0	20118.5	82.9615	1	0	307	5.69049	0.00142201	8.4678	14.659	8.09808	1	5069	506.9	0
23636.4	5	13.06	455.68	0	0	4	467	5	28.6691	0	677.273	790.152	17	0	0	16404	19.9385	0	0	4	4	0	25	19	12	0	0	0	0
12727.3	3	15.906	481.63	1	0	0	0	0	35.9673	0	747.273	809.545	16	0	0	18905.8	56.7	0	0	0	8	0	7	18	14	0	4300	860	0
16363.6	3	15.037	680.36	1	2	0	120	21	30.24	0	720	900	50	1	1	27786	38.1231	0	0	0	17	0	29	46	22	0	5242	0	1
7327.27	3	8.244	197.63	0	2	4	15	12	13.5327	1	600	700	9	0	0	6189.23	58.1538	0	0	4	5	0	10	9	5	3	1004	0	0
26000	5	14.895	541.45	1	1	4	272	26	16.5818	0	730.909	852.727	8	0	0	29628	63.8077	0	0	4	6	0	8	12	8	4	4805	961	0
17520.5	3	13.332	493.26	1	2	0	79	2	16.8	0	560.455	607.159	14	0	0	16894.8	83.9	1	0	22313	5.69049	0.00142201	8.4678	14.659	8.09808	3	59	0	1
36363.6	3	5.32	1204.6	0	1	6	830	27	0.54	0	750	875	9	0	0	4472.46	4.84615	0	0	7	3	0	12	16	8	2	56	11.2	0
16000	3	9.49	512.46	0	0	2	832	24	0.23	0	679.091	848.864	7	0	0	1589.54	2.53846	0	0	5	2	0	0	11	8	3	7901	790.1	0
3272.73	3	9.441	130	1	0	4	137	32	19.91	0	700	816.667	4	0	0	4128	98.3	1	0	4	2	0	44	3	2	3	1756	351.2	0
43636.4	3	7.191	1253.28	0	1	0	221	8	6.33	0	769.091	897.273	20	0	0	41951.1	26.3846	1	0	0	12	0	8	21	13	2	8240	2472	0
22454.5	3	9.17	605.7	1	0	4	143	8	18.4991	0	763.636	954.545	19	0	0	20221	53.8	1	0	4	6	0	19	13	10	2	3988	0	0
17454.5	3	17.589	562.44	1	2	0	31	2	20.1436	0	675	731.25	17	0	0	21139	64.1538	0	0	0	12	0	9	23	8	0	0	0	0
9000	3	13.189	298.89	0	1	0	288	13	13.44	1	690	862.5	11	0	0	10331	80.6615	0	0	0	5	0	6	10	5	1	3202	960.6	0
5454.55	3	8.998	188.52	2	0	3	233	19	6.04364	0	593.182	692.045	9	0	0	4129	21.8077	1	0	3	2	0	9	13	10	3	509	101.8	0
10000	3	10.384	352.06	0	1	4	362	35	29.8455	0	645.455	753.03	18	0	0	18154.8	45.3462	0	0	4	9	0	13	26	12	3	4146	414.6	0
23372.7	3	25.821	894.23	0	2	3	106	12	17.7364	1	747.273	934.091	8	0	0	23485	54	1	0	3	6	0	4	9	9	0	3415	341.5	0
14400	5	8.82	304.55	0	0	0	608	0	12.8836	0	630	787.5	11	0	0	2029.62	13.7846	0	0	0	5	0	7	14	8	4	6266	1253.2	0
4545.45	3	12.285	170.04	1	2	0	171	8	27.2364	0	675	787.5	12	0	0	24097	90.9	0	0	0	6	0	13	18	11	1	2308	230.8	0
9000	3	12.582	307.52	2	0	0	391	0	24.8182	2	670	837.5	12	0	0	5892.92	18.0923	1	0	0	9	0	9	20	17	3	2042	612.6	1
11818.2	3	6.03	304.36	0	0	0	107	30	11.6836	0	666.818	833.523	9	0	0	14420	21.2308	1	0	17538	2	0	7	26	12	0	939	281.7	0
5522.73	3	18.997	217.41	1	0	0	335	8	14.4	0	680	793.333	7	1	1	7500.77	78.3	0	0	49434	5	0	3	8	1	0	0	0	0
4200	3	9.8	135.13	1	1	9	529	23	30.0764	5	720	900	13	0	0	23074	55.7538	0	0	10	4	0	13	17	6	3	563	0	0
30545.5	3	8.19	879.88	0	1	0	352	11	7.26	2	681.818	795.455	12	10	0	8140.62	21.9692	0	0	0	4	0	11	18	6	3	8614	1722.8	0
10909.1	3	7.392	307.5	0	0	4	692	9	6.47182	0	638.182	744.545	8	0	0	8966.46	17.2308	0	0	4	3	0	5	19	13	3	4011	401.1	0
9818.18	5	10.99	260.85	1	2	0	126	38	23.04	0	747.273	934.091	30	0	0	15878.1	37.1538	0	0	0	11	0	6	46	15	0	0	0	1
27272.7	3	11.358	1005.34	1	2	9	436	8	17.1491	0	675	843.75	23	0	0	33041.5	92.7692	0	0	10	9	0	21	17	11	0	0	0	0
10636.4	3	11.53	296.92	1	2	0	359	43	24.5091	0	631.818	684.47	11	0	0	10564.6	57.1154	0	0	0	8	0	5	14	10	2	144	28.8	0
14545.5	3	16.489	554.57	1	1	4	19	14	13.8109	0	680	736.667	11	0	0	14030.8	47.6	1	0	4	9	0	3	16	10	3	6904	0	0
21272.7	3	8.18	565.56	1	0	0	309	30	25.3455	0	572.727	715.909	20	0	0	20760.9	43.2923	0	0	0	6	0	28	9	6	3	6372	637.2	0
21818.2	3	9.819	653.93	0	0	4	319	0	8.41	0	636.364	742.424	9	0	0	8475.69	15.2	0	0	4	3	0	3	17	13	0	0	0	0
30000	5	16.29	734.18	1	2	0	167	8	22.53	0	758.182	947.727	10	0	0	34086	69.4154	1	0	28	5	0	8	15	9	0	0	0	0
23636.4	5	10.791	444.79	1	1	0	32	21	15.9927	0	585	731.25	5	0	0	13642	50.5077	0	0	0	4	0	7	10	4	0	0	0	0
7090.91	3	21.98	229.09	1	0	0	230	2	17.52	0	544.091	634.773	9	1	1	10281.9	67.6308	1	0	106	7	0	3	8	4	3	2212	221.2	0
5318.18	3	5.852	195.75	0	1	4	52	19	1.8	0	650	704.167	13	0	0	3006.46	7.10769	0	0	4	4	0	7	19	14	3	2632	263.2	0
818.182	3	13.18	33.79	1	2	7	265	7	25.4727	1	604.545	705.303	23	2	1	17847.7	65.8846	1	0	8	15	0	19	26	13	3	82	16.4	0
13090.9	3	11.55	396	0	2	0	171	8	1.60909	0	752.727	878.182	6	0	0	7084.62	42.2769	1	0	0	4	0	0	5	3	3	5244	1048.8	0
20454.5	5	16.254	635.66	1	1	3	215	8	9.5	0	540	585	12	1	1	15.0769	0.230769	0	0	3	1	0	14	25	19	0	0	0	0
8727.27	3	8.253	255.04	2	0	5	243	13	26.4	0	654.545	818.182	6	0	0	10877.5	88.0923	0	0	6	3	0	6	3	3	3	1951	390.2	0
18777.3	5	10.395	505.31	0	2	0	324	10	21.2182	0	654.545	763.636	12	0	0	13868.6	32.9538	1	0	0	3	0	6	17	9	0	0	0	0
6545.45	3	11.44	197.69	0	0	0	388	3	10.8818	0	690	805	6	1	1	6349.54	72.5538	1	0	0	3	0	3	4	2	0	0	0	0
13000	3	7.89	344.15	1	1	0	362	35	21.4455	0	544.091	634.773	7	2	0	9477	61.5	0	0	0	4	0	5	10	5	0	0	0	0
20454.5	3	7.371	785.61	2	1	0	32	21	27.26	1	730	790.833	10	0	0	18518.1	33.6923	0	0	0	6	0	4	17	12	0	0	0	0
8272.73	3	6.858	218.13	0	2	0	286	16	13.0364	0	700	875	13	0	0	15082	22.1538	0	0	0	11	0.00142201	3	23	7	0	0	0	0
17454.5	3	8.69	500.65	1	2	4	403	38	24.5018	0	755	943.75	9	0	0	6674.77	29.1923	1	0	59929	5.69049	0.00142201	8.4678	14.659	8.09808	0	0	0	0
25454.5	3	9.339	883.77	0	1	4	283	44	23.6509	0	556.364	649.091	24	0	0	106486	45.2308	0	0	4	20	0.00142201	6	32	27	0	0	0	0
14000	3	19.866	557.22	0	2	0	14	11	38.9091	0	670	781.667	18	2	0	4174.15	35.3231	1	1	0	2	0	15	4	3	0	0	0	1
5454.55	3	10.323	197.78	1	1	0	521	24	13.94	0	747.273	871.818	10	1	0	3768	53.7	0	0	2	6	0	25	10	4	0	0	0	0
16363.6	5	19.19	468.82	0	2	0	355	18	16.4945	0	685	742.083	29	1	1	12032.3	41.5385	0	0	0	17	0.00142201	17	24	13	0	0	0	1
6545.45	3	12.089	196.41	0	2	4	79	2	6.25	0	604.545	705.303	9	4	2	6653.08	70	1	0	4	7	0.00142201	2	18	7	0	0	0	0
10909.1	3	14.11	410.75	1	2	5	390	13	6.55455	0	548.182	685.227	12	0	0	7887	40.0615	1	0	19777	5.69049	0.00142201	8.4678	14.659	8.09808	0	0	0	0
4545.45	3	6.864	152.66	1	1	4	403	38	9.18545	0	818.182	886.364	8	0	0	4706	13.2	0	0	4	4	0	1	7	6	0	0	0	0
35000	3	14.685	1185.2	0	1	0	227	35	13.1018	1	613.636	767.045	21	0	0	38758.5	83.8846	0	0	0	6	0	12	15	13	0	0	0	0
5890.91	3	11.691	242.57	1	1	0	79	2	19.18	0	552.273	644.318	8	2	0	5581.85	45.5769	0	0	0	5	0	4	7	5	0	0	0	0
25000	5	10.076	520.91	0	0	0	349	44	28.2655	0	758.182	821.364	7	0	0	40736.8	106.615	0	0	0	3	0	10	9	5	0	0	0	0
11286.4	3	20.405	347.9	2	2	0	116	14	24.3573	0	627.273	731.818	10	0	0	16660	77.3077	1	0	0	6	0	7	6	6	0	0	0	0
21113.6	5	14.661	568.38	0	1	0	371	7	15.6873	0	752.727	815.455	10	0	0	19794.2	43.8462	0	0	0	8	0	4	17	4	0	0	0	0
14545.5	3	5.93	486.25	0	0	4	337	14	10.66	0	556.364	602.727	15	0	0	50590.6	58.8923	0	0	4	11	0	15	20	11	0	0	0	0
8000	3	10.725	257.2	0	0	0	348	18	35.0836	0	736.364	859.091	16	0	0	20104.6	33.8769	0	0	0	8	0	7	20	8	0	0	0	0
5645.45	3	15.037	176.05	1	2	4	35	14	10.6909	0	552.273	644.318	4	0	0	8101.15	63.5077	1	0	4	4	0	0	5	4	0	0	0	0
4363.64	3	13.33	135.42	1	1	4	17	13	20.6264	0	589.091	736.364	10	0	0	3867	12.6462	1	0	4	7	0	0	13	10	0	0	0	1
35000	3	11.539	1137.43	1	2	0	167	8	18.0818	0	730.909	852.727	20	1	0	56781.9	56.2154	1	0	0	10	0	9	44	23	0	0	0	0
24000	3	5.852	722.76	0	2	5	53	19	6.76	0	736.364	859.091	10	0	0	21405	26.9231	0	0	6	3	0	13	30	17	0	0	0	0
3927.27	3	7.97	112.77	0	1	0	290	18	26.2582	1	572.727	668.182	22	0	0	32331.7	76.5	0	0	0	10	0	18	13	8	0	0	0	0
16363.6	3	10.087	478.19	2	2	0	28	12	6.03636	1	730.909	791.818	6	0	0	8581.85	46	1	0	0	5	0	0	8	5	0	0	0	0
8727.27	3	8.9	304.84	0	0	2	121	14	12.1255	0	601.364	751.705	12	1	1	3197.54	14.7	1	0	664	5	0	5	14	8	0	0	0	0
9818.18	3	14.069	403.12	1	1	0	134	8	6.45	0	720	900	6	1	1	7227.69	72.6923	1	0	0	3	0	4	8	4	0	0	0	0
13090.9	3	7.101	500.58	0	1	2	88	32	13.82	0	725	785.417	10	0	0	18389.5	42.6	0	0	5	6	0	9	8	4	0	0	0	0
16363.6	5	19.99	529.77	0	2	0	290	18	17.28	0	552.273	644.318	10	1	1	13697.3	81.5769	0	0	0	4	0	5	9	2	0	0	0	0
23754.5	3	15.61	702.8	0	2	0	606	4	8.62909	1	774.545	968.182	7	0	0	6436.62	14.6769	1	0	0	3	0	17	5	4	0	0	0	0
3840.91	3	9.99	136.31	0	0	0	237	32	16.49	0	740.909	926.136	17	0	0	4416.46	9.8	0	0	0	1	0	11	38	20	0	0	0	1
8161.36	3	24.99	396.56	2	2	0	307	14	14.9236	2	540	630	5	0	0	3394.15	65.2615	1	0	0	4	0	14	4	2	0	0	0	0
22386.4	3	13.33	833.64	0	1	0	301	21	17.6727	0	622.727	674.621	9	0	0	14078.8	52.8	0	0	0	7	0	3	9	3	0	0	0	0
22454.5	3	10.296	626.01	0	0	0	167	8	8.49	0	741.818	865.455	6	0	0	7281.23	56.4	1	0	0	3	0	8	9	4	2	5733	1719.9	0
8181.82	3	15.31	348.18	1	0	0	143	8	6.90545	0	785.455	981.818	7	0	0	7293	50.0769	0	0	0	4	0	2	9	8	0	0	0	0
8000	3	14.663	270.83	0	2	0	411	11	23.82	0	720	780	6	0	0	4492.62	67.0154	1	0	0	3	0	6	14	9	3	597	179.1	0
5625	3	15.763	236.08	1	1	0	196	14	7.24909	0	660	825	7	0	0	4059.23	44	1	0	0	5	0	8	5	3	3	1148	114.8	0
18731.8	3	19.52	585.18	0	2	0	353	30	24.3573	0	564.545	658.636	18	0	0	19293.5	37.9077	1	0	38	6	0	5	15	11	1	6087	1217.4	0
5909.09	3	7.371	157.13	0	0	8	27	12	17.59	1	660	770	8	0	0	10844.6	96.8077	1	0	9	7	0	1	10	8	3	1705	511.5	0
5000	3	18	185.82	1	0	0	197	4	4.58182	0	556.364	695.455	3	0	0	676.154	90.1846	1	0	0	1	0	2	2	2	0	0	0	0
24818.2	3	14.08	718.55	1	1	0	253	21	29.44	0	660	715	17	1	1	22756.5	65.6308	0	0	0	12	0	5	15	8	0	0	0	0
21818.2	3	11.99	664.2	0	0	4	348	18	18.1818	2	758.182	884.545	31	0	0	13137.4	17.5385	1	0	4	9	0	22	34	15	0	0	0	1
3272.73	3	14.949	101.94	1	0	0	124	13	10.8655	7	600	750	8	0	0	2105.54	15.9692	0	0	0	4	0	1	10	5	3	278	0	0
5000	3	16.24	194.02	1	0	4	74	30	28.9745	0	613.636	715.909	10	0	0	11252.8	53.6	0	0	4	5	0	6	7	3	2	773	77.3	1
11818.2	3	12.639	329.72	0	1	0	235	8	18.66	1	560.455	653.864	8	0	0	11417.5	89.9231	0	0	0	5	0	10	12	8	2	402	40.2	0
10472.7	3	19.646	346.39	1	2	5	340	14	6.58636	0	730.909	913.636	7	0	0	6035	33.7	0	0	6	4	0	0	7	4	3	3364	672.8	0
6545.45	3	6.228	185.05	1	0	0	9	7	18.0818	0	758.182	947.727	11	0	0	16249.7	67.7385	0	0	0	6	0	7	23	11	3	1386	277.2	0
5909.09	3	10.395	165	0	0	4	109	21	28.3636	1	560.455	700.568	6	0	0	5191	26.8	1	0	65	3	0	4	12	4	3	130	0	0
23977.3	3	21.109	969.34	0	1	2	97	12	20.1764	0	774.545	968.182	9	0	0	16385.8	73.1538	1	0	5	3	0	4	8	2	1	6565	1313	0
16363.6	3	8.253	478.19	0	1	5	175	14	17.16	0	763.636	890.909	7	0	0	600.923	53.9538	0	0	6	1	0	11	5	4	0	0	0	0
2045.45	3	9.441	81.25	1	0	0	52	19	9.31	0	685	856.25	4	1	0	870	30.9231	0	0	0	3	0	4	3	2	0	984	0	0
35454.5	5	15.61	723.34	1	1	4	400	17	14.8727	0	645.455	806.818	10	0	0	3753.23	17.8769	1	0	4	5	0	6	10	6	3	8599	859.9	0
25000	3	12.628	824.17	1	2	0	63	14	16.59	0	720	840	12	0	0	33090.6	81.5	0	0	0	7	0	5	19	8	1	345	69	0
27272.7	5	24.178	828.23	0	2	0	499	13	14.36	1	670	725.833	13	0	0	130581	91.8462	1	0	624	11	0	5	16	10	4	4942	494.2	0
7636.36	3	7.24	216.91	1	0	0	62	13	14.5818	0	681.818	795.455	18	0	0	8601.23	22.8308	0	0	0	7	0	21	16	12	2	2207	662.1	1
10000	3	15.61	349.65	1	0	0	275	8	19.3273	0	720	900	20	1	1	9401	74.3077	1	0	0	18	0.00142201	2	25	6	0	0	0	1
14000	3	13.11	472.46	1	2	0	195	38	13.7455	0	622.727	674.621	13	0	0	17130.6	80.6769	1	0	51110	13	0	2	15	12	1	6424	642.4	1
14181.8	3	16.24	423.31	1	1	1	505	10	20.3364	0	685	799.167	9	0	0	13115.8	53.8154	1	0	1	7	0	8	16	6	2	5544	1108.8	0
20209.1	5	20.205	688.53	1	2	0	660	23	27.3182	0	600	650	26	1	0	39145.1	84.3462	1	0	0	16	0	27	25	12	1	4048	404.8	1
19600	3	23.238	787.82	0	2	4	108	21	31.51	0	622.727	726.515	15	0	0	12206.8	40.2462	0	0	4	8	0	8	13	10	0	0	0	0
1636.36	3	9.79	63.51	1	2	0	514	13	19.9636	0	589.091	687.273	10	0	0	6265.85	28.6154	1	0	10606	6	0	0	10	8	2	381	76.2	1
6000	3	9.44	192.03	0	2	0	505	10	14.0545	0	544.091	634.773	6	0	0	6548.77	71.1846	0	0	0	5	0	2	20	9	3	1477	0	0
23636.4	3	8.679	625.72	0	1	4	238	22	19.4818	1	604.545	755.682	14	0	0	25668	89.9231	1	0	4	6	0	10	18	9	3	8707	2612.1	0
2750	3	20.064	99.76	2	2	0	36	13	35.1927	1	670	781.667	15	0	0	8712.31	42.8	1	0	0	6	0	8	21	12	0	0	0	0
12727.3	5	12.62	315.83	0	1	2	112	23	9.37273	0	645.455	699.242	6	1	1	0	0	0	0	5	0	0	10	22	11	0	5088	0	0
14890.9	5	15.543	314.98	0	2	0	157	8	18.4545	0	665	775.833	9	0	0	4306.15	89.6538	0	0	416	6	0	14	9	6	0	0	0	0
25000	3	13.959	838.63	0	1	0	359	43	19.9727	0	700	875	18	0	0	25344.3	55.1	0	0	0	13	0	1	30	10	2	11535	0	1
6545.45	3	5.852	240.92	0	2	0	51	13	4.09091	1	720	840	6	0	0	3183.46	13.6154	0	0	0	2	0	1	6	6	3	2057	411.4	0
7272.73	3	15.015	272.07	0	0	0	480	8	16.25	0	663.636	829.545	7	0	0	7245	81.5	0	0	0	5	0	1	9	6	2	2039	407.8	0
6972.73	3	7.551	185.95	1	0	0	167	8	7.76	0	640.909	801.136	4	0	0	8323	80.3077	0	0	0	4	0.00142201	0	5	5	3	2752	550.4	0
7272.73	3	13.33	270.83	1	1	5	676	0	29.46	1	790.909	856.818	16	0	0	1521.92	7.61538	0	0	6	3	0	18	12	6	3	1801	360.2	1
13090.9	5	11.358	360.95	1	0	4	54	28	24.3273	0	618.182	772.727	15	1	1	9025	23.9	0	0	4	4	0	12	27	12	1	7677	2303.1	0
14181.8	3	12.089	392.81	0	2	2	75	33	4.12364	0	725.455	906.818	10	1	0	4741.69	34.7077	1	0	5	6	0	4	23	12	0	4225	0	0
16363.6	3	6.633	608.72	0	1	0	189	9	19.7	0	663.636	718.939	19	0	0	16194.5	37.8462	0	0	0	5	0	10	14	6	2	7893	1578.6	0
14181.8	5	16.115	283.28	0	0	4	46	27	27.9382	0	568.636	616.023	14	0	0	18848	96.2308	0	0	4	8	0	14	14	10	2	3829	1148.7	0
10636.4	3	20.39	336.27	0	2	0	426	0	31.8764	6	609.091	659.848	7	0	0	3956	48.5769	0	0	0	3	0	10	14	11	3	620	186	0
3927.27	3	9.889	152.62	1	1	5	25	13	7.50545	0	741.818	927.273	13	0	0	3995.08	28.3385	0	0	6	4	0	12	7	4	3	210	42	1
3845.45	3	19.327	126.68	1	0	0	702	45	26.22	0	665	775.833	7	2	1	639.692	25.3846	0	0	0	3	0.00142201	13	8	5	1	1413	423.9	0
5000	3	13.185	172.48	1	2	5	25	13	38.5091	0	627.273	784.091	15	0	0	53389.6	85.9385	0	0	6	8	0	20	12	5	3	153	0	0
24000	5	9.76	507.1	0	0	0	35	14	23.6618	0	597.273	746.591	25	0	0	22331.1	26.8	0	0	0	10	0	28	31	11	5	8121	2436.3	0
23636.4	3	10.384	640.1	1	2	0	225	18	23.28	0	720	780	16	0	0	31791	55.2692	0	0	0	8	0	2	27	14	3	7879	1575.8	0
4118.18	3	10.74	123.13	1	0	1	25	13	20	1	747.273	934.091	10	0	0	706.462	5.5	1	0	25906	5.69049	0.00142201	8.4678	14.659	8.09808	1	1019	0	0
14090.9	5	15.939	364.61	0	0	0	425	44	17.01	0	622.727	778.409	11	0	0	5163.69	46.1538	0	0	0	3	0	13	15	3	0	5014	1504.2	0
23636.4	5	10.99	434.75	0	0	0	493	42	23.8827	0	765	956.25	9	0	0	5978.08	35.5385	1	0	0	2	0	8	10	5	0	6106	1831.8	0
12272.7	3	13.33	507.8	1	1	0	519	9	8.53364	0	560.455	700.568	10	0	0	10016	47.2	1	0	0	6	0	2	20	13	3	6788	678.8	0
22909.1	3	5.616	641.15	0	1	0	4	3	9.12	0	807.273	941.818	20	2	0	28102	21.3	0	0	0	10	0	6	40	15	3	6085	0	0
14181.8	3	18.25	435.34	2	1	0	691	22	8.51727	0	725.455	906.818	11	0	0	13671	65.4769	1	0	0	4	0	12	12	7	2	206	41.2	0
5175	3	11.421	212.18	1	1	4	176	3	24.53	5	544.091	680.114	8	0	0	2596.46	75.3	1	0	4	4	0	8	7	5	0	2086	625.8	0
2400	3	14.3	82.38	0	1	0	91	7	24.72	0	580.909	629.318	7	0	0	2992.62	39.1	1	0	38	2	0	20	33	11	3	96	19.2	0
14400	3	15.99	464.01	2	2	0	260	21	13.06	0	556.364	649.091	9	0	0	8891.54	55.5692	1	0	0	5	0	2	15	12	0	0	0	0
31818.2	3	20.933	1283.5	1	1	4	57	9	6.12	0	660	825	10	0	0	19397.5	82.4	0	0	4	6	0	10	7	7	0	0	0	0
13000	5	9.891	239.12	0	2	8	451	36	0.744545	0	872.727	1090.91	6	0	0	740.769	4.15385	0	0	9	1	0	4	6	6	5	2601	260.1	0
6525	3	9.891	261.06	0	0	0	718	19	32.38	2	790.909	922.727	20	0	0	7944	31.4462	0	0	0	4	0	25	15	13	3	936	93.6	1
4090.91	3	18.25	163.26	1	2	1	400	17	17.8255	0	690	747.5	8	0	0	5284.62	36.7385	1	0	1	7	0	4	7	4	1	1903	570.9	0
13090.9	3	7.282	368.45	1	0	9	19	14	16.4	0	646.364	700.227	17	0	0	9141.92	11	1	0	10	6	0	20	15	8	3	1488	446.4	0
24000	3	7.101	750.86	0	2	4	447	30	15.25	0	548.182	639.545	10	4	0	54675.7	56	0	0	4	8	0.00142201	3	22	15	3	4880	0	0
24545.5	3	7.986	929.89	0	1	0	533	15	14.0482	0	672.727	840.909	13	0	0	31406.5	69.2462	0	0	0	4	0	12	8	4	1	12454	3736.2	0
11818.2	5	17.039	312.63	0	2	4	107	30	18.08	0	710	828.333	6	0	0	10876	44.4	0	0	4	4	0	3	4	2	1	4882	0	0
12545.5	3	8.9	365.17	1	0	4	209	21	16.94	0	774.545	903.636	10	0	0	12183.7	54.8	1	0	21399	6	0	8	13	9	3	5463	1092.6	0
4090.91	3	9.891	163.67	0	1	0	386	19	18.9327	0	544.091	589.432	5	0	0	3701.54	102.846	1	0	0	2	0	8	13	6	0	747	149.4	0
23127.3	5	11.99	471.48	0	2	0	207	0	10.7273	0	650	758.333	9	0	0	14351	57.2923	1	0	106	3	0	11	13	6	1	8835	2650.5	0
33450	3	11.539	1087.05	2	2	4	238	22	23.7818	0	658.636	768.409	13	0	0	27345	31.1538	0	0	4	4	0	9	10	6	1	12784	2556.8	0
7554.55	3	10.582	222.22	1	2	0	130	33	12.6	0	627.273	731.818	17	0	0	6735.69	31.6615	1	0	193	5.69049	0.00142201	8.4678	14.659	8.09808	0	0	0	0
33090.9	5	11.862	639.67	0	0	0	195	38	25.47	0	725	785.417	10	0	0	30109	65.5385	0	0	0	5	0	4	10	8	2	3828	0	0
9090.91	5	14.418	243.29	0	1	4	53	19	9.64364	0	680	793.333	11	0	0	34873.8	69	0	0	4	6	0	2	11	5	2	4986	1495.8	0
15540.9	3	18.25	477.06	1	1	0	613	22	17.1164	0	600	750	31	0	0	12307.1	69.5692	1	0	0	9	0	26	18	7	3	6468	646.8	1
10977.3	3	11.178	403.49	1	1	0	19	14	4.52727	0	576.818	624.886	5	0	0	17567.3	49.6615	1	0	38	5.69049	0.00142201	8.4678	14.659	8.09808	2	4390	439	0
20454.5	5	23.1	676.34	2	2	0	196	14	14.3091	0	609.091	761.364	12	0	0	35929.6	80.0769	0	0	19651	7	0	4	18	12	0	2728	272.8	0
10000	3	6.24	305.31	0	1	4	143	8	7.61455	0	568.636	663.409	12	1	1	5248	10.1538	0	0	4	3	0	4	22	14	2	386	77.2	0
28363.6	3	14.08	821.2	1	1	0	143	8	13.3545	0	544.091	680.114	33	1	0	42035	28.1538	0	0	0	12	0	9	41	26	0	3079	307.9	0
22690.9	3	7.24	594.95	0	2	0	335	8	27.62	0	560.455	700.568	24	0	0	54957	54.2308	0	0	0	17	0.00142201	9	31	23	0	0	0	0
10000	3	7.101	312.86	1	0	4	466	36	6.38182	0	720	840	8	0	0	5365	46.7077	0	0	4	3	0	3	12	4	3	1270	381	0
818.182	3	8.767	31.33	1	0	0	31	2	28.69	0	585	731.25	5	0	0	8764.62	91.2692	0	0	0	2	0	3	4	3	2	64	12.8	0
9090.91	3	17.1	357.03	1	1	0	271	35	21.3709	0	660	770	4	2	1	7247	96.6	1	0	70	1	0	5	10	8	0	0	0	0
2750	3	10.384	96.82	2	0	2	614	3	15.6	0	552.273	644.318	9	1	1	1472.15	7.84615	0	0	5	4	0	10	14	7	1	336	33.6	0
12272.7	3	12.62	502.67	1	1	0	239	7	14.9482	0	695	810.833	7	0	0	1018.15	67.8462	0	0	0	1	0	17	2	1	2	723	144.6	0
8243.18	3	11.99	334.59	1	1	0	137	32	3.40364	0	556.364	602.727	3	1	1	1802.31	62.5	1	0	0	2	0	2	3	1	3	1427	285.4	0
30000	5	17.82	732.74	0	1	4	159	21	13.0364	0	720	780	8	0	0	12738	76.2462	0	0	356	5	0	4	7	5	1	6241	1872.3	0
14545.5	3	9.702	522.16	1	2	0	275	8	6.97	0	769.091	897.273	12	0	0	15905.8	27.6	0	0	0	8	0	5	14	6	3	5052	1515.6	0
2500	3	16.875	91.33	1	0	4	143	8	8.57455	0	680	736.667	9	0	0	3804	64.5	1	0	29030	7	0	0	20	11	3	300	90	0
4090.91	3	7.101	156.43	2	0	0	818	43	22.9	0	735	857.5	19	0	0	3713	42.2769	0	0	0	2	0	30	5	4	3	745	223.5	1
10909.1	5	28.72	378.86	1	2	0	337	14	27.1364	0	604.545	705.303	10	0	0	3606	37.0154	0	0	0	5	0	36	12	2	0	0	0	1
8500	3	11.691	286.36	1	1	0	235	8	30.78	0	660	715	18	1	1	15371.5	60.9231	1	0	0	15	0	4	25	11	1	1147	114.7	1
32727.3	5	16.555	952.65	1	2	0	222	12	21.2155	1	663.636	774.242	9	0	0	2661.92	48.6769	0	0	0	1	0	9	10	8	0	0	0	0
10000	3	19.866	361.83	1	0	9	275	8	29.5727	0	572.727	668.182	12	0	0	21576.9	74.8846	0	0	10	7	0	4	19	8	0	0	0	0
11556.8	3	12.312	480.57	0	1	0	52	19	22.8273	0	576.818	672.955	14	0	0	21092.6	80.9	1	0	12552	10	0	7	18	9	1	3358	335.8	0
7727.27	3	12.79	285.54	1	2	5	407	10	13.09	0	552.273	598.295	4	0	0	1653.08	26.9	0	0	6	2	0	8	3	2	0	3505	701	0
6818.18	3	7.803	237.35	1	1	0	214	41	25.3091	0	568.636	663.409	12	0	0	10335.2	32.9538	1	0	0	7	0	8	21	4	0	0	0	0
8181.82	3	12.39	334.01	0	0	0	212	7	28.42	0	604.545	654.924	7	1	0	2364	85.4	1	0	0	3	0	5	4	2	0	3924	784.8	0
22727.3	3	11.151	835.03	0	1	0	121	14	7.08	0	636.364	689.394	6	0	0	7261.15	29.7692	1	0	0	3	0	11	14	8	1	3302	990.6	0
12000	3	5.32	331.27	0	0	0	2	2	17.73	0	704.545	880.682	10	0	0	14009.5	22.2923	0	0	0	4	0	10	11	4	3	3383	0	0
13636.4	3	12.49	501.74	0	0	0	104	23	14.9482	1	564.545	705.682	14	0	0	6609.23	58.1538	1	0	0	7	0.00142201	13	25	18	0	5123	1024.6	0
1772.73	3	7.986	46.5	0	0	4	78	19	12.2818	0	685	742.083	9	1	1	5916.62	85.6154	0	0	4	4	0	6	5	4	1	96	28.8	0
28636.4	5	23.22	1043.78	2	2	0	157	8	12.3382	0	725.455	846.364	6	0	0	37503.7	94.5	1	0	0	3	0	6	20	7	2	14214	4264.2	0
29545.5	3	8.998	785.49	0	2	4	384	8	26.8936	0	685	799.167	21	0	0	91422.5	87.6923	0	0	4	19	0.00142201	8	32	17	3	12109	2421.8	0
4909.09	3	10.087	191.28	2	1	0	245	26	3.27273	1	604.545	705.303	8	3	0	3099.23	25.0385	1	0	0	3	0	3	10	5	1	1635	0	0
29545.5	5	23.67	752.96	0	2	0	38	21	21.7555	0	665	831.25	20	0	0	23405.8	57.4615	0	0	0	10	0	12	17	9	0	0	0	0
6400	3	11.565	215.18	1	2	4	465	19	27.6	0	758.182	821.364	7	0	0	6492	61.8462	1	0	4	6	0	2	8	6	3	655	196.5	0
18000	5	19.782	496.94	0	2	0	196	14	10.1236	0	720	780	8	1	1	14628	89.5	1	0	42384	5	0	1	10	6	0	3141	628.2	0
18909.1	3	11.47	527.39	1	2	0	619	11	25.0036	0	725.455	846.364	10	3	1	9618	59.6308	1	0	0	3	0	4	15	5	1	4635	463.5	0
21213.6	3	13.959	602.13	0	2	4	9	7	35.57	0	665	831.25	17	0	0	30274	62.7846	0	0	4	9	0	8	21	12	3	1783	356.6	1
11400	3	12.62	382.03	1	0	4	141	13	19.08	0	650	812.5	9	0	0	14233.8	55.5692	0	0	4	6	0	1	15	5	3	1985	198.5	0
20454.5	3	8.991	806.57	1	1	0	51	13	11.8273	0	680	793.333	8	0	0	16530	74.0308	1	0	0	5	0	2	9	7	3	6063	606.3	0
6545.45	3	24.85	317.45	0	0	4	373	13	22.4618	0	685	856.25	11	2	1	6968	18.5231	0	0	4	5	0	9	34	25	0	3025	605	0
5454.55	3	14.289	168.45	0	2	7	70	32	22.1782	0	640.909	694.318	14	0	0	7599	39	0	0	8	11	0.00142201	2	13	7	3	918	91.8	0
14000	5	10.791	311.36	0	1	4	491	30	6.02182	0	580.909	677.727	10	0	0	17845.7	53.4231	0	0	4	3	0	2	23	10	1	4820	482	0
2727.27	3	19.646	90.21	2	2	5	500	27	12.13	0	736.364	859.091	6	1	1	0	0	0	0	6	0	0	8	12	5	0	0	0	0
12000	3	10.91	392.36	1	0	4	549	8	9.01	0	597.273	696.818	10	0	0	9075.69	37.1	0	0	4	3	0	5	5	4	0	0	0	0
21681.8	3	8.767	830.05	0	1	0	501	26	31.1127	0	622.727	726.515	17	0	0	15298	49.0154	0	0	0	5	0	18	17	10	0	0	0	0
7363.64	3	10.503	297.52	1	0	3	51	13	4.96636	0	790.909	988.636	5	0	0	6493.85	47.7692	1	0	3	5	0	1	5	5	0	0	0	0
2454.55	3	14.52	103.3	0	2	0	164	20	27.49	0	695	868.75	14	0	0	11370.2	50.7692	1	0	0	7	0	4	19	6	0	0	0	1
17454.5	3	12.141	542.89	1	1	3	399	37	10.38	0	735	796.25	10	0	0	22.1538	0.1	0	0	3	1	0	11	12	9	0	0	0	0
4909.09	3	9.064	188.69	1	0	5	715	13	15.5864	0	769.091	833.182	10	0	0	13850.8	45	1	0	6	7	0.00142201	4	10	6	0	0	0	0
10636.4	3	8.253	286.92	1	1	4	209	21	34.3964	2	627.273	731.818	15	0	0	2412	97.2692	1	0	4	3	0	22	3	3	0	0	0	0
35000	3	25.652	1360.69	0	2	5	240	21	18.6055	0	552.273	644.318	8	2	1	7120.62	22.4308	0	0	6	3	0	4	9	4	0	0	0	0
5000	3	12.29	166.77	1	1	5	467	5	19.4727	0	564.545	658.636	12	2	0	11027.7	49.4308	0	0	6	10	0	5	13	6	0	0	0	0
11818.2	3	9.675	326.21	1	1	0	53	19	21.5673	0	636.364	689.394	7	0	0	10327.4	48.2769	0	0	0	4	0	6	9	4	0	0	0	0
10309.1	5	28.14	393.38	0	2	0	420	4	33.7745	0	690	747.5	16	0	0	6933.23	36.2	1	0	0	10	0	7	13	5	0	0	0	0
9818.18	5	14.418	291.95	0	0	4	4	3	20.6	0	631.818	789.773	12	0	0	11768.6	58.8	0	0	4	8	0	13	14	7	0	0	0	0
14727.3	5	12.222	414.92	0	1	0	703	8	7.72364	0	613.636	767.045	5	0	0	3536.62	33.8077	0	0	0	1	0	4	7	6	0	0	0	0
8181.82	3	17.622	351.67	0	2	4	223	12	14.8827	0	568.636	710.795	13	0	0	35507	52.0615	0	0	4	9	0	8	18	10	0	0	0	0
9818.18	5	7.173	243.15	1	1	1	131	6	18.2618	0	695.455	753.409	14	0	0	1110.46	3.23077	0	0	1	3	0	38	16	11	0	0	0	0
35000	5	20.75	941.96	2	2	4	292	17	16.0909	0	552.273	644.318	13	0	0	42484.6	90.1846	0	0	4	13	0	7	17	6	0	0	0	0
4545.45	3	9.17	159.4	0	2	4	122	9	16.16	0	720	840	8	1	1	5601.92	35.8154	1	0	4	3	0	13	15	8	0	0	0	0
21272.7	5	14.498	411.22	1	1	4	62	13	4.73	0	650	704.167	5	0	0	9961.85	43.7	0	0	4	3	0	3	12	9	0	0	0	0
12000	5	8.253	250.1	0	2	4	451	36	11.9536	0	600	650	12	0	0	13687	30.7385	0	0	4	8	0	28	24	15	0	0	0	0
9454.55	3	7.34	248.27	2	0	0	116	14	32.53	0	695.455	869.318	10	0	0	19754	43.7308	1	0	0	4	0	10	17	9	0	0	0	0
28000	3	9.79	889.09	1	1	4	171	8	12.11	0	730	912.5	8	0	0	14293.8	59.8	0	0	4	3	0	4	9	4	0	0	0	0
7272.73	3	6.534	247.97	0	0	0	410	8	19.4	0	621.818	777.273	10	0	0	9492	39.0923	0	0	0	5	0	8	12	6	0	0	0	0
11818.2	3	11.99	332.1	1	1	0	99	8	4.13455	0	576.818	624.886	5	6	3	5865.23	24.8308	0	0	0	4	0	2	6	4	0	0	0	0
7363.64	3	12.69	301.91	0	1	4	165	17	3.88182	1	560.455	653.864	5	2	0	5701.15	83.1385	1	0	4	3	0	2	6	3	0	0	0	0
7500	3	5.32	225.87	0	0	9	480	8	12.4609	0	654.545	763.636	14	0	0	10319	14.1	1	0	10	4	0	12	11	6	0	0	0	0
10909.1	3	7.173	375.88	0	1	4	12	9	18.26	0	758.182	947.727	11	0	0	10409.5	64.6154	0	0	4	6	0	21	7	5	0	0	0	0
1500	3	11.349	50.26	1	0	7	124	13	16.9691	0	670	725.833	7	0	0	19362	78.2769	1	0	2348	5.69049	0.00142201	8.4678	14.659	8.09808	0	0	0	0
11818.2	3	8.253	318.79	1	1	0	38	21	2.74545	0	552.273	598.295	13	6	1	9448.85	39.6	1	0	0	5	0	0	18	10	0	0	0	0
22727.3	5	11.061	559.79	0	2	0	134	8	1.88	1	544.091	680.114	6	0	0	8583.69	68.1231	0	0	0	4	0	5	8	5	0	0	0	0
4254.55	3	17.76	129.72	0	1	4	624	27	9.72818	0	556.364	695.455	18	0	0	19039.4	56.4	0	0	1231	12	0	4	22	9	0	0	0	0
2659.09	3	17.57	105.12	1	0	5	275	8	10.3418	1	690	862.5	11	0	0	248.077	1.3	1	0	6	1	0	6	20	5	0	0	0	0
12763.6	5	13.67	249.46	1	1	0	447	30	6.60273	0	740	925	9	0	0	4392.77	23.6923	1	0	25511	3	0	2	11	6	0	0	0	0
5909.09	3	16.605	181.9	1	1	4	27	12	13.8	1	631.818	789.773	21	0	0	2886.46	29.3077	0	0	4	4	0	15	9	5	3	310	0	1
8181.82	3	8.82	321.74	1	1	4	54	28	17.57	0	741.818	927.273	9	0	0	21215.4	58.7308	0	0	4	6	0	3	12	10	1	1812	181.2	0
9000	3	5.32	271.04	2	1	3	258	8	7.22	0	755	880.833	11	0	0	31264	57.1154	1	0	3	6	0	4	15	13	1	3935	393.5	0
5000	3	23.1	188.38	0	2	5	625	13	30.5182	0	736.364	920.455	11	0	0	17283	58.8923	1	0	2561	4	0	13	6	4	0	742	0	0
13090.9	3	12.294	408.16	0	2	5	323	12	23.4	1	675	787.5	14	0	0	16659.7	53.8462	1	0	6	7	0	4	13	9	2	3544	0	0
14181.8	3	18	445.97	2	0	0	742	2	24.12	0	665	720.417	7	0	0	17147	81.4615	1	0	0	5	0	4	7	4	1	2534	506.8	0
16000	3	13.959	536.72	0	0	0	4	3	4.31	1	618.182	772.727	8	2	0	7311.23	45.4462	1	0	0	3	0	4	13	6	2	990	99	0
15000	3	17.27	536.81	0	0	0	152	14	18.5545	0	736.364	859.091	16	0	0	22028	80.0308	1	0	38	5.69049	0.00142201	8.4678	14.659	8.09808	2	2330	233	0
8272.73	3	7.986	216.98	0	1	5	80	21	11.0909	0	627.273	784.091	34	0	0	9590.77	8.8	0	0	6	14	0	4	43	27	3	1400	420	1
18000	3	10.323	593.32	0	1	0	471	42	8.52545	0	700	816.667	10	0	0	10854.5	58.7077	1	0	0	6	0	5	8	5	2	1943	582.9	0
13479.5	3	11.99	547.13	1	0	4	253	21	26.52	0	725.455	906.818	14	0	0	20513.1	62.5385	0	0	4	8	0	2	15	10	2	3816	763.2	0
12000	5	13.99	279.16	0	0	4	328	3	24.2636	0	613.636	664.773	16	1	1	8524.62	53.0923	0	0	4	8	0	4	14	3	0	0	0	1
32727.3	5	14.049	723.34	0	2	4	188	23	25.0855	0	654.545	709.091	11	0	0	19956	53.5385	1	0	4	4	0	12	13	6	3	12980	1298	0
17454.5	5	23.4	454.74	2	2	2	531	14	11.4873	1	720	840	9	0	0	4542.46	59.7692	0	0	5	5	0	7	24	21	5	5611	1122.2	0
3170.45	3	14.049	135.49	1	1	0	634	32	7.2	0	544.091	634.773	6	2	1	2729.54	60.3	1	0	5	4	0	1	9	2	3	1338	0	0
12000	3	6.759	373.33	0	1	0	89	3	19.3636	0	829.091	967.273	21	0	0	15011.1	24	1	0	38	5.69049	0.00142201	8.4678	14.659	8.09808	2	4792	958.4	0
28570.5	3	7.9	756.45	0	2	0	74	30	12.0436	2	720	840	9	0	0	9116.54	17.0769	1	0	38	4	0	7	16	13	0	0	0	0
8727.27	3	11.67	264.46	0	1	9	17	13	12.7964	1	548.182	639.545	7	2	0	13933	88.7385	1	0	10	1	0	4	13	12	0	61	6.1	0
4000	3	17.919	141.21	0	1	2	590	8	6.74	0	600	650	10	2	1	688.615	6.09231	1	0	5	5	0	6	9	6	0	93	18.6	0
10909.1	3	13.332	399.26	2	2	4	51	13	29.0836	0	631.818	737.121	32	0	0	32453	50.2923	1	0	4	22	0	6	47	21	1	810	243	1
8836.36	3	12.582	369.02	0	0	5	353	30	23.0236	0	675	731.25	15	0	0	31598.8	83.7846	1	0	6	6	0	20	7	5	0	0	0	0
10000	3	15.433	341.93	1	2	0	100	4	19.97	0	604.545	755.682	13	1	1	5122.92	12.9231	0	0	0	7	0	11	18	7	1	2124	0	0
12272.7	5	20.5	401.6	2	0	0	116	14	12.3491	0	796.364	862.727	9	0	0	2147.08	12.6462	0	0	0	1	0	5	12	3	2	6288	628.8	0
15363.6	3	12.897	446.4	0	0	0	665	40	16.19	0	690	805	7	0	0	11492.9	69.2462	1	0	55682	5.69049	0.00142201	8.4678	14.659	8.09808	0	0	0	0
11818.2	3	13.178	332.05	1	0	0	385	8	10.5091	2	685	856.25	11	0	0	3939.69	24.5538	1	0	0	1	0	8	17	9	1	2820	0	0
9109.09	3	15.037	284.05	1	1	5	167	8	9.06545	0	572.727	715.909	14	1	1	5820	28.8	0	0	6	8	0	4	14	4	2	2582	516.4	0
19090.9	3	7.69	655.07	0	2	0	64	14	8.86909	0	720	780	13	0	0	4715.77	36.2769	1	0	0	1	0	14	8	4	1	4190	838	0
4090.91	3	22.55	187.1	1	1	0	228	24	23.7491	0	604.545	705.303	7	0	0	5325.38	106.508	1	0	38	5.69049	0.00142201	8.4678	14.659	8.09808	0	0	0	0
41363.6	5	15.939	823.31	0	2	4	291	23	30.0182	1	580.909	677.727	21	0	0	19994.8	27.1385	1	0	4	8	0	9	27	11	0	0	0	0
9000	3	5.852	331.27	0	0	4	406	8	5.78182	0	825	1031.25	12	0	0	3238.15	2.5	0	0	4	5	0	1	19	14	0	1144	228.8	0
4636.36	3	33.715	218.33	0	2	4	411	11	10.5545	0	725.455	785.909	9	0	0	11328.9	81.8077	1	0	4	6	0	5	9	5	3	161	16.1	0
35100	3	26.95	1173.03	0	1	4	41	25	35.04	0	627.273	784.091	20	0	0	41821.8	75	1	0	4	15	0	7	24	10	2	9641	2892.3	0
7272.73	3	14.391	281.22	1	1	0	221	8	11.1927	0	695	752.917	9	0	0	6275	41.3538	0	0	0	4	0	3	6	5	3	512	102.4	0
5727.27	3	9.441	170.62	1	2	4	681	10	14.29	0	720	780	12	1	1	4235	66.1231	1	0	4	3	0	10	29	16	2	2064	412.8	1
8631.82	5	14.839	242.7	1	0	6	51	13	10.0091	0	796.364	929.091	16	0	0	2359.54	13.2692	0	0	7	5	0	14	9	6	0	0	0	0
14545.5	3	7.89	500.58	0	2	0	208	28	5.15455	0	560.455	653.864	9	5	0	180305	3.9	0	0	0	4	0	4	14	11	1	3756	375.6	0
5522.73	3	15.61	212.42	2	1	2	313	43	35.47	0	622.727	778.409	10	0	0	5203.38	101.123	1	0	5	3	0	16	4	2	0	421	84.2	1
25000	5	11.997	573.06	1	0	4	17	13	12.57	0	568.636	616.023	7	0	0	23427	54.8154	0	0	4	5	0	4	13	11	2	11784	1178.4	0
15000	3	9.819	490.45	1	1	3	171	8	12.6109	0	720	780	6	0	0	12306.9	87.9231	0	0	3	4	0	3	8	5	3	3450	345	0
10909.1	3	10.087	318.79	1	1	0	15	12	16.52	0	670	725.833	9	1	0	12196.2	75.9231	0	0	0	5	0	5	10	4	3	2435	0	0
3927.27	3	14.661	127.09	1	2	0	66	14	26.0018	0	725.455	846.364	19	1	0	22171.7	95.0769	1	0	0	16	0	3	24	17	0	0	0	1
1472.73	3	9.891	58.93	1	2	4	157	8	1.20909	0	548.182	593.864	8	2	1	1131.85	7.10769	0	0	4	2	0	1	18	9	2	403	120.9	0
12000	3	5.32	361.38	0	0	4	238	22	11.8364	4	730	790.833	13	0	0	15972	35.6308	0	0	4	6	0	12	11	10	2	1083	108.3	0
17500	3	7.371	549.93	0	0	0	342	21	27.1455	1	695	810.833	18	0	0	14689	33.2	1	0	0	11	0	12	26	16	1	6467	1940.1	0
5727.27	3	24.365	267.88	1	1	0	221	8	18.54	0	670	781.667	13	0	0	4415	106.154	1	0	0	3	0	10	4	2	0	0	0	1
20454.5	3	12.62	837.79	0	2	0	511	13	56.0618	1	627.273	731.818	12	0	0	44289	82.5	1	1	0	9	0	4	15	11	0	0	0	1
7090.91	3	15.378	205.01	0	2	0	161	14	16.8545	2	613.636	767.045	14	0	0	3950.77	83.9	0	0	0	7	0	39	17	8	0	0	0	0
31818.2	3	30.94	1503.89	1	0	0	12	9	77.6618	0	736.364	797.727	8	1	1	5296.15	33.8	0	1	0	5	0	9	9	4	0	0	0	1
24818.2	5	19.327	528.37	1	1	5	221	8	9.54	0	752.727	878.182	7	1	1	5534.77	74.2	0	0	6	4	0	5	5	2	0	0	0	0
9818.18	3	10.087	382.55	0	1	4	248	11	20.3273	1	600	700	17	1	1	26709.2	78.6154	1	0	4	9	0	18	14	4	0	0	0	0
7090.91	3	8.69	187.75	1	1	4	325	30	10.6364	0	705	822.5	13	0	0	6512.31	62.6769	1	0	44716	5.69049	0.00142201	8.4678	14.659	8.09808	0	0	0	1
28636.4	3	7.551	1103.09	2	2	4	55	29	19.6909	0	735	796.25	14	0	0	36320.8	95.1	0	0	4	4	0	12	6	5	0	0	0	0
13886.4	3	17.86	423.97	1	0	4	162	2	6.83636	0	540	675	4	0	0	5048.31	67.5	1	0	4	3	0	3	3	3	0	0	0	0
15363.6	5	16.695	334.02	0	1	0	715	13	7.51636	0	585	731.25	11	0	0	2556	6.83077	1	0	0	6	0	10	16	7	0	0	0	0
23681.8	5	22.99	734.22	0	2	0	35	14	36.2091	0	685	856.25	15	0	0	50092.6	78.6154	1	0	0	13	0.00142201	5	22	8	0	0	0	0
9163.64	3	12.672	383.23	1	1	4	408	14	22.5055	0	725.455	846.364	17	0	0	16720	49.3	1	0	4	10	0	7	13	5	0	0	0	0
12000	3	18.99	439.82	0	1	5	512	21	13.8	0	741.818	927.273	7	0	0	25921.5	69.4	1	0	6	6	0	4	8	2	0	0	0	0
5236.36	3	7.69	199.64	0	0	0	369	21	9.64364	1	650	704.167	11	0	0	14783	66.5769	1	0	0	5	0	7	16	13	0	0	0	0
6545.45	3	12.59	241.18	0	2	2	197	4	23.28	1	580.909	726.136	10	0	0	11956	46.9615	0	0	5	5	0	9	7	6	0	0	0	0
36363.6	3	10.538	1282.82	1	2	5	108	21	2.45455	0	700	758.333	4	0	0	2704.62	25.0385	1	0	6	2	0	1	7	5	0	0	0	0
30786.4	5	23.301	778.26	1	1	6	167	8	8.4	1	670	725.833	4	0	0	4233.38	56.6538	0	0	7	2	0	8	17	7	0	0	0	0
1090.91	3	16.416	36.28	1	0	9	197	4	25.3964	0	725.455	785.909	8	0	0	19712	82.8	1	0	10	8	0	4	10	7	0	0	0	0
33090.9	3	17.171	979.02	0	2	0	149	22	17.1164	0	747.273	809.545	25	0	0	18223.4	40	1	0	0	17	0	7	28	12	0	0	0	0
14727.3	5	16.115	318.69	1	1	4	324	10	18.3636	0	540	675	14	4	2	16009.5	47.2	0	0	4	6	0	1	16	10	0	0	0	1
15000	5	19.866	381.4	0	1	0	413	37	16.4364	0	700	875	14	1	1	15243.8	49.7	0	1	0	8	0	9	14	4	0	0	0	0
21579.5	3	17.973	979.79	0	2	5	219	21	32.0182	1	618.182	772.727	5	0	0	12699.7	108.462	1	0	548	2	0.00142201	6	5	3	0	0	0	0
30545.5	3	15.389	956.84	0	2	0	602	48	15.49	0	604.545	654.924	9	1	1	3222.69	21.3231	0	0	0	1	0	11	17	3	0	0	0	0
12272.7	5	13.959	338.93	1	1	4	146	23	11.6091	0	564.545	705.682	15	1	1	10617.7	43.5	0	0	4	3	0	8	21	7	0	0	0	1
5863.64	3	15.291	191.61	1	1	0	9	7	26.5964	0	600	750	11	1	0	4577.31	42.5538	0	0	0	6	0	2	10	5	0	0	0	1
5000	3	12.529	164.62	1	0	0	66	14	16.9745	0	774.545	839.091	12	0	0	9386.54	30.3692	1	0	0	6	0	4	17	6	0	0	0	0
23636.4	3	8.253	637.58	0	1	4	121	14	8.66455	1	600	650	26	1	0	26149	36.5077	1	0	4	8	0	8	38	23	0	0	0	0
17454.5	3	9.17	510.07	1	0	4	177	26	18.8836	0	636.364	795.455	7	0	0	25008	68.0615	1	0	4	3	0	5	8	7	0	0	0	0
32000	3	11.539	1039.93	2	2	0	99	8	12.2727	0	670	781.667	8	0	0	20770.2	43.0769	0	0	0	7	0.00142201	5	16	9	0	0	0	0
9204.55	3	18.689	401.04	1	1	0	141	13	6.66	0	560.455	653.864	11	0	0	16766.6	67.7	1	0	0	8	0	0	12	10	0	0	0	1
14181.8	3	14.421	404.97	1	1	4	369	21	11.2364	0	556.364	602.727	10	0	0	8225	62.4231	1	0	87	5.69049	0.00142201	8.4678	14.659	8.09808	0	0	0	0
8022.73	3	14.418	310.35	1	1	0	227	35	14.0645	0	668.182	779.545	8	0	0	10667.3	43.6	0	0	0	1	0	4	5	3	0	0	0	0
11818.2	3	8.679	312.86	0	1	2	488	24	18.2364	0	747.273	809.545	7	0	0	28022.3	77.8154	0	0	5	6	0	5	8	7	0	0	0	0
19636.4	3	10.251	790.17	1	1	0	335	8	5.78182	0	604.545	654.924	9	0	0	32508	103.615	0	0	0	6	0	9	10	8	0	0	0	0
21818.2	3	12.465	682.08	0	0	4	57	9	13.61	0	705	763.75	8	0	0	20364	106.038	1	0	16541	5.69049	0.00142201	8.4678	14.659	8.09808	3	2508	0	0
7500	3	18.458	266.58	1	0	4	19	14	6.58	0	670	781.667	5	0	0	5471.54	79.2692	0	0	32346	3	0	6	6	4	0	0	0	0
10000	3	12.617	329.62	1	1	0	146	23	22.48	1	665	775.833	13	0	0	14465.8	57.3462	0	0	0	8	0	12	12	5	3	1507	150.7	0
13090.9	5	16.489	285.42	1	1	0	51	13	17.2473	5	736.364	859.091	20	0	0	8339.08	14.1923	0	0	0	10	0	8	21	12	0	0	0	1
14181.8	3	10.252	383.37	0	0	4	129	30	2.55273	0	650.455	758.864	16	0	0	4260	7	1	0	0	5.69049	0.00142201	8.4678	14.659	8.09808	0	0	0	1
6545.45	3	8.775	231.48	0	1	2	5	4	11.0909	3	741.818	927.273	11	0	0	13928.3	78.1154	1	0	5	8	0	4	15	9	3	1497	299.4	0
7090.91	3	11.99	199.26	1	2	0	106	12	3.00909	0	725.455	846.364	4	0	0	3624.92	86.2615	0	0	0	4	0	0	4	2	0	0	0	0
2372.73	3	26.268	113.6	0	1	0	106	12	19.43	0	769.091	961.364	6	0	0	9444	79.9385	1	0	0	4	0	5	11	7	3	1099	0	0
6109.09	3	11.44	184.51	2	0	0	576	23	28.6255	0	548.182	639.545	11	0	0	6129	57.9385	1	0	0	4	0	15	9	6	3	505	101	1
16000	3	11.358	536.18	1	0	0	512	21	30.4691	1	609.091	761.364	13	0	0	12942.5	90.5769	0	0	0	8	0	7	14	6	0	0	0	0
4581.82	3	10.026	183.71	0	2	0	219	21	20.8818	0	700	758.333	11	0	0	2848.85	15.6	1	0	55090	5.69049	0.00142201	8.4678	14.659	8.09808	0	0	0	1
25963.6	5	16.074	602.56	0	1	0	20	15	24.38	0	725.455	846.364	11	0	0	8709.23	73.0385	0	0	0	7	0	9	7	4	0	0	0	0
19636.4	5	13.18	548.29	0	2	0	362	35	16.15	0	540	630	7	1	0	7729.85	106.077	0	0	0	3	0	20	6	4	2	2653	795.9	0
15081.8	3	13.779	481.35	1	2	0	353	30	18	0	548.182	639.545	7	1	0	7729	55.2	0	0	0	3	0	4	5	3	2	914	274.2	0
20000	3	17.991	743.17	1	2	0	134	8	28.42	0	705	763.75	10	0	0	3036.92	15.4154	1	0	0	4	0	9	13	5	0	0	0	0
8000	3	10.989	258.1	2	1	0	74	30	14.5	0	654.545	818.182	13	0	0	11869.6	22.8	0	0	0	5	0	8	25	14	3	2079	207.9	0
28636.4	5	19.782	966.27	0	1	4	549	8	17.2636	0	752.727	815.455	13	0	0	20686.6	78.7	1	0	1395	7	0	25	26	11	5	13800	0	0
33090.9	3	19.03	1026.8	1	0	0	134	8	7.02	0	556.364	695.455	18	0	0	23410.4	44.0308	0	1	0	14	0	0	18	13	0	0	0	0
26181.8	3	8.253	765.1	0	1	4	156	18	18.1182	0	790.909	856.818	17	0	0	34295.7	76.5231	0	0	4	10	0	7	17	10	3	9277	0	0
14152.3	3	11.691	403.43	2	1	0	810	24	25.2909	0	677.273	733.712	11	0	0	9034	25.9	1	0	0	6	0	5	11	5	0	5913	0	1
7000	3	10.341	230.8	1	1	0	216	8	12.8782	8	609.091	761.364	11	0	0	6492	51.6923	0	0	0	5	0	5	13	9	0	0	0	0
14545.5	3	15.291	570.37	1	1	0	27	12	15.4818	0	604.545	755.682	18	0	0	28555.7	63.3	1	0	0	12	0	9	27	15	0	5374	1074.8	0
13090.9	5	15.389	334.99	2	0	0	108	21	10.0882	0	609.091	761.364	16	1	1	12597.7	21.6923	0	0	0	8	0	5	26	10	0	0	0	0
13090.9	5	14.949	276.68	0	0	0	140	8	14.22	0	638.182	691.364	15	0	0	1211.54	1.61538	0	0	0	1	0	3	31	20	3	3574	714.8	1
6363.64	3	10.99	229.14	1	1	0	157	8	21.2727	0	780	975	8	0	0	5551.15	97.3846	0	0	0	4	0	3	7	5	0	0	0	0
21818.2	5	11.466	542.89	0	0	0	115	8	13.7018	0	645.455	699.242	10	1	1	21758.2	77.1923	0	0	0	5	0	3	11	7	0	0	0	0
7272.73	3	10.087	255.04	0	0	0	324	10	32.7	0	718.182	897.727	16	0	0	3851.54	11.8846	1	0	0	2	0	11	21	8	0	0	0	1
14181.8	3	9.441	389.98	0	1	0	540	13	24.4882	0	560.455	653.864	12	0	0	10925.8	62.7692	1	0	0	5	0	9	17	10	2	5101	510.1	0
9600	3	13.59	326.2	0	0	4	271	35	8.32091	0	747.273	871.818	6	1	0	16688	67.8	0	0	4	4	0	1	8	7	1	1401	420.3	0
24545.5	3	13.67	1020.53	2	2	0	324	10	29.9891	0	758.182	821.364	16	1	1	15337	47.6	0	0	0	9	0	7	15	4	3	385	115.5	0
8836.36	3	9.675	352.31	1	2	0	14	11	18.2364	1	618.182	669.697	12	0	0	10134.9	45.9692	0	0	0	6	0	20	17	1	0	978	97.8	0
13636.4	5	10.845	334.05	0	2	5	717	42	25.57	0	548.182	685.227	9	0	0	7262.77	29.5385	0	0	6	7	0.00142201	9	14	9	0	0	0	0
9090.91	3	6.97	308.64	1	1	0	253	21	15.6655	0	631.818	789.773	7	0	0	3905	42.4308	0	0	0	3	0	3	10	5	3	3867	386.7	0
2400	3	11.511	73.91	1	2	5	136	8	24.57	0	685	742.083	11	0	0	19371.9	52	1	0	6	7	0	1	17	11	2	462	138.6	0
20454.5	3	6.68	768.28	1	2	0	549	8	11.0291	0	823.636	960.909	8	0	0	46702	21.9231	0	0	0	5	0	6	9	4	3	8156	815.6	0
2454.55	3	22.88	101.45	1	2	1	99	8	22.6455	0	544.091	680.114	7	0	0	3810.15	56.6538	1	0	1	5	0	5	6	2	0	0	0	0
12272.7	3	12.303	510.27	1	2	0	97	12	20.4818	0	670	781.667	10	3	3	13022.8	62.9538	0	0	0	5	0	9	8	3	0	0	0	0
8000	3	13.882	268.09	1	0	0	107	30	2.18182	1	660	825	6	0	0	4165	25.4769	1	0	0	3	0	8	32	20	3	603	0	0
4136.36	3	8.01	111.14	1	0	0	317	36	14.3782	0	725	845.833	10	0	0	7828.15	34.1	1	0	38	2	0	10	22	15	3	1019	305.7	0
11818.2	3	17.589	351.53	1	0	5	389	8	5.96727	0	796.364	929.091	8	0	0	3349.62	13.6	0	0	6	6	0	0	15	6	2	4326	865.2	0
5454.55	3	10.989	161.32	1	2	7	455	13	17.2364	0	705	763.75	10	0	0	11981	37.2	0	0	8	4	0	6	13	6	3	421	42.1	0
16322.7	3	20.064	723.65	0	0	4	290	18	24.7273	0	622.727	726.515	11	0	0	26566	69.9	0	0	4	7	0	21	10	6	1	795	0	0
5477.27	3	9.441	195.8	1	0	0	184	26	19.6091	2	631.818	737.121	18	1	1	1353	13.9	0	0	0	7	0	10	18	7	1	130	13	0
24000	3	12.001	784.71	1	0	0	339	26	14.0727	0	659.091	768.939	12	0	0	20366.8	64.1	0	0	0	7	0	4	22	14	0	0	0	0
17500	5	7.39	349.76	0	0	0	370	13	13.1727	0	580.909	726.136	11	0	0	21814.6	65	0	0	0	6	0	10	9	8	3	7638	2291.4	0
14181.8	3	5.32	361.38	1	0	0	31	2	10.44	0	780	975	20	0	0	10342	48.0308	0	0	0	3	0	21	5	5	0	4208	1262.4	0
2363.64	3	14.895	70.86	1	2	5	63	14	34.6182	0	730.909	913.636	17	0	0	6150	52.8	0	0	6	8	0	18	13	4	1	248	74.4	1
3600	3	16.115	124.18	1	1	0	395	44	20.2909	0	705	822.5	6	0	0	2537	43.0385	1	0	0	3	0	2	5	2	0	0	0	0
13636.4	5	14.278	341.15	0	0	0	89	3	10.8573	0	752.727	940.909	7	0	0	14703.2	55.5	0	0	0	4	0	5	5	2	0	5101	510.1	0
11700	3	13.779	497.89	1	0	0	166	8	19.2	0	690	747.5	16	0	0	8504.46	49.7	1	0	589	4	0	12	17	5	2	6788	678.8	1
24000	3	8.01	698.58	0	1	4	568	0	8.48182	0	568.636	710.795	21	0	0	21498.6	35.5	1	0	4	11	0	7	48	29	3	6428	1285.6	0
14890.9	3	10.791	418.45	1	0	9	111	8	10.9	0	758.182	884.545	7	1	1	13379.7	74	0	0	10	4	0	9	9	4	0	0	0	0
22484.1	3	7.99	596.09	2	1	0	152	14	14.61	0	646.364	807.955	13	0	0	25549.6	19.8154	0	0	0	4	0	4	13	11	3	7137	0	0
2272.73	3	7.362	78.55	2	0	0	483	3	31.9991	0	774.545	968.182	11	0	0	21004.6	70.8615	0	0	0	8	0	7	14	11	3	88	8.8	0
11818.2	3	11.539	324.98	1	2	4	152	14	3.15818	0	600	700	14	1	0	7325.54	35.7231	1	0	4	9	0	5	17	7	2	431	86.2	0
10181.8	5	10.782	249.03	0	0	2	61	31	23.8636	0	585	633.75	13	0	0	42576.2	79.6923	0	0	5	6	0	8	24	13	1	2234	0	0
5454.55	3	7.101	187.72	2	0	5	4	3	13.0818	0	765	892.5	14	0	0	6838.85	17.1923	1	0	6	6	0	4	14	10	0	1048	209.6	0
16072.7	5	15.291	337.93	0	1	0	577	3	13.5655	0	670	781.667	10	0	0	10958.8	67.4	0	0	0	6	0	6	13	7	0	0	0	0
13090.9	3	7.11	375.49	1	0	0	107	30	21.3136	0	801.818	935.455	5	0	0	5601.23	36.5077	1	0	76	5.69049	0.00142201	8.4678	14.659	8.09808	2	5282	0	0
14400	5	19.03	373.79	0	1	0	230	2	15.3273	0	685	742.083	14	0	0	6179.38	45.3462	0	0	0	4	0	3	20	7	2	6011	1803.3	0
36363.6	3	9.229	1260.67	0	2	4	49	12	20.09	0	585	731.25	18	0	0	144945	46.2462	0	0	4	9	0	1	26	12	3	1697	169.7	0
30681.8	3	10.49	1218.67	2	1	4	38	21	28.3182	1	740	801.667	26	0	0	18178.5	12.4923	0	0	4	12	0	7	47	23	3	7458	2237.4	1
11818.2	3	18.997	357.88	0	1	0	469	27	13.8927	0	548.182	685.227	7	1	1	6670.46	59.6	1	0	0	2	0	12	5	3	3	4769	953.8	0
13090.9	5	15.389	279.16	1	1	0	143	8	23.9727	1	540	585	12	0	0	12122.3	53.4154	1	0	0	9	0	4	19	12	3	3459	0	0
27700	3	12.529	911.99	0	2	0	608	0	23.3264	2	650	758.333	11	0	0	16912	37.0462	0	0	0	4	0	8	15	13	3	4222	0	0
18600	3	17.091	681.71	1	1	0	112	23	28.4645	0	700	758.333	9	0	0	17039.1	72.8	0	0	0	4	0	17	12	8	3	2709	0	0
9818.18	3	9.891	392.81	2	1	0	557	7	2.91818	0	736.364	859.091	4	1	0	3312.62	22.3	0	0	0	3	0	1	11	6	2	5573	1114.6	0
25600	5	25.014	717.86	0	2	2	64	14	15.36	2	685	856.25	13	0	0	14115.2	35.7692	0	0	5	7	0	13	10	5	3	1961	588.3	0
12000	3	12.584	395.37	2	0	2	61	31	9.29455	0	736.364	797.727	11	0	0	1855.38	15.1154	0	0	5	4	0	6	13	7	3	195	39	0
3927.27	3	18.45	130.97	0	1	5	845	16	22.3036	0	736.364	797.727	6	0	0	7029	98.8846	0	0	6	5	0	4	7	4	3	1269	126.9	0
[truncated: 8,001 more rows]
